# Supplementary material for: Crown ether-like discrete clusters for sodium binding and gas adsorption
Source: Royal Society of Chemistry journal article supplement (doi:10.1039/d3dt00341h), 2023-01-01
Supplement: d3dt00341h1.pdf [file d3dt00341h1.pdf]

## Supporting materials

# Crown ethers-like discrete clusters for sodium binding and gas adsorptions

Lan Deng,<sup>a</sup> Deng-Hui Ma,<sup>a,b</sup> Zhen-Lang Xie,<sup>a</sup> Rong-Yan Lin,<sup>a</sup> Zhao-Hui Zhou<sup>\*,a</sup>

<sup>a</sup>State Key Laboratory of Physical Chemistry of Solid Surfaces and Department of Chemistry, College of Chemistry and Chemical Engineering, Xiamen University, Xiamen, 361005, China, Tel: + 86-592-2184531; Fax: + 86-592-2183047  
zhzhou@xmu.edu.cn

<sup>b</sup>Fujian Provincial Key Laboratory of Theoretical and Computational Chemistry, Xiamen University

### Figure and Table Options

- Figure S1.** (a) Perspective view of  $[\text{Mo}_6\text{O}_6(\mu_2\text{-O})_9(\text{Htrz})_6] \cdot 15\text{H}_2\text{O}$  (**1**); 2D layered diagrams of  $[\text{Mo}_6\text{O}_6(\mu_2\text{-O})_9(\text{Htrz})_6] \cdot 15\text{H}_2\text{O}$  (**1**) in *a* (b) and *b* (c) axes respectively. Violet polyhedra represent Mo–O/N centers.
- Figure S2.** (a) The smallest asymmetric unit of the molecule in  $\text{Na}[\text{Mo}_6\text{O}_6(\mu_2\text{-O})_9(\text{Htrz})_5(\text{trz})] \cdot 12\text{H}_2\text{O}$  (**2**); (b) Perspective view of  $\text{Na}[\text{Mo}_6\text{O}_6(\mu_2\text{-O})_9(\text{Htrz})_5(\text{trz})] \cdot 12\text{H}_2\text{O}$  (**2**), free and disordered water molecules were omitted for clarity. 2D packing diagrams of  $\text{Na}[\text{Mo}_6\text{O}_6(\mu_2\text{-O})_9(\text{Htrz})_5(\text{trz})] \cdot 12\text{H}_2\text{O}$  (**2**) in *b* (c) and *c* (d) axes respectively.
- Figure S3.** (a) The smallest asymmetric unit of the molecule in  $\text{Na}_2[\text{Mo}_6\text{O}_6(\mu_2\text{-O})_9(\text{Htrz})_4(\text{trz})_2] \cdot 10\text{H}_2\text{O}$  (**3**); (b) Perspective view of  $\text{Na}_2[\text{Mo}_6\text{O}_6(\mu_2\text{-O})_9(\text{Htrz})_4(\text{trz})_2] \cdot 10\text{H}_2\text{O}$  (**3**), free and disordered water molecules were omitted for clarity. 2D packing diagrams of  $\text{Na}_2[\text{Mo}_6\text{O}_6(\mu_2\text{-O})_9(\text{Htrz})_4(\text{trz})_2] \cdot 10\text{H}_2\text{O}$  (**3**) in *a* (c) and *b* (d) axes respectively.
- Figure S4.** (a) Perspective view of  $\text{Na}_2[\text{Mo}_6\text{O}_6(\mu_2\text{-O})_9(\text{Htrz})_4(\text{trz})_2] \cdot 49\text{H}_2\text{O}$  (**4**), free and disordered water molecules were omitted for clarity. Packing diagrams of  $\text{Na}_2[\text{Mo}_6\text{O}_6(\mu_2\text{-O})_9(\text{Htrz})_4(\text{trz})_2] \cdot 49\text{H}_2\text{O}$  (**4**) in *b* (b) and *c* (c) axes respectively.

- Figure S5.** MOF-like simplified topological nets in **1** ~ **4** in the *c*- (a ~ c) and *a*- (d) directions respectively. All spheres represent an integral Mo<sub>6</sub> unit.
- Figure S6.** Gases adsorption isotherms of Na[Mo<sub>6</sub>O<sub>6</sub>(μ<sub>2</sub>-O)<sub>9</sub>(Htrz)<sub>5</sub>(trz)] · 12H<sub>2</sub>O (**2**) at 298 K at different pressures for O<sub>2</sub> (a), CO<sub>2</sub> (b), H<sub>2</sub> (c), CH<sub>4</sub> (d), N<sub>2</sub> (e) respectively.
- Figure S7.** Gases adsorption isotherms of Na<sub>2</sub>[Mo<sub>6</sub>O<sub>6</sub>(μ<sub>2</sub>-O)<sub>9</sub>(Htrz)<sub>4</sub>(trz)<sub>2</sub>] · 10H<sub>2</sub>O (**3**) at 298 K at different pressures for O<sub>2</sub> (a), CO<sub>2</sub> (b), H<sub>2</sub> (c), CH<sub>4</sub> (d), N<sub>2</sub> (e) respectively.
- Figure S8.** Gases adsorption isotherms of Na<sub>2</sub>[Mo<sub>6</sub>O<sub>6</sub>(μ<sub>2</sub>-O)<sub>9</sub>(Htrz)<sub>4</sub>(trz)<sub>2</sub>] · 49H<sub>2</sub>O (**4**) at 298 K at different pressures for O<sub>2</sub> (a), CO<sub>2</sub> (b), H<sub>2</sub> (c), CH<sub>4</sub> (d), N<sub>2</sub> (e) respectively.
- Figure S9.** O<sub>2</sub> and CO<sub>2</sub> adsorption isotherms for **2** ~ **4** (a ~ c) respectively at 298 K and pressures of up to 1 bar.
- Figure S10.** N<sub>2</sub> adsorption-desorption isotherms of **2** ~ **4** at 77 K respectively.
- Figure S11.** Pore distributions for samples **2** ~ **4** using original H-K methods.
- Figure S12.** The SEM images of samples **2** ~ **4** (a ~ c) after gas adsorptions.
- Figure S13.** (a) TGA of Na[Mo<sub>6</sub>O<sub>6</sub>(μ<sub>2</sub>-O)<sub>9</sub>(Htrz)<sub>5</sub>(trz)] · 12H<sub>2</sub>O (**2**); (b) TGA of Na<sub>2</sub>[Mo<sub>6</sub>O<sub>6</sub>(μ<sub>2</sub>-O)<sub>9</sub>(Htrz)<sub>4</sub>(trz)<sub>2</sub>] · 10H<sub>2</sub>O (**3**); (c) TGA of Na<sub>2</sub>[Mo<sub>6</sub>O<sub>6</sub>(μ<sub>2</sub>-O)<sub>9</sub>(Htrz)<sub>4</sub>(trz)<sub>2</sub>] · 49H<sub>2</sub>O (**4**) respectively.
- Figure S14.** Powder XRD curves for Na[Mo<sub>6</sub>O<sub>6</sub>(μ<sub>2</sub>-O)<sub>9</sub>(Htrz)<sub>5</sub>(trz)] · 12H<sub>2</sub>O (**2**, a), Na<sub>2</sub>[Mo<sub>6</sub>O<sub>6</sub>(μ<sub>2</sub>-O)<sub>9</sub>(Htrz)<sub>4</sub>(trz)<sub>2</sub>] · 10H<sub>2</sub>O (**3**, b) and Na<sub>2</sub>[Mo<sub>6</sub>O<sub>6</sub>(μ<sub>2</sub>-O)<sub>9</sub>(Htrz)<sub>4</sub>(trz)<sub>2</sub>] · 49H<sub>2</sub>O (**4**, c) respectively.
- Figure S15.** IR spectra of Na[Mo<sub>6</sub>O<sub>6</sub>(μ<sub>2</sub>-O)<sub>9</sub>(Htrz)<sub>5</sub>(trz)] · 12H<sub>2</sub>O (**2**), Na<sub>2</sub>[Mo<sub>6</sub>O<sub>6</sub>(μ<sub>2</sub>-O)<sub>9</sub>(Htrz)<sub>4</sub>(trz)<sub>2</sub>] · 10H<sub>2</sub>O (**3**) and Na<sub>2</sub>[Mo<sub>6</sub>O<sub>6</sub>(μ<sub>2</sub>-O)<sub>9</sub>(Htrz)<sub>4</sub>(trz)<sub>2</sub>] · 49H<sub>2</sub>O (**4**) respectively.
- Figure S16.** FT-IR spectrum of 1H-1,2,3-triazole [C<sub>2</sub>H<sub>3</sub>N<sub>3</sub>] in KBr plate.
- Figure S17.** Diffused reflectance spectra of solids Na[Mo<sub>6</sub>O<sub>6</sub>(μ<sub>2</sub>-O)<sub>9</sub>(Htrz)<sub>5</sub>(trz)] · 12H<sub>2</sub>O (**2**), Na<sub>2</sub>[Mo<sub>6</sub>O<sub>6</sub>(μ<sub>2</sub>-O)<sub>9</sub>(Htrz)<sub>4</sub>(trz)<sub>2</sub>] · 10H<sub>2</sub>O (**3**) and Na<sub>2</sub>[Mo<sub>6</sub>O<sub>6</sub>(μ<sub>2</sub>-O)<sub>9</sub>(Htrz)<sub>4</sub>(trz)<sub>2</sub>] · 49H<sub>2</sub>O (**4**) respectively.
- Figure S18.** EPR spectra of solids **2** ~ **4** (a ~ c) at 110 K respectively.
- Figure S19.** Solution <sup>13</sup>C NMR spectrum of pure trz.
- Figure S20.** Optimized individual conformers of **1-1** ~ **4-1** (a ~ d) respectively.
- Figure S21.** Local density of state (LDOS) and total density of state (TDOS) plots for compounds **1** ~ **4** (a ~ d), respectively.
- Table S1.** Crystallographic data and structural refinements for complexes [Mo<sub>6</sub>O<sub>6</sub>(μ<sub>2</sub>-O)<sub>9</sub>(Htrz)<sub>6</sub>] · 15H<sub>2</sub>O (**1**), Na[Mo<sub>6</sub>O<sub>6</sub>(μ<sub>2</sub>-O)<sub>9</sub>(Htrz)<sub>5</sub>(trz)] · 12H<sub>2</sub>O (**2**), Na<sub>2</sub>[Mo<sub>6</sub>O<sub>6</sub>(μ<sub>2</sub>-O)<sub>9</sub>(Htrz)<sub>4</sub>(trz)<sub>2</sub>] · 10H<sub>2</sub>O (**3**) and Na<sub>2</sub>[Mo<sub>6</sub>O<sub>6</sub>(μ<sub>2</sub>-O)<sub>9</sub>(Htrz)<sub>4</sub>(trz)<sub>2</sub>] · 49H<sub>2</sub>O (**4**) respectively.
- Table S2.** Selected hydrogen bond distances ( Å ) and angles ( ° ) in [Mo<sub>6</sub>O<sub>6</sub>(μ<sub>2</sub>-O)<sub>9</sub>(Htrz)<sub>6</sub>] · 15H<sub>2</sub>O (**1**).
- Table S3.** Selected hydrogen bond distances ( Å ) and angles ( ° ) in Na[Mo<sub>6</sub>O<sub>6</sub>(μ<sub>2</sub>-O)<sub>9</sub>(Htrz)<sub>5</sub>(trz)] · 12H<sub>2</sub>O (**2**).
- Table S4.** Comparisons of Na–O distances in **2** ~ **4** and some classical crown ethers.

**Table S5.** Selected bond distances (Å) and angles (°) in  $[\text{Mo}_6\text{O}_6(\mu_2\text{-O})_9(\text{Htrz})_6] \cdot 15\text{H}_2\text{O}$  (**1**).

**Table S6.** Selected bond distances (Å) and angles (°) in  $\text{Na}[\text{Mo}_6\text{O}_6(\mu_2\text{-O})_9(\text{Htrz})_5(\text{trz})] \cdot 12\text{H}_2\text{O}$  (**2**).

**Table S7.** Selected bond distances (Å) and angles (°) in  $\text{Na}_2[\text{Mo}_6\text{O}_6(\mu_2\text{-O})_9(\text{Htrz})_4(\text{trz})_2] \cdot 10\text{H}_2\text{O}$  (**3**).

**Table S8.** Selected bond distances (Å) and angles (°) in  $\text{Na}_2[\text{Mo}_6\text{O}_6(\mu_2\text{-O})_9(\text{Htrz})_4(\text{trz})_2] \cdot 49\text{H}_2\text{O}$  (**4**).

**Table S9.** Comparisons of selected bond distances (Å) for  $[\text{Mo}_6\text{O}_6(\mu_2\text{-O})_9(\text{Htrz})_6] \cdot 15\text{H}_2\text{O}$  (**1**),  $\text{Na}[\text{Mo}_6\text{O}_6(\mu_2\text{-O})_9(\text{Htrz})_5(\text{trz})] \cdot 12\text{H}_2\text{O}$  (**2**),  $\text{Na}_2[\text{Mo}_6\text{O}_6(\mu_2\text{-O})_9(\text{Htrz})_4(\text{trz})_2] \cdot 10\text{H}_2\text{O}$  (**3**),  $\text{Na}_2[\text{Mo}_6\text{O}_6(\mu_2\text{-O})_9(\text{Htrz})_4(\text{trz})_2] \cdot 49\text{H}_2\text{O}$  (**4**),  $\text{Na}_3[\text{Mo}_6\text{O}_6(\mu_2\text{-O})_9(\text{Htrz})_3(\text{trz})_3] \cdot 7.5\text{H}_2\text{O}$  (**5**),<sup>1</sup>  $[\text{Mo}_8\text{O}_8(\mu_2\text{-O})_{12}(\text{Htrz})_8] \cdot 30\text{H}_2\text{O}$  (**6**),<sup>1</sup>  $[\text{Mo}_8\text{O}_8(\mu_2\text{-O})_{12}(\text{Htrz})_8] \cdot 62\text{H}_2\text{O}$  (**7**),<sup>2</sup>  $[\text{MoO}_3(1,2,3\text{-Htrz})_{0.5}]$  (**8**),<sup>3</sup>  $[\text{Cu}_3(\text{Htrz})_2\text{Mo}_4\text{O}_{13}(\text{OH})] \cdot 6\text{H}_2\text{O}$  (**9**),<sup>3</sup>  $\text{H}_2[\text{Cu}_4(\text{trz})_5(\text{H}_2\text{O})_2][\text{Mo}_4\text{Cu}_4\text{O}_{26}]_{0.5} \cdot 3\text{H}_2\text{O}$  (**10**),<sup>4</sup>  $[\text{Cu}_{24}(\text{trz})_{16}(\text{H}_2\text{O})\text{Cl}_4(\text{HPMo}_{12}\text{O}_{40})]$  (**11**),<sup>5</sup>  $\text{Cu}(\text{trz})$  (**12**),<sup>3</sup>  $[\text{Cu}_6(\text{trz})_3\text{I}_3]_n$  (**13**),<sup>6</sup>  $(\text{Cu}_5\text{I}_5)[\text{Cu}(\text{trz})_2]^-$  (**14**),<sup>7</sup>  $[\text{Cu}(\text{trz})_2]$  (**15**),<sup>8</sup>  $[\text{Cu}_3(\text{trz})_2\text{V}_4\text{O}_{12}]$  (**16**),<sup>9</sup>  $[\text{Zn}_{10}(\text{trz})_{12}(\text{TADIPA})_2(\text{DMF})_4] \cdot \text{DMF} \cdot 6\text{H}_2\text{O}$  (**17**),<sup>10</sup>  $[\text{Zn}_{10}(\text{trz})_{12}(\text{TPTA})_2(\text{DMA})_2] \cdot 2\text{DMA} \cdot 4\text{H}_2\text{O}$  (**18**),<sup>10</sup>  $[(\text{Zn}_3\text{OH})_2(\text{trz})_6 \cdot \text{Zn}_6(\text{OHOBDC})_6] \cdot 2\text{NH}_2(\text{CH}_3)_2$  (**19**),<sup>11</sup>  $[(\text{Zn}_3\text{OH})_2(\text{trz})_6 \cdot \text{Zn}_6(\text{OBDC})_6] \cdot 2\text{NH}_2(\text{CH}_3)_2$  (**20**),<sup>11</sup>  $[\text{Zn}_3(\text{tp})_2(\text{trz})_2]_n$  (**21**),<sup>12</sup>  $\text{Zn}_5(\text{trz})_6(\text{NO}_3)_4$  (**22**),<sup>13</sup>  $\text{Zn}_3(\text{trz})_2(\text{bdc})_2 \cdot 2\text{DMAc} \cdot \text{C}_6\text{H}_4(\text{OH})_2$  (**23**),<sup>13</sup>  $[\text{Ag}_{29}(\text{trz})_{18}][\text{SiW}_7\text{W}_5\text{O}_{40}][\text{Ag}_{29}\text{SiW}_{12}]$  (**24**),<sup>14</sup>  $\text{H}[\text{Ag}_{27}(\text{trz})_{16}(\text{H}_2\text{O})_4][(\text{AsW}_{12}\text{O}_{40})_2]$  (**25**),<sup>15</sup>  $[\text{Ag}_{15}(\text{trz})_8][\text{AsW}_{12}\text{O}_{40}]$  (**26**),<sup>15</sup>  $\text{H}_3[\text{Ag}_{27}(\text{trz})_{16}(\text{H}_2\text{O})_6][\text{SiW}_{12}\text{O}_{40}]_2 \cdot 5\text{H}_2\text{O}$  (**27**),<sup>16</sup>  $\text{H}[\text{Ag}_{27}(\text{trz})_{16}(\text{H}_2\text{O})_4][\text{PW}_{12}\text{O}_{40}]_2 \cdot 2\text{H}_2\text{O}$  (**28**),<sup>16</sup>  $[\text{Ag}_{23}(\text{trz})_{14}(\text{H}_2\text{O})_2][\text{HSiW}_{12}\text{O}_{40}]$  (**29**),<sup>16</sup>  $[\text{Ag}_{23}(\text{trz})_{14}(\text{H}_2\text{O})_2][\text{PW}_{12}\text{O}_{40}]$  (**30**),<sup>16</sup>  $[\text{Cd}_3(\text{trz})_3\text{Cl}_3]_n$  (**31**),<sup>6</sup>  $\{[\text{Cd}_3(\text{trz})_6] \cdot 6\text{H}_2\text{O}\}_n$  (**32**),<sup>6</sup>  $\text{Cd}[\text{HB}(\text{trz})_3]_2$  (**33**).<sup>17</sup>

**Table S10.** Detail calibrated adsorption data of  $\text{O}_2$ ,  $\text{N}_2$ ,  $\text{H}_2$ ,  $\text{CO}_2$  and  $\text{CH}_4$  for  $\text{Na}[\text{Mo}_6\text{O}_6(\mu_2\text{-O})_9(\text{Htrz})_5(\text{trz})] \cdot 12\text{H}_2\text{O}$  (**2**) at 298 K.

**Table S11.** Detail calibrated adsorption data of  $\text{O}_2$ ,  $\text{N}_2$ ,  $\text{H}_2$ ,  $\text{CO}_2$  and  $\text{CH}_4$  for  $\text{Na}_2[\text{Mo}_6\text{O}_6(\mu_2\text{-O})_9(\text{Htrz})_4(\text{trz})_2] \cdot 10\text{H}_2\text{O}$  (**3**) at 298 K.

**Table S12.** Detail calibrated adsorption data of  $\text{O}_2$ ,  $\text{N}_2$ ,  $\text{H}_2$ ,  $\text{CO}_2$  and  $\text{CH}_4$  for  $\text{Na}_2[\text{Mo}_6\text{O}_6(\mu_2\text{-O})_9(\text{Htrz})_4(\text{trz})_2] \cdot 49\text{H}_2\text{O}$  (**4**) at 298 K.

**Table S13.** Comparisons of  $\text{O}_2$  and  $\text{CO}_2$  adsorption data for **2** ~ **4** with some other reported porous materials at 1.0 bar under different temperatures.

**Table S14.** Bond valence calculations for complexes  $[\text{Mo}_6\text{O}_6(\mu_2\text{-O})_9(\text{Htrz})_6] \cdot 15\text{H}_2\text{O}$  (**1**),  $\text{Na}[\text{Mo}_6\text{O}_6(\mu_2\text{-O})_9(\text{Htrz})_5(\text{trz})] \cdot 12\text{H}_2\text{O}$  (**2**),  $\text{Na}_2[\text{Mo}_6\text{O}_6(\mu_2\text{-O})_9(\text{Htrz})_4(\text{trz})_2] \cdot 10\text{H}_2\text{O}$  (**3**) and  $\text{Na}_2[\text{Mo}_6\text{O}_6(\mu_2\text{-O})_9(\text{Htrz})_4(\text{trz})_2] \cdot 49\text{H}_2\text{O}$  (**4**) respectively.

**Table S15.** Selected average bond lengths (Å) and NPA charge of different N donor and Mo atoms in the optimized individual conformers of **1-1** ~ **4-1**

complexes calculated at the B3LYP/def2SVP/LANL2DZ level of theory.  
**Table S16.** Geometry optimized coordinates for compounds **1 ~ 4** and **1-1 ~ 4-1**, respectively.

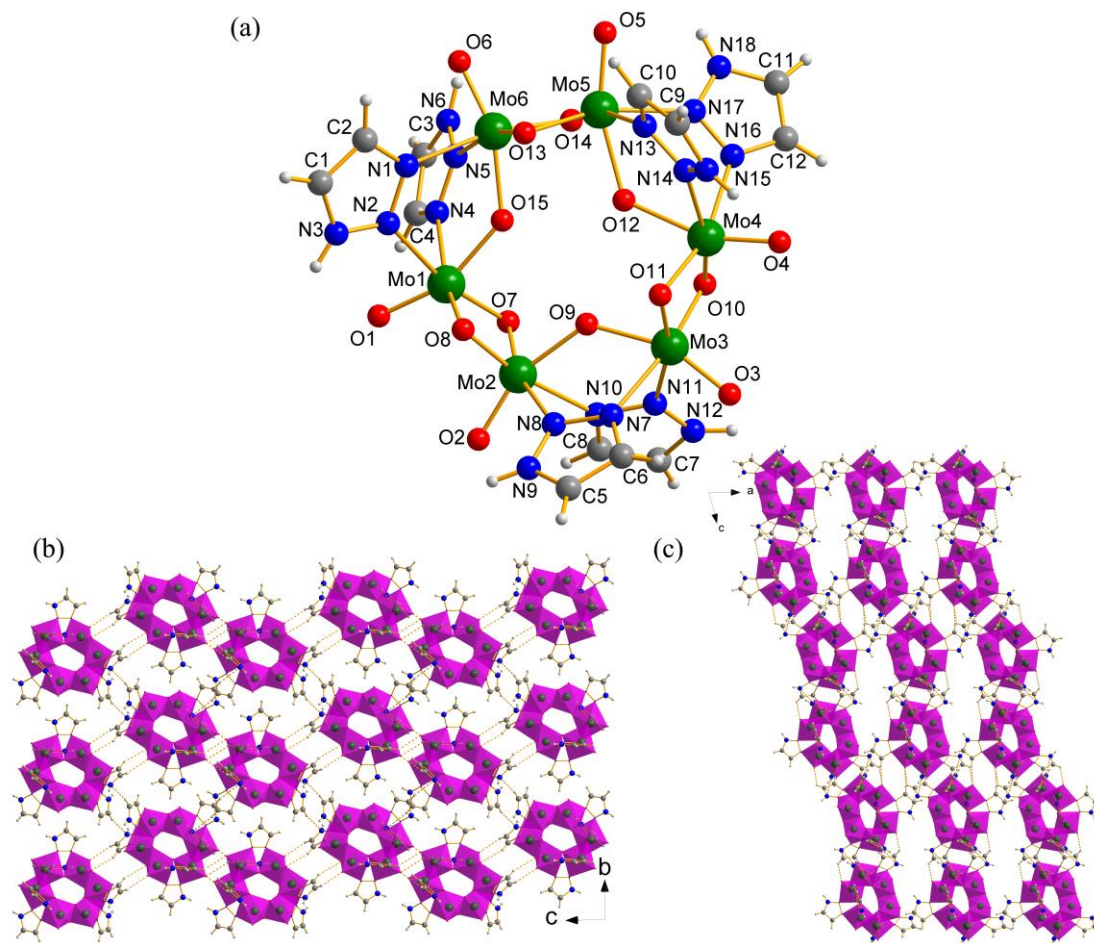

**Figure S1.** (a) Perspective view of  $[\text{Mo}_6\text{O}_6(\mu_2\text{-O})_9(\text{Htrz})_6] \cdot 15\text{H}_2\text{O}$  (**1**); 2D layered diagrams of  $[\text{Mo}_6\text{O}_6(\mu_2\text{-O})_9(\text{Htrz})_6] \cdot 15\text{H}_2\text{O}$  (**1**) in *a* (b) and *b* (c) axes respectively. Violet polyhedra represent Mo–O/N centers.

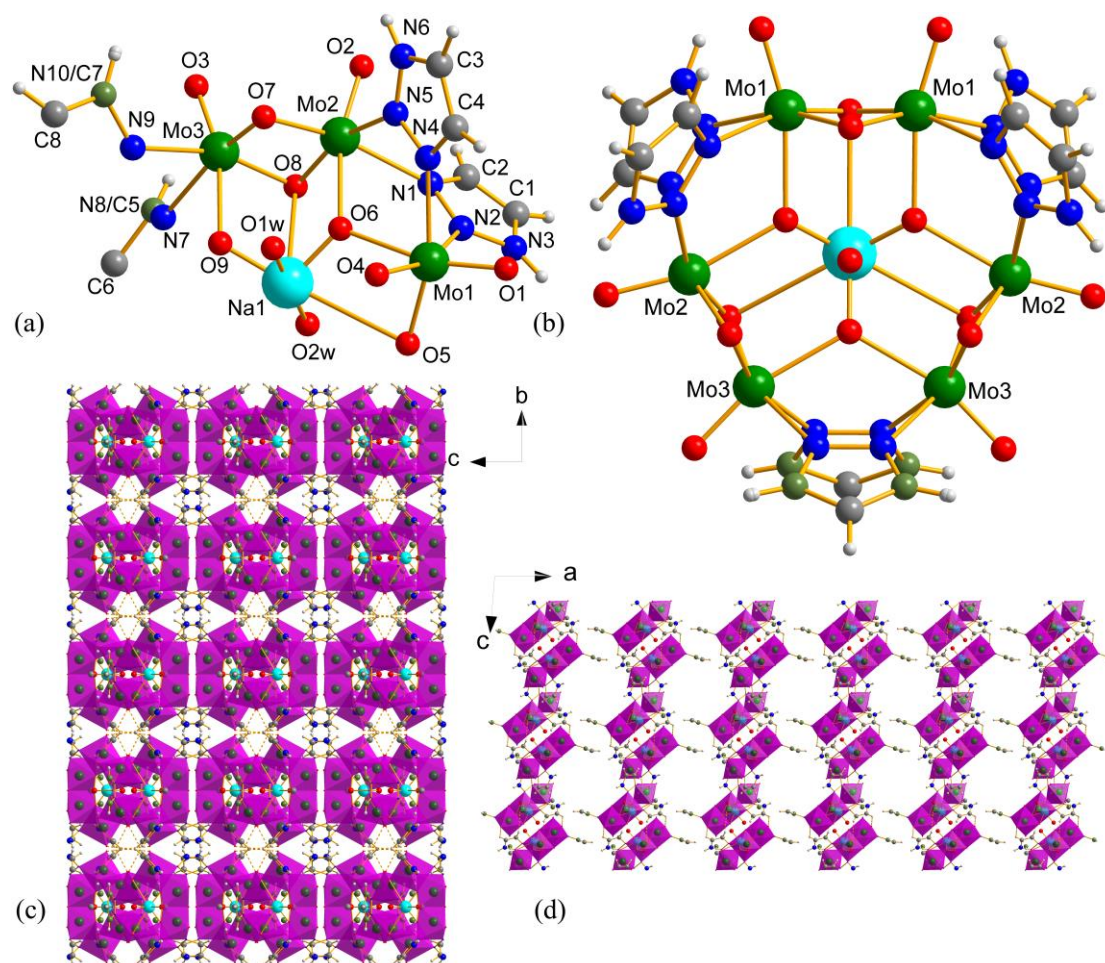

**Figure S2.** (a) The smallest asymmetric unit of the molecule in  $\text{Na}[\text{Mo}_6\text{O}_6(\mu_2\text{-O})_9(\text{Htrz})_5(\text{trz})] \cdot 12\text{H}_2\text{O}$  (**2**); (b) Perspective view of  $\text{Na}[\text{Mo}_6\text{O}_6(\mu_2\text{-O})_9(\text{Htrz})_5(\text{trz})] \cdot 12\text{H}_2\text{O}$  (**2**), free and disordered water molecules were omitted for clarity. 2D packing diagrams of  $\text{Na}[\text{Mo}_6\text{O}_6(\mu_2\text{-O})_9(\text{Htrz})_5(\text{trz})] \cdot 12\text{H}_2\text{O}$  (**2**) in *b* (c) and *c* (d) axes respectively.

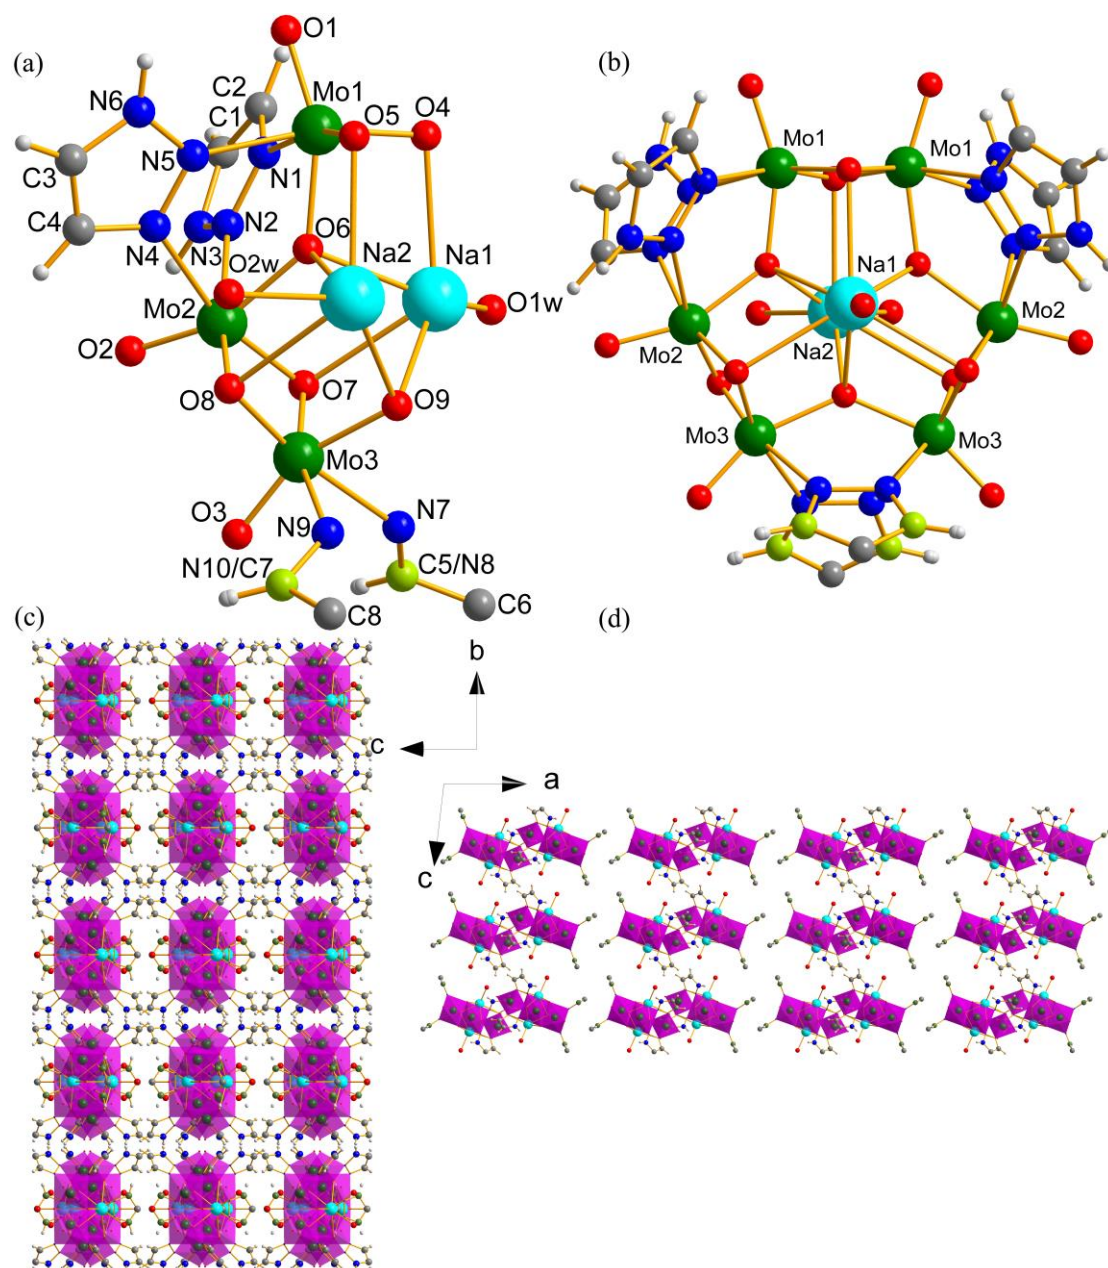

**Figure S3.** (a) The smallest asymmetric unit of the molecule in  $\text{Na}_2[\text{Mo}_6\text{O}_6(\mu_2\text{-O})_9(\text{Htrz})_4(\text{trz})_2] \cdot 10\text{H}_2\text{O}$  (**3**); (b) Perspective view of  $\text{Na}_2[\text{Mo}_6\text{O}_6(\mu_2\text{-O})_9(\text{Htrz})_4(\text{trz})_2] \cdot 10\text{H}_2\text{O}$  (**3**), free and disordered water molecules were omitted for clarity. 2D packing diagrams of  $\text{Na}_2[\text{Mo}_6\text{O}_6(\mu_2\text{-O})_9(\text{Htrz})_4(\text{trz})_2] \cdot 10\text{H}_2\text{O}$  (**3**) in *a* (c) and *b* (d) axes respectively.

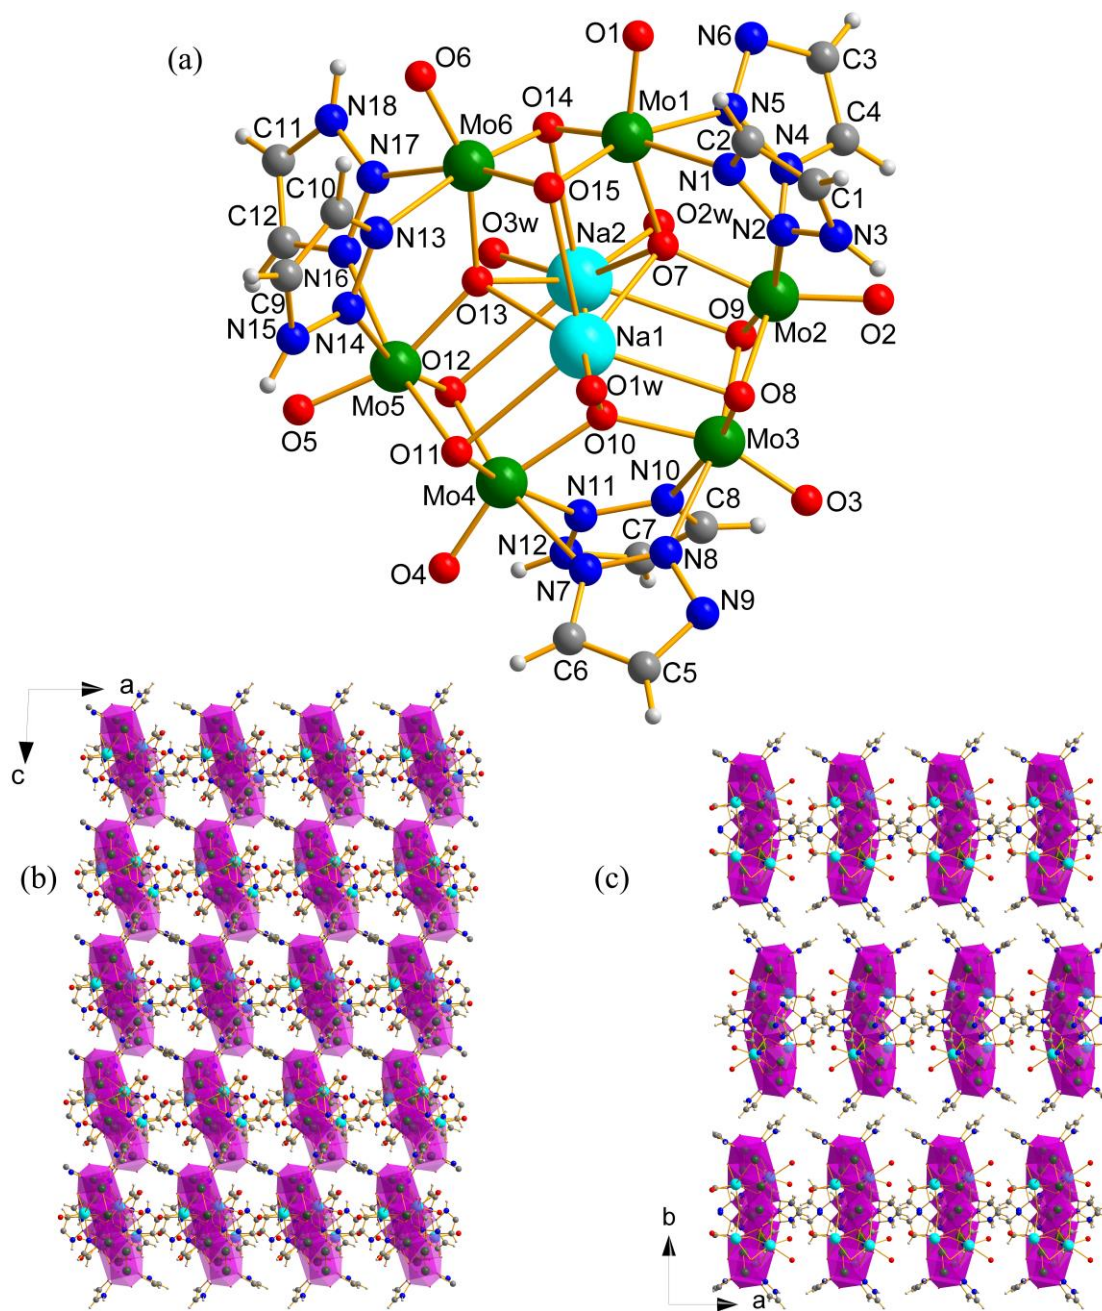



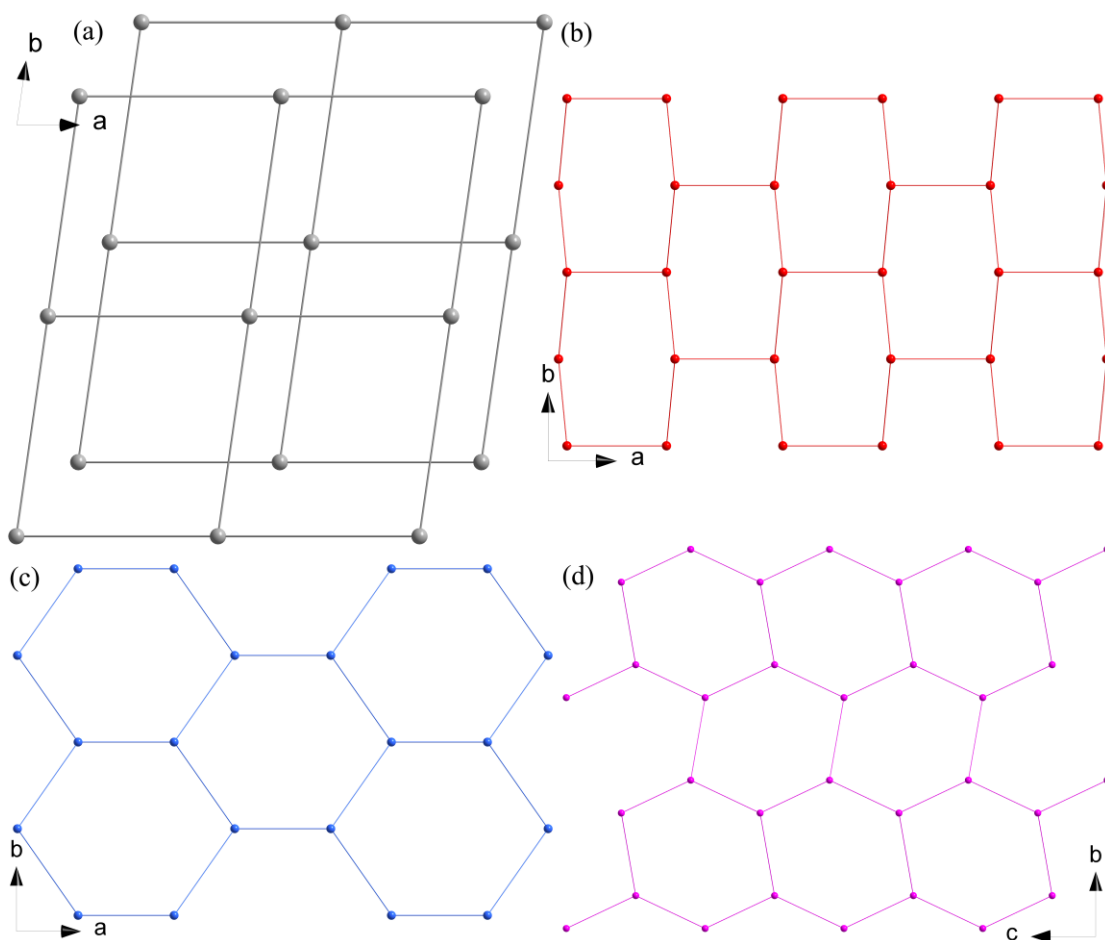

**Figure S5.** MOF-like simplified topological nets in **1** ~ **4** in the *c*- (*a* ~ *c*) and *a*- (*d*) directions respectively. All spheres represent an integral Mo<sub>6</sub> unit.

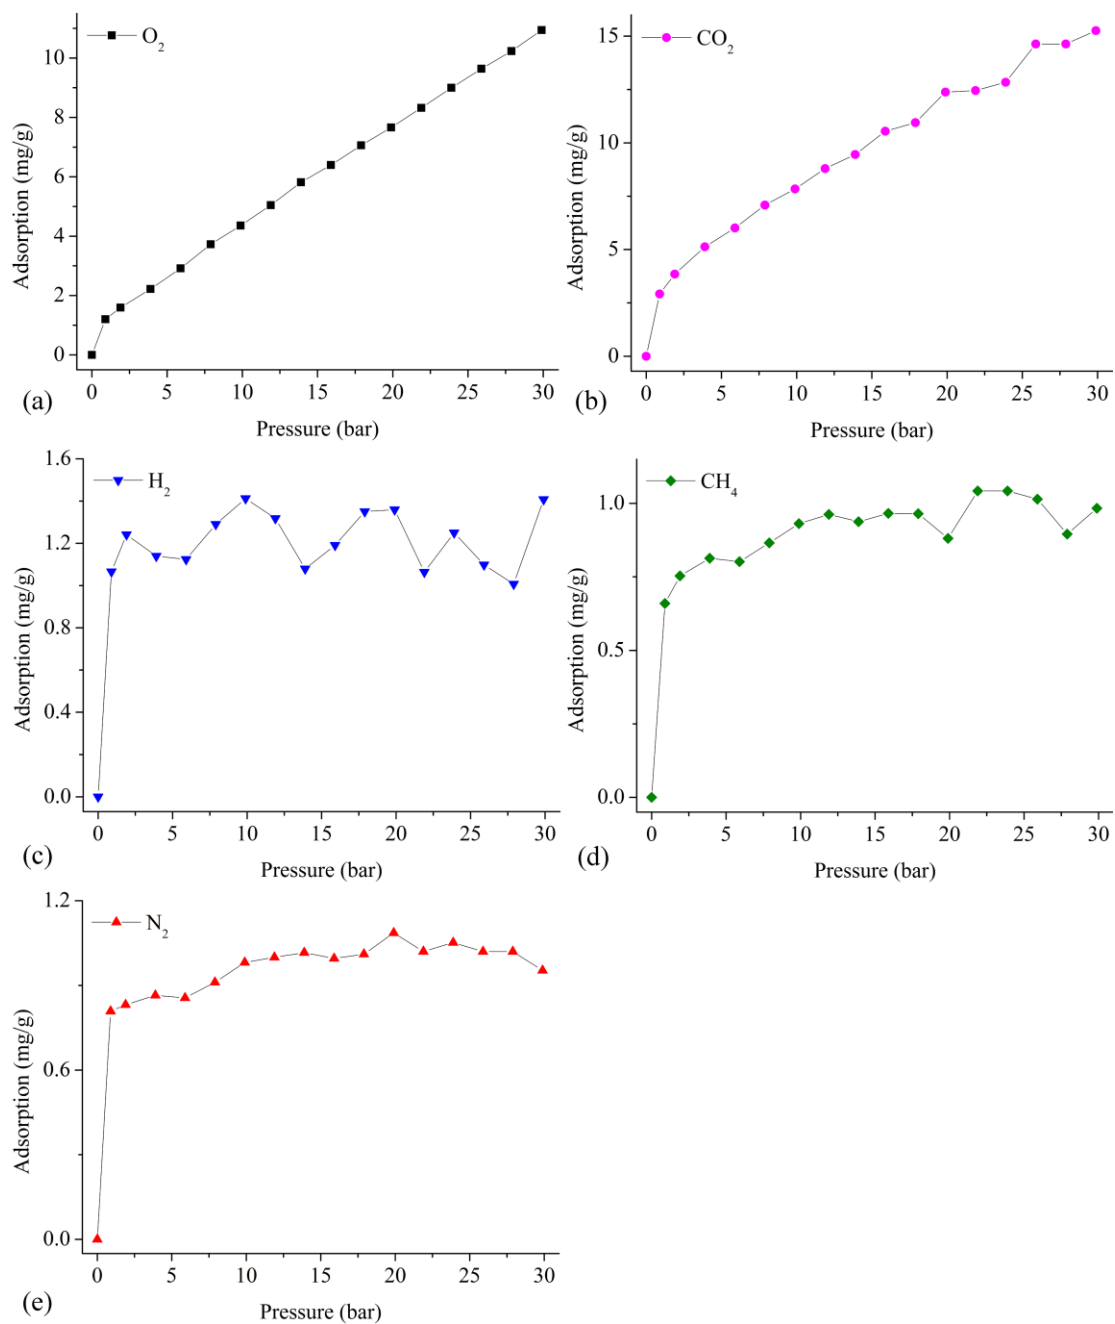

**Figure S6.** Gases adsorption isotherms of Na[Mo<sub>6</sub>O<sub>6</sub>(μ<sub>2</sub>-O)<sub>9</sub>(Htrz)<sub>5</sub>(trz)] · 12H<sub>2</sub>O (2) at 298 K at different pressures for O<sub>2</sub> (a), CO<sub>2</sub> (b), H<sub>2</sub> (c), CH<sub>4</sub> (d), N<sub>2</sub> (e) respectively.

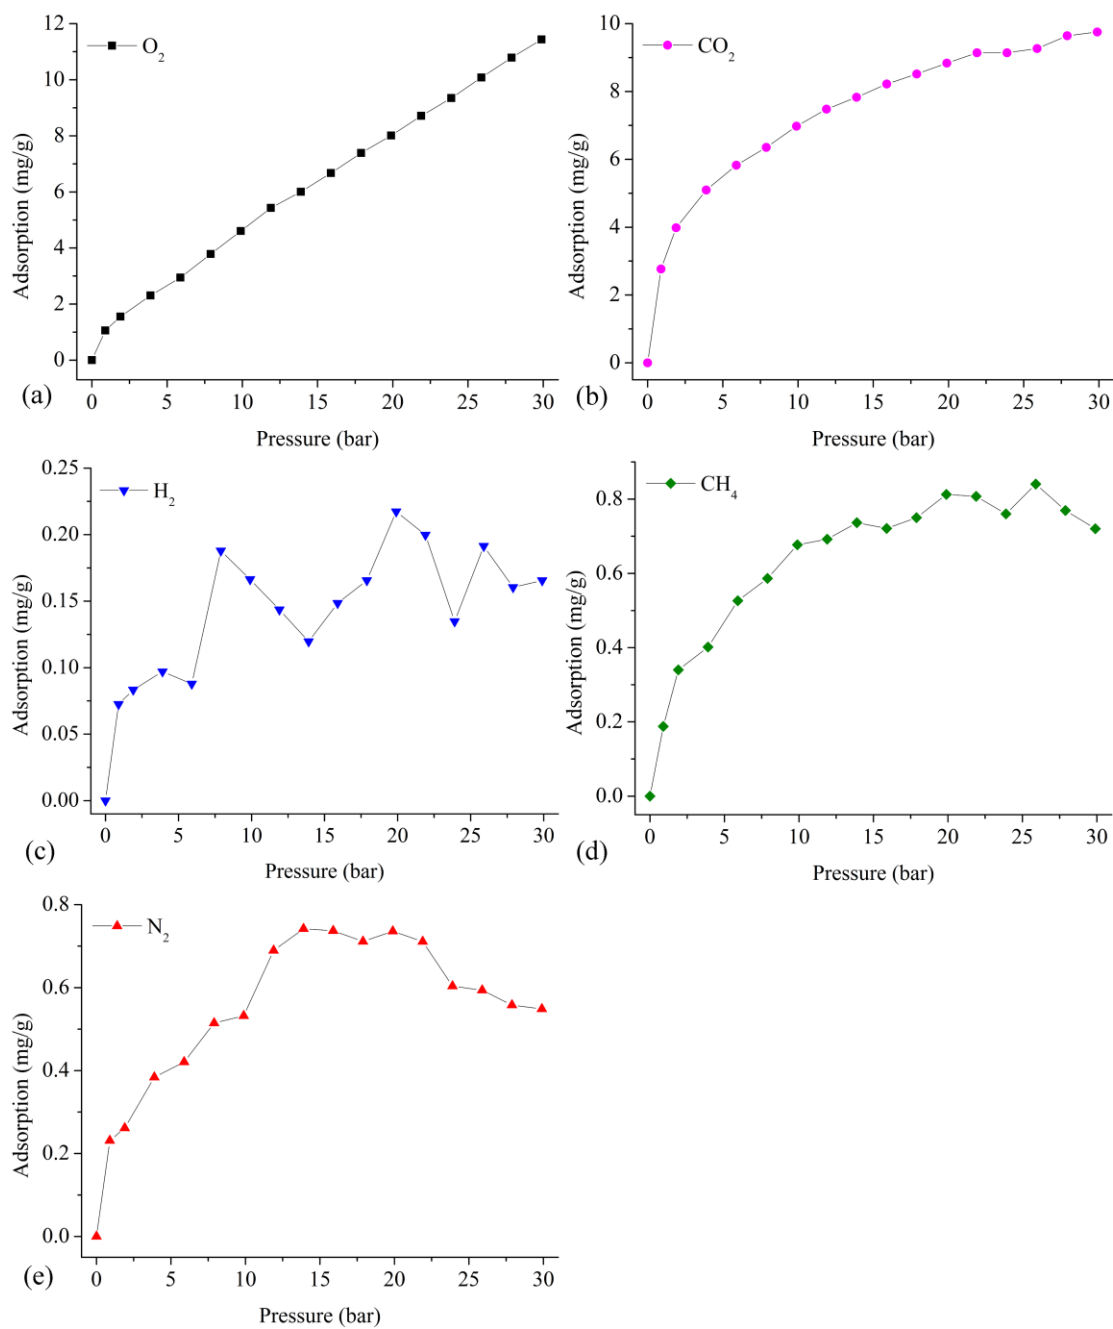

**Figure S7.** Gases adsorption isotherms of  $\text{Na}_2[\text{Mo}_6\text{O}_6(\mu_2\text{-O})_9(\text{Htrz})_4(\text{trz})_2] \cdot 10\text{H}_2\text{O}$  (3) at 298 K at different pressures for  $\text{O}_2$  (a),  $\text{CO}_2$  (b),  $\text{H}_2$  (c),  $\text{CH}_4$  (d),  $\text{N}_2$  (e) respectively.

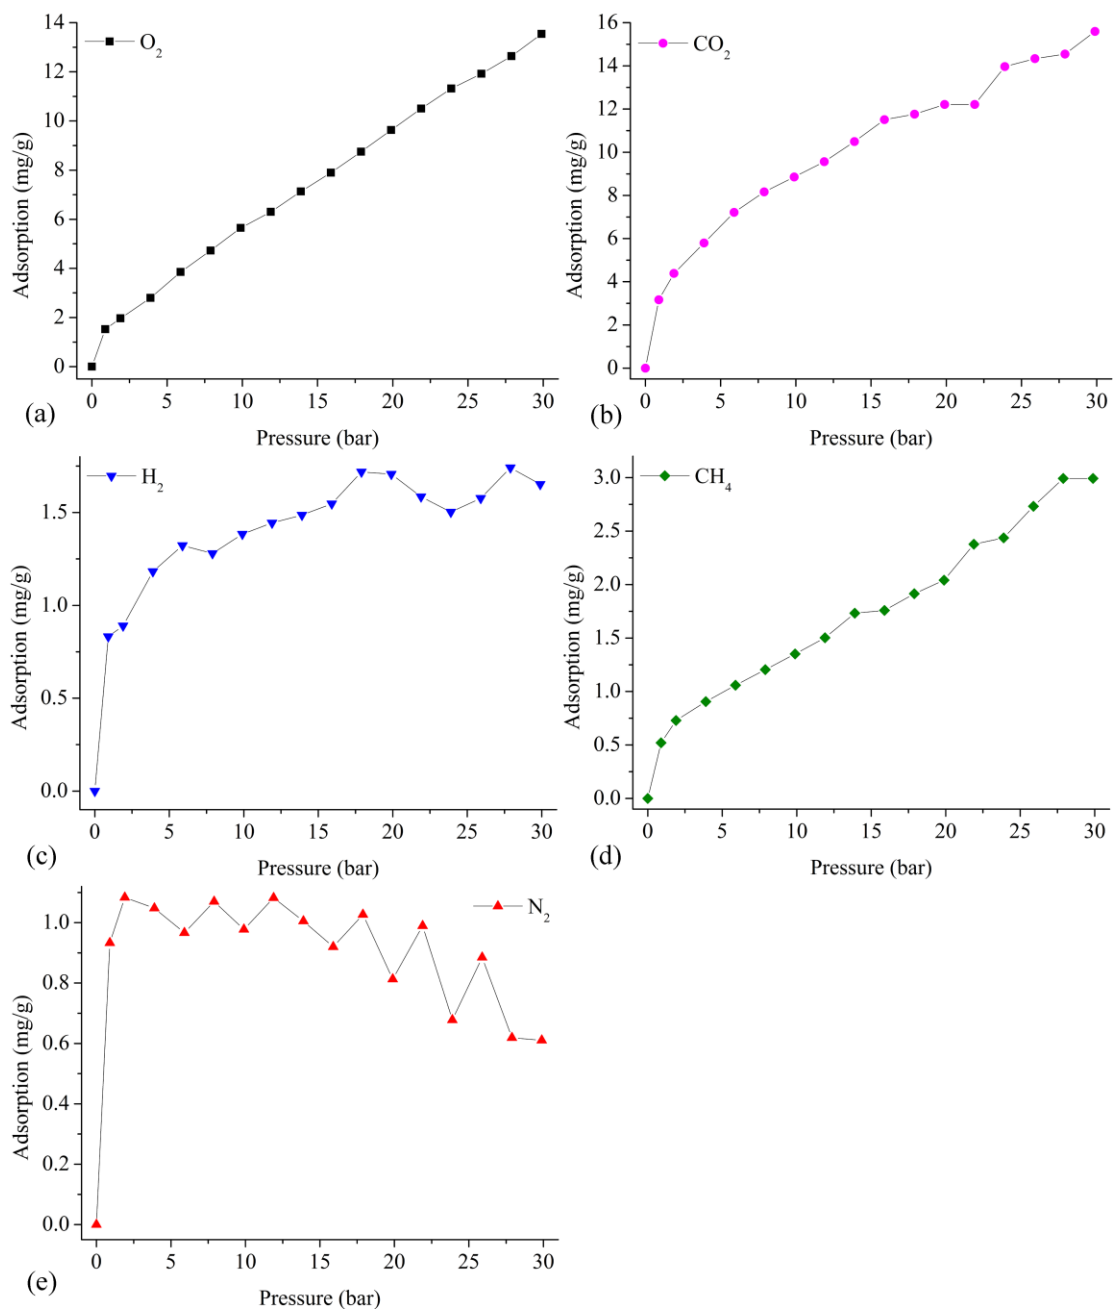

**Figure S8.** Gases adsorption isotherms of  $Na_2[Mo_6O_6(\mu_2-O)_9(Htrz)_4(trz)_2] \cdot 49H_2O$  (**4**) at 298 K at different pressures for  $O_2$  (a),  $CO_2$  (b),  $H_2$  (c),  $CH_4$  (d),  $N_2$  (e) respectively.

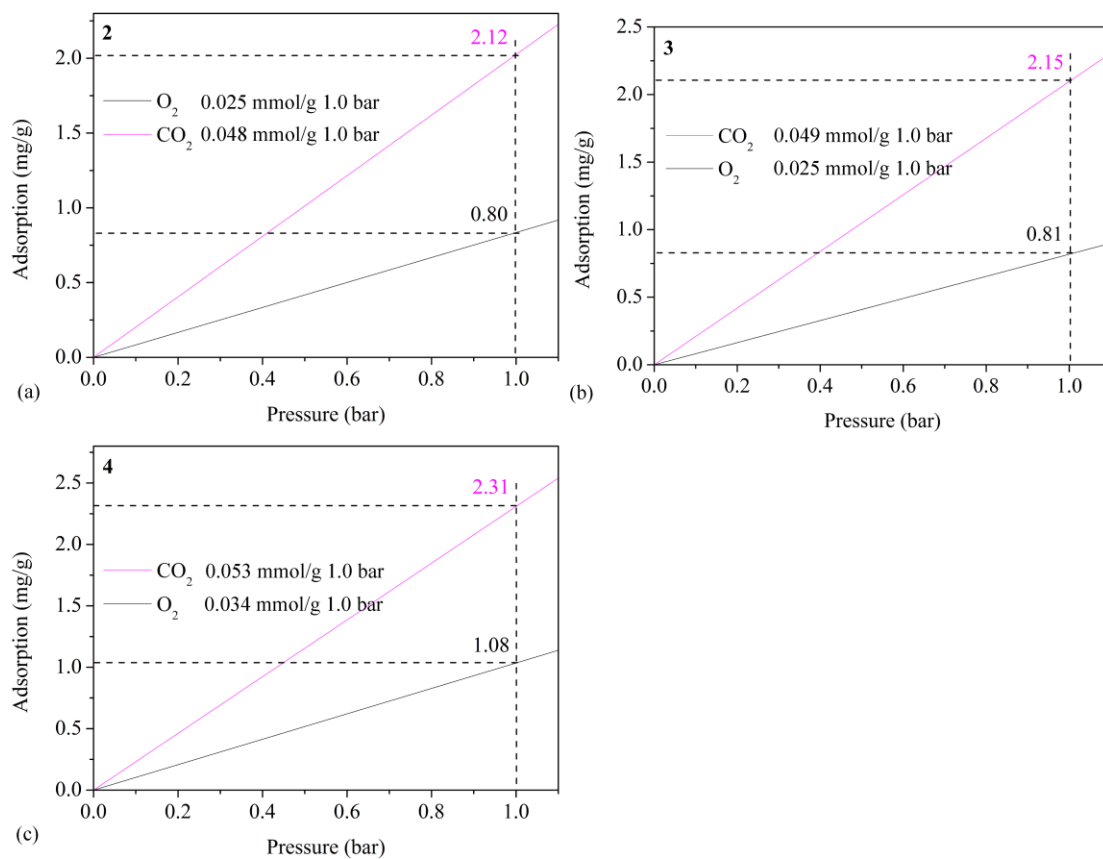

**Figure S9.**  $O_2$  and  $CO_2$  adsorption isotherms for **2** ~ **4** (a ~ c) respectively at 298 K and pressures of up to 1 bar.

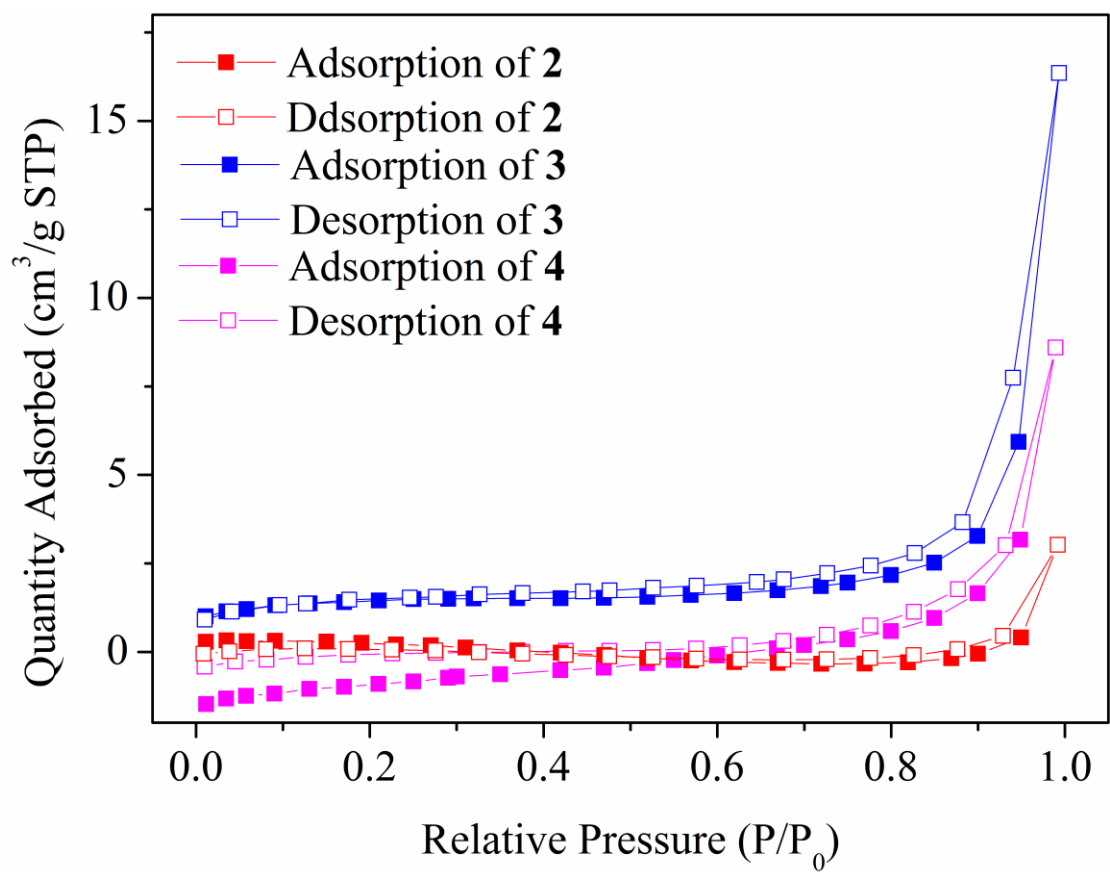

**Figure S10.** N<sub>2</sub> adsorption-desorption isotherms of **2** ~ **4** at 77 K respectively.

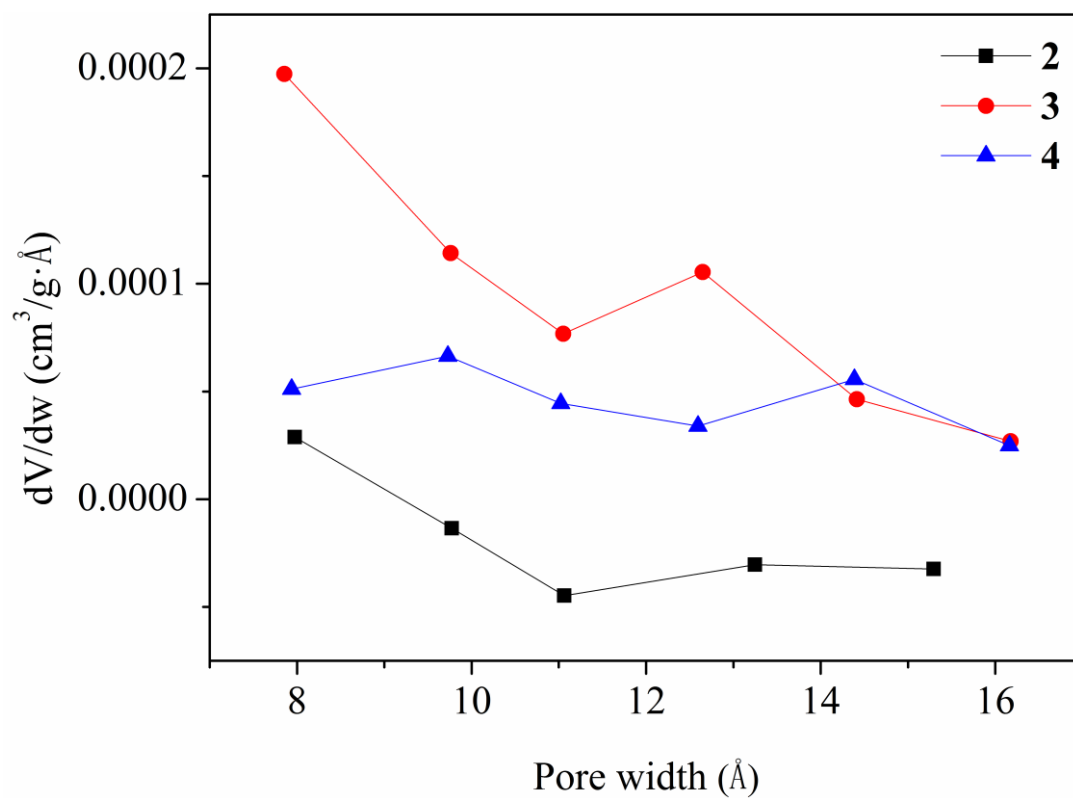

**Figure S11.** Pore distributions for samples 2 ~ 4 using original H-K methods.

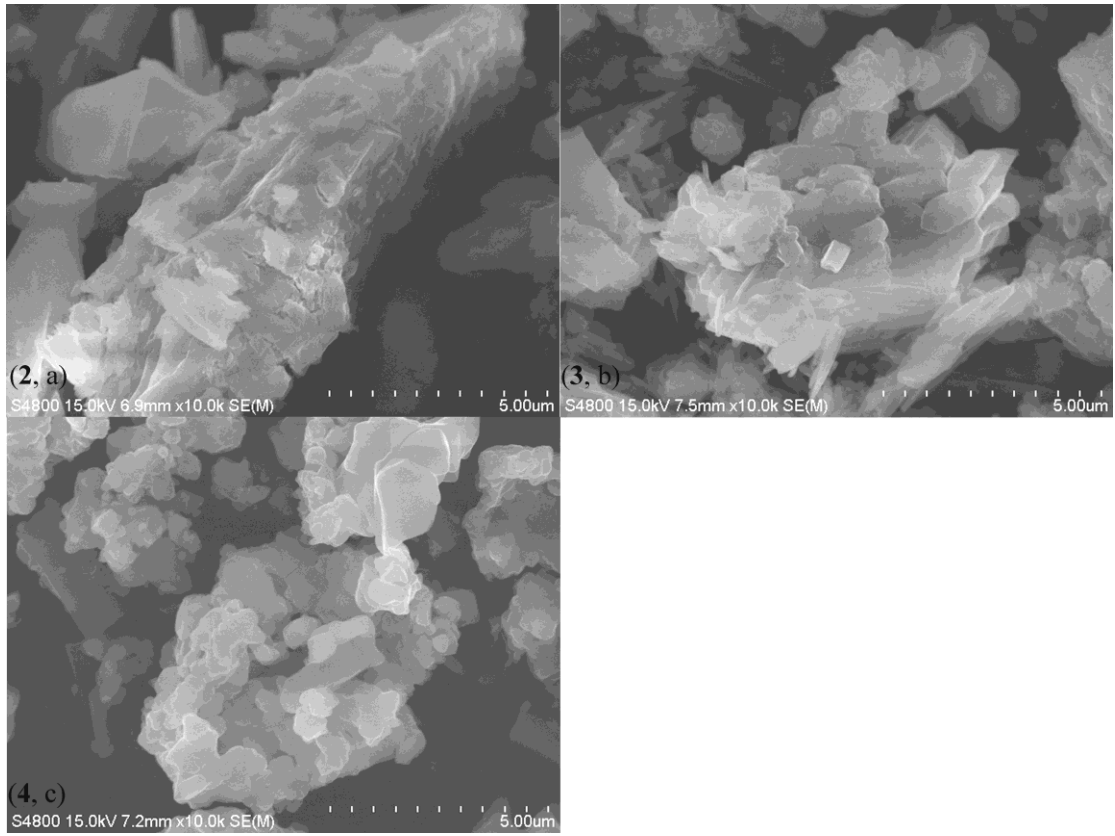

**Figure S12.** The SEM images of samples **2 ~ 4** (a ~ c) after gas adsorptions.



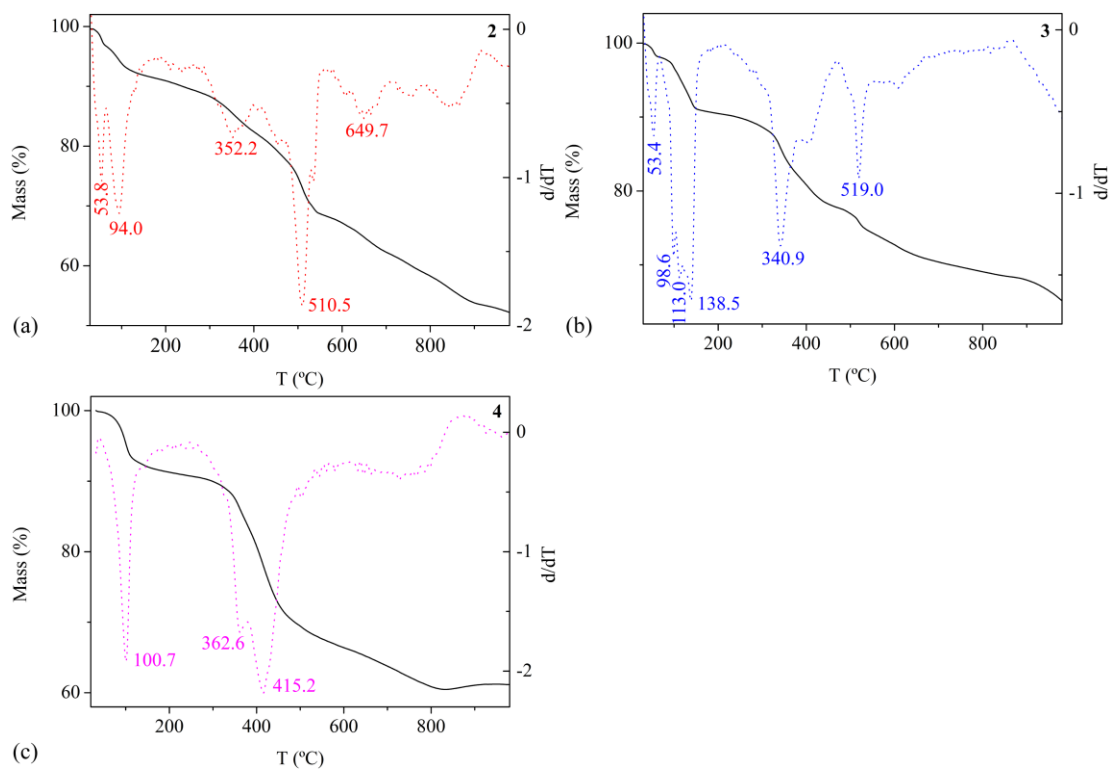

**Figure S13.** (a) TGA of  $\text{Na}[\text{Mo}_6\text{O}_6(\mu_2\text{-O})_9(\text{Htrz})_5(\text{trz})] \cdot 12\text{H}_2\text{O}$  (**2**); (b) TGA of  $\text{Na}_2[\text{Mo}_6\text{O}_6(\mu_2\text{-O})_9(\text{Htrz})_4(\text{trz})_2] \cdot 10\text{H}_2\text{O}$  (**3**); (c) TGA of  $\text{Na}_2[\text{Mo}_6\text{O}_6(\mu_2\text{-O})_9(\text{Htrz})_4(\text{trz})_2] \cdot 49\text{H}_2\text{O}$  (**4**) respectively.

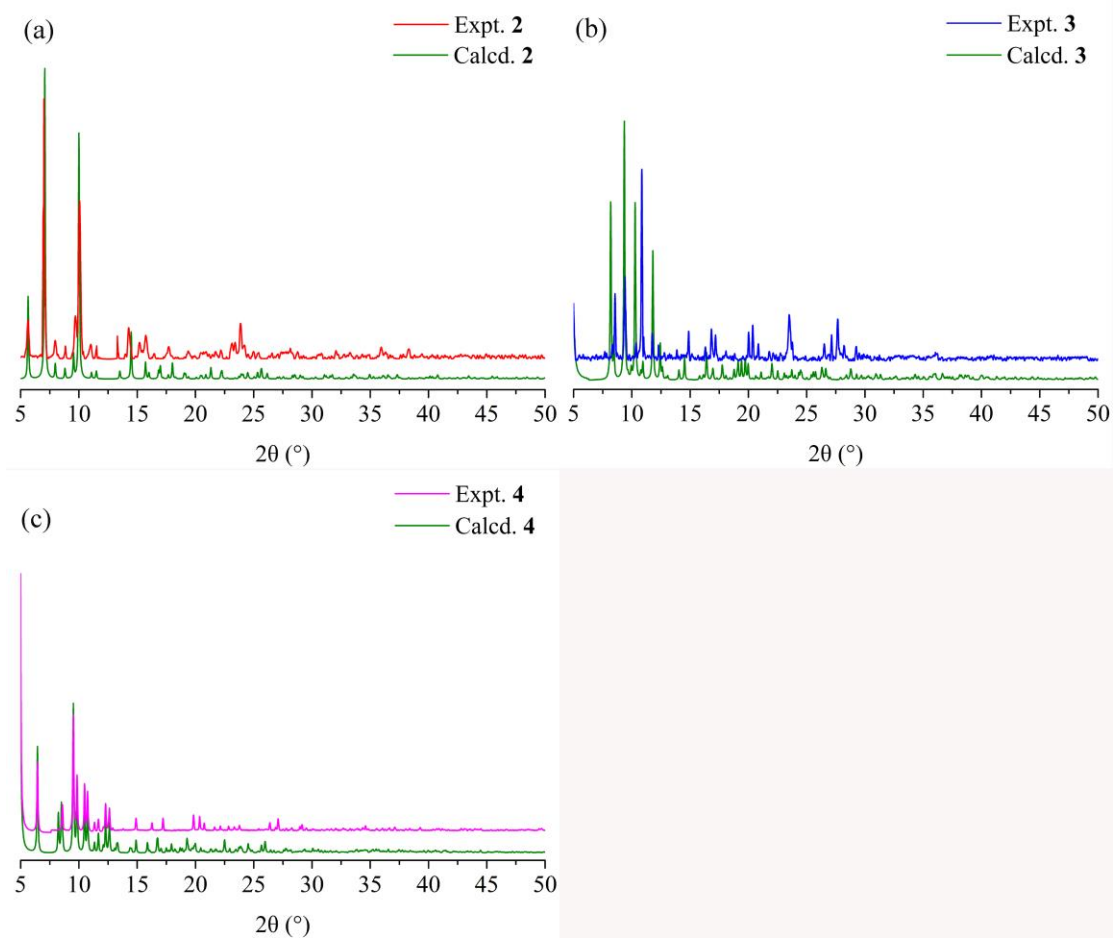

**Figure S14.** Powder XRD curves for  $\text{Na}[\text{Mo}_6\text{O}_6(\mu_2\text{-O})_9(\text{Htrz})_5(\text{trz})] \cdot 12\text{H}_2\text{O}$  (**2**, a),  $\text{Na}_2[\text{Mo}_6\text{O}_6(\mu_2\text{-O})_9(\text{Htrz})_4(\text{trz})_2] \cdot 10\text{H}_2\text{O}$  (**3**, b) and  $\text{Na}_2[\text{Mo}_6\text{O}_6(\mu_2\text{-O})_9(\text{Htrz})_4(\text{trz})_2] \cdot 49\text{H}_2\text{O}$  (**4**, c) respectively.

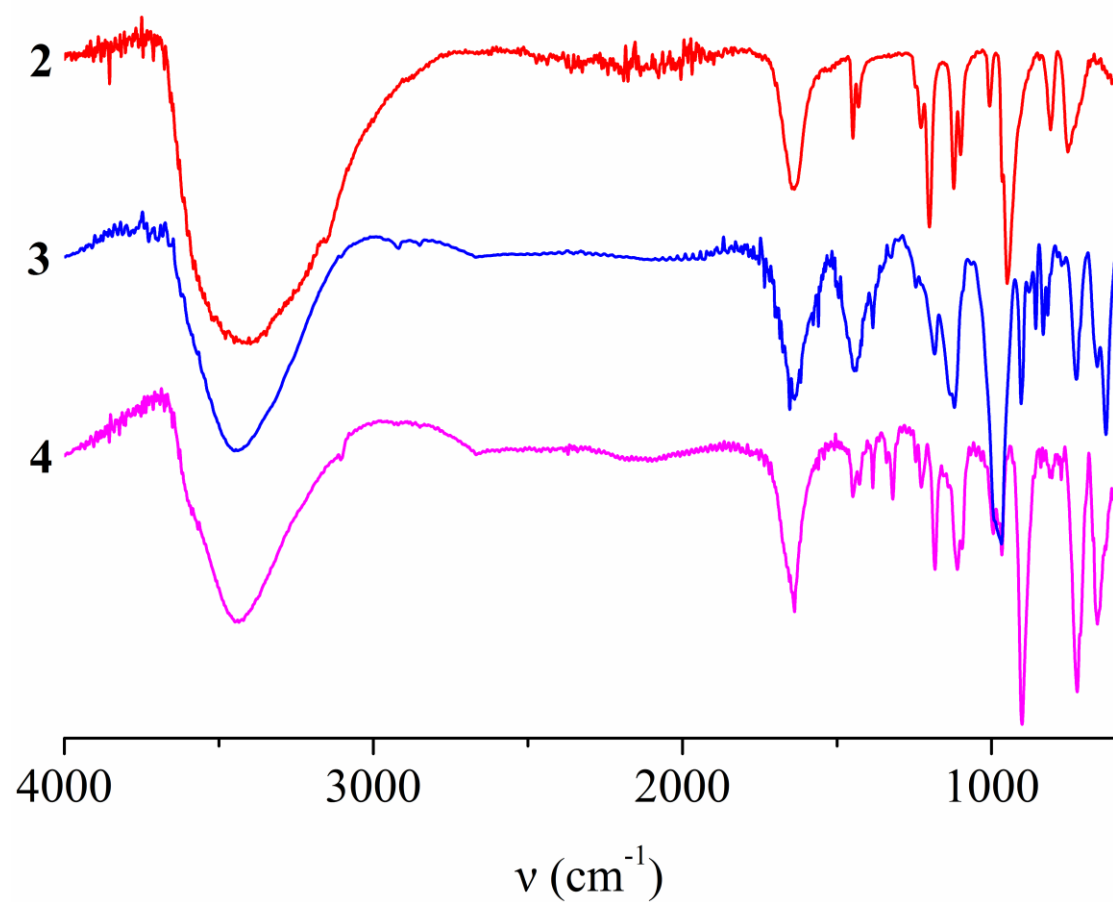

**Figure S15.** IR spectra of  $\text{Na}[\text{Mo}_6\text{O}_6(\mu_2\text{-O})_9(\text{Htrz})_5(\text{trz})] \cdot 12\text{H}_2\text{O}$  (2),  $\text{Na}_2[\text{Mo}_6\text{O}_6(\mu_2\text{-O})_9(\text{Htrz})_4(\text{trz})_2] \cdot 10\text{H}_2\text{O}$  (3) and  $\text{Na}_2[\text{Mo}_6\text{O}_6(\mu_2\text{-O})_9(\text{Htrz})_4(\text{trz})_2] \cdot 49\text{H}_2\text{O}$  (4) respectively.

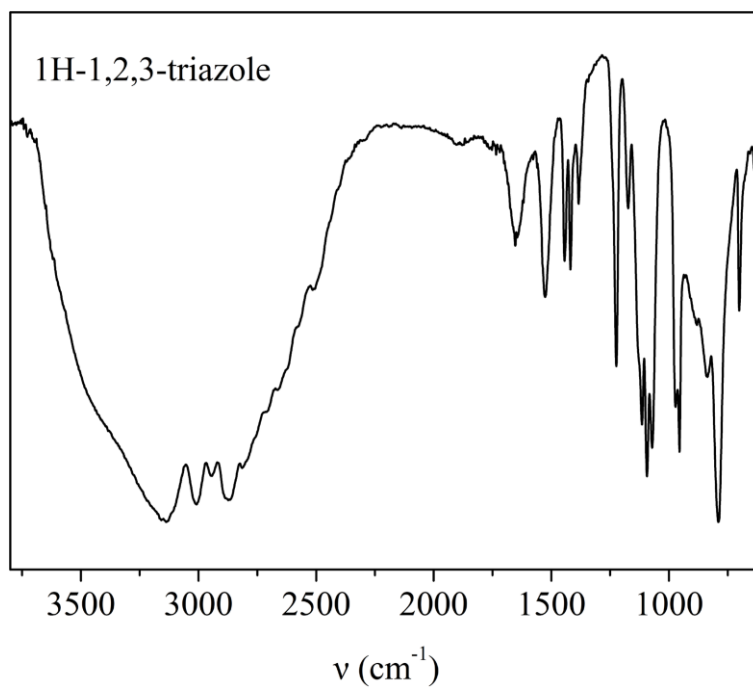

**Figure S16.** FT-IR spectrum of 1H-1,2,3-triazole [ $\text{C}_2\text{H}_3\text{N}_3$ ] in KBr plate.

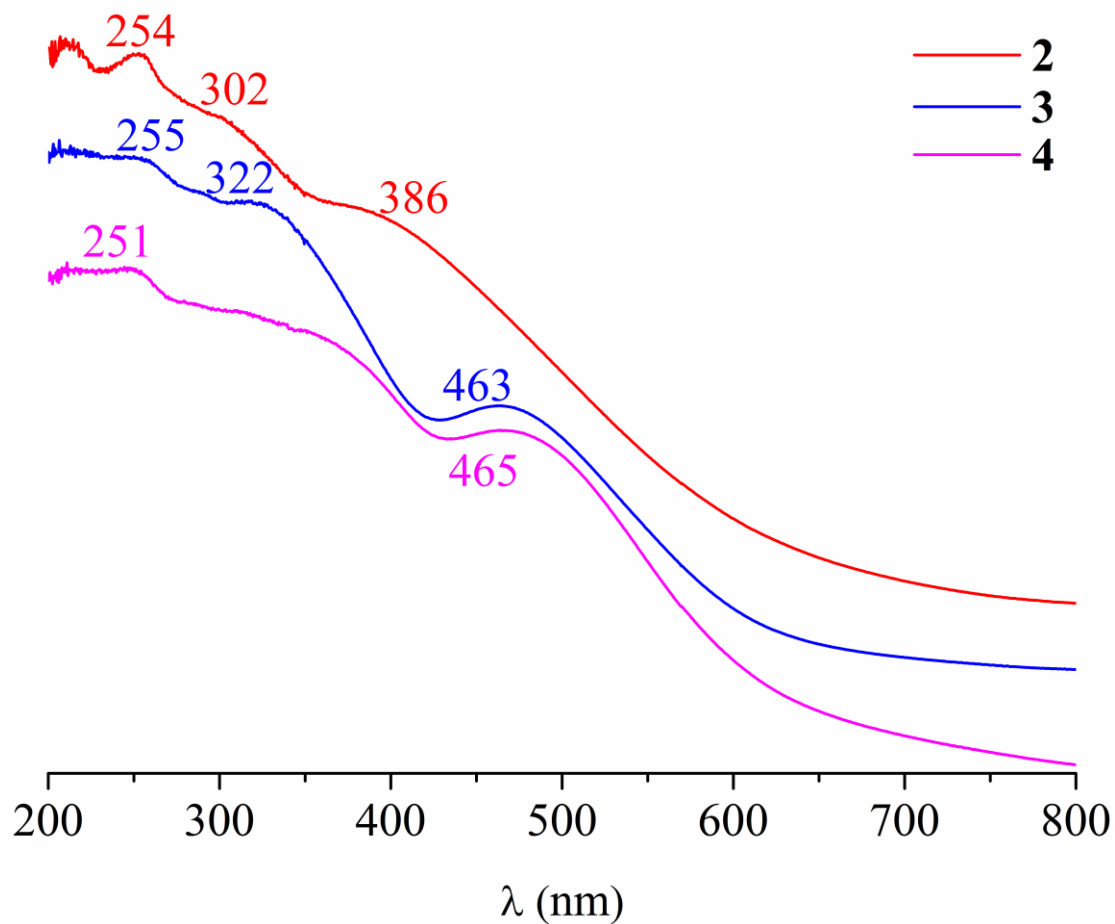

**Figure S17.** Diffused reflectance spectra of solids  $\text{Na}[\text{Mo}_6\text{O}_6(\mu_2\text{-O})_9(\text{Htrz})_5(\text{trz})] \cdot 12\text{H}_2\text{O}$  (2),  $\text{Na}_2[\text{Mo}_6\text{O}_6(\mu_2\text{-O})_9(\text{Htrz})_4(\text{trz})_2] \cdot 10\text{H}_2\text{O}$  (3) and  $\text{Na}_2[\text{Mo}_6\text{O}_6(\mu_2\text{-O})_9(\text{Htrz})_4(\text{trz})_2] \cdot 49\text{H}_2\text{O}$  (4) respectively.

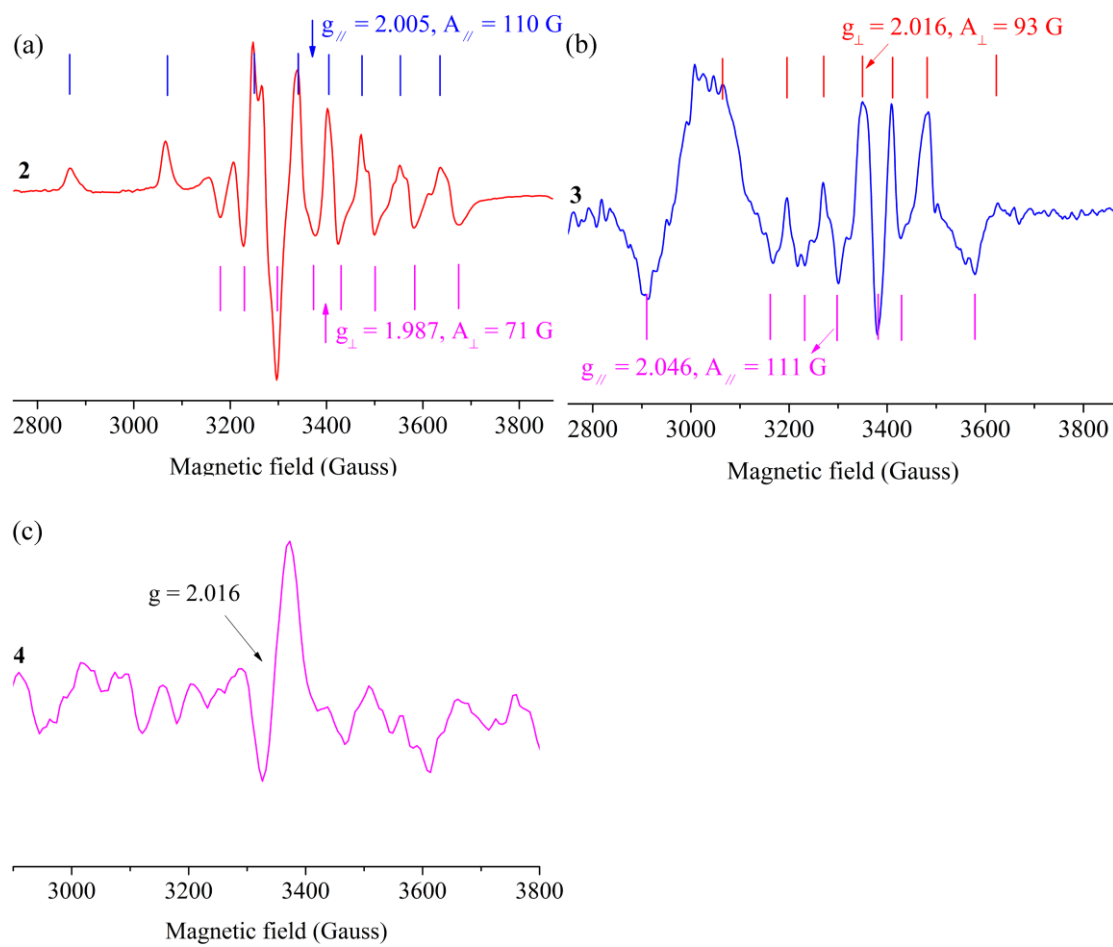

**Figure S18.** EPR spectra of solids **2** ~ **4** (a ~ c) at 110 K respectively.

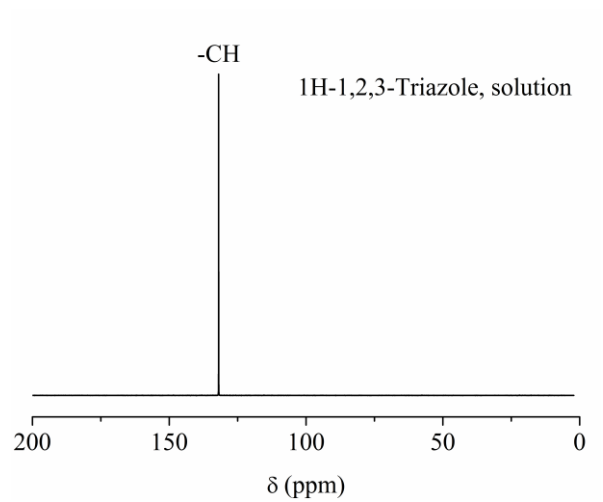

**Figure S19.** Solution  $^{13}\text{C}$  NMR spectrum of pure Htrz.

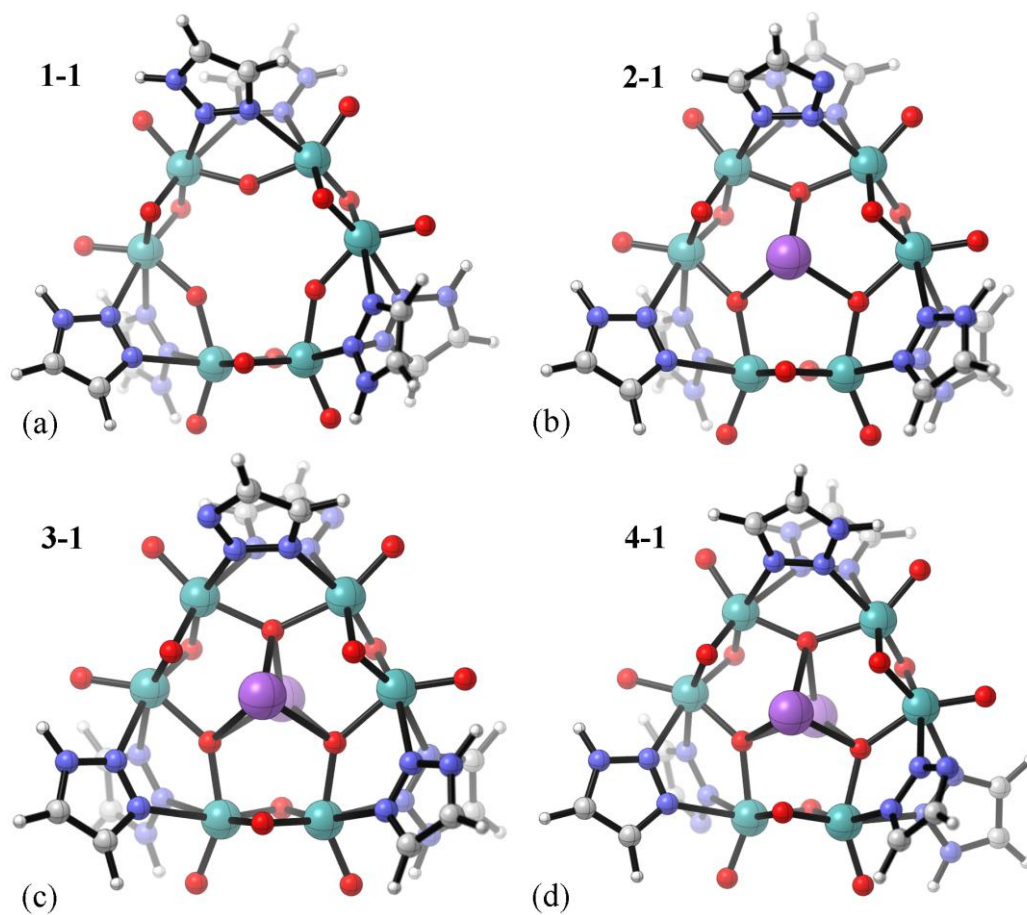

**Figure S20.** Optimized individual conformers of **1-1** ~ **4-1** (a ~ d) respectively.



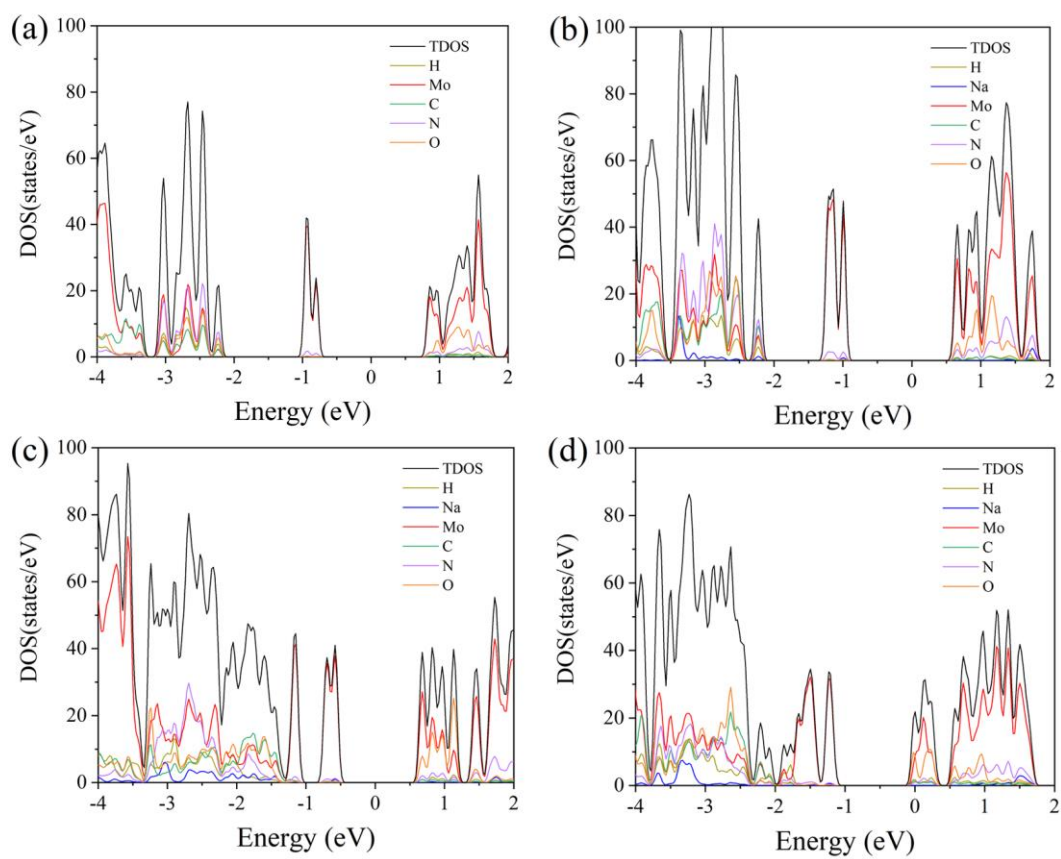

**Figure S21.** Local density of state (LDOS) and total density of state (TDOS) plots for compounds **1** ~ **4** (a ~ d), respectively.

**Table S1.** Crystallographic data and structural refinements for complexes [Mo<sub>6</sub>O<sub>6</sub>(μ<sub>2</sub>-O)<sub>9</sub>(Htrz)<sub>6</sub>] · 15H<sub>2</sub>O (**1**), Na[Mo<sub>6</sub>O<sub>6</sub>(μ<sub>2</sub>-O)<sub>9</sub>(Htrz)<sub>5</sub>(trz)] · 12H<sub>2</sub>O (**2**), Na<sub>2</sub>[Mo<sub>6</sub>O<sub>6</sub>(μ<sub>2</sub>-O)<sub>9</sub>(Htrz)<sub>4</sub>(trz)<sub>2</sub>] · 10H<sub>2</sub>O (**3**) and Na<sub>2</sub>[Mo<sub>6</sub>O<sub>6</sub>(μ<sub>2</sub>-O)<sub>9</sub>(Htrz)<sub>4</sub>(trz)<sub>2</sub>] · 49H<sub>2</sub>O (**4**) respectively.

| Identification codes             | <b>1</b>                                                                        | <b>2</b>                                                                          | <b>3</b>                                                                                        | <b>4</b>                                                                                         |
|----------------------------------|---------------------------------------------------------------------------------|-----------------------------------------------------------------------------------|-------------------------------------------------------------------------------------------------|--------------------------------------------------------------------------------------------------|
| Empirical formula                | C <sub>12</sub> H <sub>48</sub> Mo <sub>6</sub> N <sub>18</sub> O <sub>30</sub> | C <sub>12</sub> H <sub>41</sub> Mo <sub>6</sub> N <sub>18</sub> NaO <sub>27</sub> | C <sub>12</sub> H <sub>36</sub> Mo <sub>6</sub> N <sub>18</sub> Na <sub>2</sub> O <sub>25</sub> | C <sub>12</sub> H <sub>114</sub> Mo <sub>6</sub> N <sub>18</sub> Na <sub>2</sub> O <sub>64</sub> |
| Formula weight                   | 1500.3                                                                          | 1468.2                                                                            | 1454.1                                                                                          | 2156.7                                                                                           |
| Temperature/K                    | 100.0(1)                                                                        | 100.0(1)                                                                          | 228.0(1)                                                                                        | 223.1(1)                                                                                         |
| Crystal system                   | triclinic                                                                       | monoclinic                                                                        | monoclinic                                                                                      | monoclinic                                                                                       |
| Space group                      | <i>P</i> $\bar{1}$                                                              | <i>C</i> 2/ <i>m</i>                                                              | <i>C</i> 2/ <i>m</i>                                                                            | <i>P</i> 2 <sub>1</sub> / <i>c</i>                                                               |
| <i>a</i> /Å                      | 10.7349(4)                                                                      | 25.0562(5)                                                                        | 38.068(3)                                                                                       | 9.2936(3)                                                                                        |
| <i>b</i> /Å                      | 11.4546(4)                                                                      | 20.0622(3)                                                                        | 20.884(2)                                                                                       | 35.6369(1)                                                                                       |
| <i>c</i> /Å                      | 19.5856(6)                                                                      | 11.1147(2)                                                                        | 9.5142(7)                                                                                       | 21.4763(7)                                                                                       |
| <i>α</i> /°                      | 89.050(3)                                                                       | 90                                                                                | 90                                                                                              | 90                                                                                               |
| <i>β</i> /°                      | 75.634(3)                                                                       | 94.591(2)                                                                         | 96.778(7)                                                                                       | 92.824(3)                                                                                        |
| <i>γ</i> /°                      | 81.845(3)                                                                       | 90                                                                                | 90                                                                                              | 90                                                                                               |
| Volume/Å <sup>3</sup>            | 2309.0(1)                                                                       | 5569.2(2)                                                                         | 7511.0(1)                                                                                       | 7104.2(4)                                                                                        |
| <i>Z</i>                         | 2                                                                               | 4                                                                                 | 4                                                                                               | 4                                                                                                |
| $\rho_{\text{calc}}/\text{cm}^3$ | 1.769                                                                           | 1.530                                                                             | 1.168                                                                                           | 1.236                                                                                            |
| $\mu/\text{mm}^{-1}$             | 13.544                                                                          | 11.356                                                                            | 1.029                                                                                           | 1.088                                                                                            |
| <i>F</i> (000)                   | 1176.0                                                                          | 2452.0                                                                            | 2526.0                                                                                          | 2528.0                                                                                           |
| Crystal size/mm <sup>3</sup>     | 0.10 × 0.02 × 0.01                                                              | 0.20 × 0.20 × 0.1                                                                 | 0.30 × 0.10 × 0.05                                                                              | 0.40 × 0.20 × 0.08                                                                               |
| Radiation                        | Cu Kα (λ = 1.54184)                                                             | Cu Kα (λ = 1.54184)                                                               | Mo Kα (λ = 0.71073)                                                                             | Mo Kα (λ = 0.71073)                                                                              |
| 2θ range for data collection/°   | 7.798 to 149.72                                                                 | 5.65 to 132.922                                                                   | 4.456 to 56.94                                                                                  | 4.388 to 54.468                                                                                  |

|                                                      |                                                                             |                                                                             |                                                                             |                                                                              |
|------------------------------------------------------|-----------------------------------------------------------------------------|-----------------------------------------------------------------------------|-----------------------------------------------------------------------------|------------------------------------------------------------------------------|
| Index ranges                                         | -13 ≤ <i>h</i> ≤ 13,<br>-14 ≤ <i>k</i> ≤ 13,<br>-24 ≤ <i>l</i> ≤ 23         | -29 ≤ <i>h</i> ≤ 29,<br>-23 ≤ <i>k</i> ≤ 23,<br>-13 ≤ <i>l</i> ≤ 12         | -49 ≤ <i>h</i> ≤ 48,<br>-26 ≤ <i>k</i> ≤ 27,<br>-11 ≤ <i>l</i> ≤ 11         | -11 ≤ <i>h</i> ≤ 11,<br>-42 ≤ <i>k</i> ≤ 45,<br>-26 ≤ <i>l</i> ≤ 26          |
| Reflections collected                                | 26401                                                                       | 23822                                                                       | 30018                                                                       | 83022                                                                        |
| Independent reflections                              | 9024 [ <i>R</i> <sub>int</sub> = 0.0795,<br><i>R</i> <sub>σ</sub> = 0.0702] | 5004 [ <i>R</i> <sub>int</sub> = 0.0258,<br><i>R</i> <sub>σ</sub> = 0.0175] | 8780 [ <i>R</i> <sub>int</sub> = 0.1157,<br><i>R</i> <sub>σ</sub> = 0.1325] | 14721 [ <i>R</i> <sub>int</sub> = 0.1179,<br><i>R</i> <sub>σ</sub> = 0.1085] |
| Data/restraints/parameters                           | 9024/0/469                                                                  | 5004/16/259                                                                 | 8780/7/267                                                                  | 14721/16/505                                                                 |
| Goodness-of-fit on <i>F</i> <sup>2</sup>             | 1.106                                                                       | 1.039                                                                       | 0.891                                                                       | 0.982                                                                        |
| Final <i>R</i> indexes [ <i>I</i> ≥ 2σ ( <i>I</i> )] | <i>R</i> <sub>1</sub> = 0.0606,<br><i>wR</i> <sub>2</sub> = 0.1671          | <i>R</i> <sub>1</sub> = 0.0561,<br><i>wR</i> <sub>2</sub> = 0.1692          | <i>R</i> <sub>1</sub> = 0.0678,<br><i>wR</i> <sub>2</sub> = 0.1420          | <i>R</i> <sub>1</sub> = 0.0847,<br><i>wR</i> <sub>2</sub> = 0.2081           |
| Final <i>R</i> indexes [all data]                    | <i>R</i> <sub>1</sub> = 0.0694,<br><i>wR</i> <sub>2</sub> = 0.1741          | <i>R</i> <sub>1</sub> = 0.0617,<br><i>wR</i> <sub>2</sub> = 0.1772          | <i>R</i> <sub>1</sub> = 0.1377,<br><i>wR</i> <sub>2</sub> = 0.1685          | <i>R</i> <sub>1</sub> = 0.1322,<br><i>wR</i> <sub>2</sub> = 0.2344           |
| Largest diff. peak/hole/e · Å <sup>-3</sup>          | 2.02/-1.42                                                                  | 1.68/-2.50                                                                  | 0.91/-0.47                                                                  | 0.85/-0.55                                                                   |

**Table S2.** Selected hydrogen bond distances ( Å ) and angles ( ° ) in [Mo<sub>6</sub>O<sub>6</sub>(μ<sub>2</sub>-O)<sub>9</sub>(Htrz)<sub>6</sub>] · 15H<sub>2</sub>O (**1**).

| D-H ...A                   | D-H(Å) | H ...A(Å) | D ...A(Å) | D-H ...A( ° ) |
|----------------------------|--------|-----------|-----------|---------------|
| C1-H1 ...N6 <sup>a</sup>   | 0.93   | 2.57      | 3.489(1)  | 169           |
| C3-H3A ...O2 <sup>b</sup>  | 0.93   | 2.45      | 3.130(1)  | 130           |
| C4-H4 ...O7 <sup>b</sup>   | 0.93   | 2.60      | 3.480(1)  | 158           |
| C6-H6A ...O3 <sup>c</sup>  | 0.93   | 2.54      | 3.337(1)  | 143           |
| C9-H9A ...N18 <sup>d</sup> | 0.93   | 2.57      | 3.480(1)  | 167           |
| C11-H11 ...O3 <sup>e</sup> | 0.93   | 2.55      | 3.132(1)  | 121           |

Symmetry codes: (a) 1 - x, 2 - y, 1 - z; (b) 1 - x, 1 - y, 1 - z; (c) 2 - x, 1 - y, -z; (d) 1 - x, 2 - y, -z; (e) 1 - x, 1 - y, -z.

**Table S3.** Selected hydrogen bond distances ( Å ) and angles ( ° ) in Na[Mo<sub>6</sub>O<sub>6</sub>(μ<sub>2</sub>-O)<sub>9</sub>(Htrz)<sub>5</sub>(trz)] · 12H<sub>2</sub>O (**2**).

| D–H ··· A                 | D–H(Å) | H ··· A(Å) | D ··· A(Å) | D–H ··· A(°) |
|---------------------------|--------|------------|------------|--------------|
| C1–H1 ··· O3 <sup>a</sup> | 0.93   | 2.53       | 3.196(1)   | 129          |
| C2–H2 ··· O2 <sup>a</sup> | 0.93   | 2.54       | 3.299(1)   | 140          |

Symmetric codes: (a)  $\frac{1}{2} - x, \frac{1}{2} - y, 1 - z$ .

**Table S4.** Comparisons of Na–O distances in **2** ~ **4** and some classical crown ethers.

| Compounds                                           | Receptors                      | Na–O (Å)               |
|-----------------------------------------------------|--------------------------------|------------------------|
| <b>2</b>                                            |                                | 2.226(4) <sub>av</sub> |
| <b>3</b>                                            | Mo <sub>6</sub> O <sub>9</sub> | 2.561(6) <sub>av</sub> |
| <b>4</b>                                            |                                | 2.582(7) <sub>av</sub> |
| <b>1</b> <b>HB</b> 2NaPF <sub>6</sub> <sup>18</sup> | benzo-15-crown-5               | 2.302(1) ~ 2.477(1)    |
| <b>2</b> NaClO <sub>4</sub> <sup>19</sup>           | aza-18-crown-6                 | 2.430 ~ 2.581          |
| <b>1</b> NaNO <sub>2</sub> <sup>20</sup>            | aza-18-crown-6                 | 2.44 <sub>av</sub>     |

**HB** = hydrogen bond

**Table S5.** Selected bond distances ( Å ) and angles ( ° ) in [Mo<sub>6</sub>O<sub>6</sub>(μ<sub>2</sub>-O)<sub>9</sub>(Htrz)<sub>6</sub>] · 15H<sub>2</sub>O (**1**).

| <b>1</b>    |           |             |           |
|-------------|-----------|-------------|-----------|
| Mo1–Mo2     | 2.570(4)  | Mo5–O13     | 1.954(6)  |
| Mo1–O8      | 1.967(7)  | Mo5–O14     | 1.958(6)  |
| Mo1–O7      | 1.955(7)  | Mo5–O5      | 1.712(6)  |
| Mo1–O15     | 1.958(7)  | Mo5–N17     | 2.238(6)  |
| Mo1–O1      | 1.728(8)  | Mo5–N13     | 2.214(7)  |
| Mo1–N4      | 2.245(7)  | Mo4–O11     | 1.955(6)  |
| Mo1–N2      | 2.240(9)  | Mo4–O12     | 2.071(5)  |
| Mo2–O8      | 1.974(5)  | Mo4–O10     | 1.951(6)  |
| Mo2–O9      | 1.973(5)  | Mo4–O4      | 1.712(6)  |
| Mo2–O7      | 1.969(6)  | Mo4–N16     | 2.221(7)  |
| Mo2–O2      | 1.707(6)  | Mo4–N14     | 2.202(7)  |
| Mo2–N10     | 2.212(7)  | Mo6–O15     | 1.968(5)  |
| Mo2–N8      | 2.217(7)  | Mo6–O13     | 1.951(6)  |
| Mo2–Mo7     | 2.572(5)  | Mo6–O14     | 1.964(6)  |
| Mo3–Mo4     | 2.5700(8) | Mo6–O6      | 1.711(6)  |
| Mo3–O9      | 1.985(5)  | Mo6–N5      | 2.237(6)  |
| Mo3–O11     | 1.967(5)  | Mo6–N1      | 2.224(7)  |
| Mo3–O10     | 1.965(6)  | O8–Mo7      | 1.961(7)  |
| Mo3–O3      | 1.729(6)  | O7–Mo7      | 1.962(7)  |
| Mo3–N11     | 2.227(7)  | O15–Mo7     | 1.944(7)  |
| Mo3–N7      | 2.222(7)  | O1–Mo7      | 1.741(7)  |
| Mo5–Mo6     | 2.5569(9) | N4–Mo7      | 2.246(8)  |
| Mo5–O12     | 2.059(5)  | N2–Mo7      | 2.230(8)  |
|             |           |             |           |
| O8–Mo1–Mo2  | 49.41(2)  | O10–Mo4–Mo3 | 49.21(2)  |
| O8–Mo1–N4   | 164.6(3)  | O10–Mo4–O11 | 97.9(2)   |
| O8–Mo1–N2   | 86.6(3)   | O10–Mo4–O12 | 87.7(2)   |
| O7–Mo1–Mo2  | 49.34(2)  | O10–Mo4–N16 | 88.6(2)   |
| O7–Mo1–O8   | 98.3(3)   | O10–Mo4–N14 | 162.5(3)  |
| O7–Mo1–O15  | 91.6(3)   | O4–Mo4–Mo3  | 107.8(2)  |
| O7–Mo1–N4   | 87.3(3)   | O4–Mo4–O11  | 105.5(3)  |
| O7–Mo1–N2   | 167.1(3)  | O4–Mo4–O12  | 159.6(2)  |
| O15–Mo1–Mo2 | 96.7(2)   | O4–Mo4–O10  | 105.5(3)  |
| O15–Mo1–O8  | 90.0(3)   | O4–Mo4–N16  | 88.6(3)   |
| O15–Mo1–N4  | 75.4(3)   | O4–Mo4–N14  | 89.9(3)   |
| O15–Mo1–N2  | 76.5(3)   | N16–Mo4–Mo3 | 137.11(2) |
| O1–Mo1–Mo2  | 106.1(3)  | N14–Mo4–Mo3 | 134.11(2) |
| O1–Mo1–O8   | 103.8(3)  | N14–Mo4–N16 | 83.5(2)   |
| O1–Mo1–O7   | 104.0(3)  | O15–Mo6–Mo5 | 96.50(2)  |
| O1–Mo1–O15  | 157.2(3)  | O15–Mo6–N5  | 75.3(2)   |
| O1–Mo1–N4   | 88.6(3)   | O15–Mo6–N1  | 76.6(2)   |
| O1–Mo1–N2   | 86.2(3)   | O13–Mo6–Mo5 | 49.13(2)  |
| N4–Mo1–Mo2  | 136.1(3)  | O13–Mo6–O15 | 89.8(2)   |
| N2–Mo1–Mo2  | 135.8(3)  | O13–Mo6–O14 | 97.8(2)   |
| N2–Mo1–N4   | 85.1(3)   | O13–Mo6–N5  | 164.6(2)  |
| O8–Mo2–Mo1  | 49.2(2)   | O13–Mo6–N1  | 86.5(3)   |

|             |           |             |           |
|-------------|-----------|-------------|-----------|
| O8–Mo2–N10  | 165.7(2)  | O14–Mo6–Mo5 | 49.22(2)  |
| O8–Mo2–N8   | 88.7(2)   | O14–Mo6–O15 | 90.6(2)   |
| O8–Mo2–Mo7  | 48.97(2)  | O14–Mo6–N5  | 86.4(2)   |
| O9–Mo2–Mo1  | 95.51(2)  | O14–Mo6–N1  | 166.6(2)  |
| O9–Mo2–O8   | 89.9(2)   | O6–Mo6–Mo5  | 105.2(2)  |
| O9–Mo2–N10  | 76.4(2)   | O6–Mo6–O15  | 158.3(3)  |
| O9–Mo2–N8   | 75.9(2)   | O6–Mo6–O13  | 104.3(3)  |
| O9–Mo2–Mo7  | 95.18(2)  | O6–Mo6–O14  | 103.4(3)  |
| O7–Mo2–Mo1  | 48.86(2)  | O6–Mo6–N5   | 89.0(3)   |
| O7–Mo2–O8   | 97.6(2)   | O6–Mo6–N1   | 87.7(3)   |
| O7–Mo2–O9   | 90.2(2)   | N5–Mo6–Mo5  | 135.15(2) |
| O7–Mo2–N10  | 86.7(2)   | N1–Mo6–Mo5  | 135.42(2) |
| O7–Mo2–N8   | 164.8(2)  | N1–Mo6–N5   | 86.4(3)   |
| O7–Mo2–Mo7  | 49.01(2)  | Mo1–O8–Mo2  | 81.4(2)   |
| O2–Mo2–Mo1  | 107.0(2)  | Mo7–O8–Mo2  | 81.6(2)   |
| O2–Mo2–O8   | 103.3(3)  | Mo2–O9–Mo3  | 131.4(3)  |
| O2–Mo2–O9   | 157.4(3)  | Mo4–O11–Mo3 | 81.9(2)   |
| O2–Mo2–O7   | 105.7(2)  | Mo1–O7–Mo2  | 81.8(2)   |
| O2–Mo2–N10  | 88.5(3)   | Mo7–O7–Mo2  | 81.7(3)   |
| O2–Mo2–N8   | 86.1(3)   | Mo1–O15–Mo6 | 132.0(3)  |
| O2–Mo2–Mo7  | 107.3(2)  | Mo7–O15–Mo6 | 132.0(3)  |
| N10–Mo2–Mo1 | 135.1(2)  | Mo5–O12–Mo4 | 127.6(3)  |
| N10–Mo2–N8  | 84.1(3)   | Mo6–O13–Mo5 | 81.8(2)   |
| N10–Mo2–Mo7 | 135.2(2)  | Mo5–O14–Mo6 | 81.4(2)   |
| N8–Mo2–Mo1  | 137.4(2)  | Mo4–O10–Mo3 | 82.1(2)   |
| N8–Mo2–Mo7  | 137.2(2)  | N18–N17–Mo5 | 125.8(5)  |
| O9–Mo3–Mo4  | 96.48(2)  | N16–N17–Mo5 | 122.7(5)  |
| O9–Mo3–N11  | 76.2(2)   | N5–N4–Mo1   | 120.3(5)  |
| O9–Mo3–N7   | 76.6(2)   | N5–N4–Mo7   | 119.8(5)  |
| O11–Mo3–Mo4 | 48.86(2)  | C4–N4–Mo1   | 132.8(6)  |
| O11–Mo3–O9  | 89.9(2)   | C4–N4–Mo7   | 133.3(6)  |
| O11–Mo3–N11 | 165.3(2)  | N17–N16–Mo4 | 121.9(5)  |
| O11–Mo3–N7  | 88.1(2)   | C12–N16–Mo4 | 131.7(6)  |
| O10–Mo3–Mo4 | 48.74(2)  | N4–N5–Mo6   | 120.5(5)  |
| O10–Mo3–O9  | 90.6(2)   | N6–N5–Mo6   | 127.9(5)  |
| O10–Mo3–O11 | 97.0(2)   | N11–N10–Mo2 | 121.0(5)  |
| O10–Mo3–N11 | 88.1(2)   | C8–N10–Mo2  | 130.3(6)  |
| O10–Mo3–N7  | 166.2(2)  | N7–N8–Mo2   | 121.3(5)  |
| O3–Mo3–Mo4  | 106.58(2) | N9–N8–Mo2   | 129.1(5)  |
| O3–Mo3–O9   | 156.9(2)  | N10–N11–Mo3 | 119.7(5)  |
| O3–Mo3–O11  | 104.6(3)  | N12–N11–Mo3 | 131.8(6)  |
| O3–Mo3–O10  | 105.0(3)  | N8–N7–Mo3   | 119.6(5)  |
| O3–Mo3–N11  | 87.2(3)   | C6–N7–Mo3   | 132.9(5)  |
| O3–Mo3–N7   | 85.9(3)   | N14–N13–Mo5 | 121.9(5)  |
| N11–Mo3–Mo4 | 136.49(2) | C10–N13–Mo5 | 130.2(7)  |
| N7–Mo3–Mo4  | 136.75(2) | N13–N14–Mo4 | 122.6(5)  |
| N7–Mo3–N11  | 84.0(2)   | N15–N14–Mo4 | 126.9(6)  |
| O12–Mo5–Mo6 | 93.22(2)  | N1–N2–Mo1   | 120.0(5)  |
| O12–Mo5–N17 | 75.1(2)   | N1–N2–Mo7   | 119.7(5)  |
| O12–Mo5–N13 | 74.7(2)   | N3–N2–Mo1   | 130.3(6)  |



|             |           |             |          |
|-------------|-----------|-------------|----------|
| O13–Mo5–Mo6 | 49.05(2)  | N3–N2–Mo7   | 130.6(6) |
| O13–Mo5–O12 | 88.3(2)   | N2–N1–Mo6   | 120.0(5) |
| O13–Mo5–O14 | 97.9(2)   | C2–N1–Mo6   | 132.2(6) |
| O13–Mo5–N17 | 162.8(3)  | O8–Mo7–Mo2  | 49.38(2) |
| O13–Mo5–N13 | 85.9(3)   | O8–Mo7–O7   | 98.2(3)  |
| O14–Mo5–Mo6 | 49.40(2)  | O8–Mo7–N4   | 165.5(3) |
| O14–Mo5–O12 | 87.8(2)   | O8–Mo7–N2   | 87.0(3)  |
| O14–Mo5–N17 | 86.3(2)   | O7–Mo7–Mo2  | 49.26(2) |
| O14–Mo5–N13 | 162.0(3)  | O7–Mo7–N4   | 87.1(3)  |
| O5–Mo5–Mo6  | 107.0(2)  | O7–Mo7–N2   | 167.7(3) |
| O5–Mo5–O12  | 159.7(3)  | O15–Mo7–Mo2 | 97.0(2)  |
| O5–Mo5–O13  | 105.1(3)  | O15–Mo7–O8  | 90.6(3)  |
| O5–Mo5–O14  | 105.0(3)  | O15–Mo7–O7  | 91.8(3)  |
| O5–Mo5–N17  | 89.8(3)   | O15–Mo7–N4  | 75.7(3)  |
| O5–Mo5–N13  | 90.9(3)   | O15–Mo7–N2  | 77.0(3)  |
| N17–Mo5–Mo6 | 135.04(2) | O1–Mo7–Mo2  | 105.6(3) |
| N13–Mo5–Mo6 | 134.15(2) | O1–Mo7–O8   | 103.5(3) |
| N13–Mo5–N17 | 85.2(2)   | O1–Mo7–O7   | 103.2(3) |
| O11–Mo4–Mo3 | 49.27(2)  | O1–Mo7–O15  | 157.4(4) |
| O11–Mo4–O12 | 87.6(2)   | O1–Mo7–N4   | 88.3(3)  |
| O11–Mo4–N16 | 162.2(2)  | O1–Mo7–N2   | 86.1(3)  |
| O11–Mo4–N14 | 85.6(2)   | N4–Mo7–Mo2  | 135.9(3) |
| O12–Mo4–Mo3 | 92.61(1)  | N2–Mo7–Mo2  | 136.2(3) |
| O12–Mo4–N16 | 76.1(2)   | N2–Mo7–N4   | 85.3(3)  |
| O12–Mo4–N14 | 75.3(2)   |             |          |

**Table S6.** Selected bond distances ( Å ) and angles ( ° ) in Na[Mo<sub>6</sub>O<sub>6</sub>(μ<sub>2</sub>-O)<sub>9</sub>(Htrz)<sub>5</sub>(trz)] · 12H<sub>2</sub>O (2).

| <b>2</b>                  |           |                                        |           |
|---------------------------|-----------|----------------------------------------|-----------|
| Mo1–Mo1 <sup>1</sup>      | 2.5639(1) | Mo3–O8                                 | 1.934(6)  |
| Mo1–Na1                   | 3.273(6)  | Mo3–N9                                 | 2.173(7)  |
| Mo1–O6                    | 2.178(5)  | Mo3–N7                                 | 2.192(7)  |
| Mo1–O4                    | 1.933(5)  | Mo3–O3                                 | 1.690(6)  |
| Mo1–O5                    | 1.938(5)  | Mo2–Na1                                | 3.2603(2) |
| Mo1–O1                    | 1.682(6)  | Mo2–O6                                 | 2.184(5)  |
| Mo1–N4                    | 2.199(7)  | Mo2–O7                                 | 1.938(6)  |
| Mo1–N2                    | 2.212(7)  | Mo2–O8                                 | 1.939(6)  |
| Mo3–Mo2                   | 2.5652(9) | Mo2–N5                                 | 2.203(6)  |
| Mo3–Na1                   | 3.253(5)  | Mo2–N1                                 | 2.200(8)  |
| Mo3–O9                    | 2.177(4)  | Mo2–O2                                 | 1.690(6)  |
| Mo3–O7                    | 1.945(5)  |                                        |           |
| Mo1 <sup>1</sup> –Mo1–Na1 | 66.94(4)  | O2–Mo2–O7                              | 105.6(3)  |
| O6–Mo1–Mo1 <sup>1</sup>   | 89.62(1)  | O2–Mo2–O8                              | 105.5(3)  |
| O6–Mo1–Na1                | 25.91(2)  | O2–Mo2–N5                              | 92.0(3)   |
| O6–Mo1–N4                 | 77.2(2)   | O2–Mo2–N1                              | 91.1(3)   |
| O6–Mo1–N2                 | 76.3(2)   | Mo3 <sup>1</sup> –Na1–Mo3              | 70.71(1)  |
| O4–Mo1–Mo1 <sup>1</sup>   | 48.45(1)  | Mo3–Na1–Mo2                            | 46.39(5)  |
| O4–Mo1–Na1                | 80.0(2)   | Mo3 <sup>1</sup> –Na1–Mo2              | 115.67(2) |
| O4–Mo1–O6                 | 85.5(2)   | Mo3 <sup>1</sup> –Na1–Mo2 <sup>1</sup> | 46.39(5)  |
| O4–Mo1–O5                 | 96.1(2)   | Mo3–Na1–Mo2 <sup>1</sup>               | 115.67(2) |
| O4–Mo1–N4                 | 86.6(2)   | Mo2–Na1–Mo2 <sup>1</sup>               | 152.0(2)  |
| O4–Mo1–N2                 | 161.0(3)  | O6 <sup>1</sup> –Na1–Mo3               | 136.3(4)  |
| O5–Mo1–Mo1 <sup>1</sup>   | 48.58(1)  | O6 <sup>1</sup> –Na1–Mo3 <sup>1</sup>  | 79.6(2)   |
| O5–Mo1–Na1                | 59.6(2)   | O6–Na1–Mo3 <sup>1</sup>                | 136.3(4)  |
| O5–Mo1–O6                 | 83.7(3)   | O6–Na1–Mo3                             | 79.6(2)   |
| O5–Mo1–N4                 | 160.5(3)  | O6–Na1–Mo2 <sup>1</sup>                | 135.5(3)  |
| O5–Mo1–N2                 | 87.2(2)   | O6–Na1–Mo2                             | 36.59(2)  |
| O1–Mo1–Mo1 <sup>1</sup>   | 106.4(2)  | O6 <sup>1</sup> –Na1–Mo2               | 135.5(3)  |
| O1–Mo1–Na1                | 165.9(3)  | O6 <sup>1</sup> –Na1–Mo2 <sup>1</sup>  | 36.59(2)  |
| O1–Mo1–O6                 | 164.0(3)  | O9–Na1–Mo3                             | 36.37(1)  |
| O1–Mo1–O4                 | 105.2(3)  | O9–Na1–Mo3 <sup>1</sup>                | 36.37(1)  |
| O1–Mo1–O5                 | 106.5(3)  | O9–Na1–Mo2 <sup>1</sup>                | 79.37(1)  |
| O1–Mo1–N4                 | 91.3(3)   | O9–Na1–Mo2                             | 79.36(1)  |
| O1–Mo1–N2                 | 91.6(3)   | O5–Na1–Mo3                             | 144.64(7) |
| N4–Mo1–Mo1 <sup>1</sup>   | 134.33(2) | O5–Na1–Mo3 <sup>1</sup>                | 144.64(7) |
| N4–Mo1–Na1                | 102.16(2) | O5–Na1–Mo2                             | 98.94(1)  |
| N4–Mo1–N2                 | 84.2(3)   | O5–Na1–Mo2 <sup>1</sup>                | 98.94(1)  |
| N2–Mo1–Mo1 <sup>1</sup>   | 135.16(2) | O8–Na1–Mo3                             | 36.24(1)  |
| N2–Mo1–Na1                | 85.70(2)  | O8 <sup>1</sup> –Na1–Mo3               | 99.4(2)   |
| Mo2–Mo3–Na1               | 66.95(7)  | O8 <sup>1</sup> –Na1–Mo3 <sup>1</sup>  | 36.24(1)  |
| O9–Mo3–Mo2                | 89.8(2)   | O8–Na1–Mo3 <sup>1</sup>                | 99.4(2)   |
| O9–Mo3–Na1                | 26.0(2)   | O8 <sup>1</sup> –Na1–Mo2 <sup>1</sup>  | 36.27(1)  |
| O9–Mo3–N7                 | 76.1(3)   | O8–Na1–Mo2 <sup>1</sup>                | 145.1(2)  |
| O7–Mo3–Mo2                | 48.54(2)  | O1W–Na1–Mo3                            | 78.6(4)   |

|             |           |                          |           |
|-------------|-----------|--------------------------|-----------|
| O7–Mo3–Na1  | 79.65(2)  | O1W–Na1–Mo3 <sup>1</sup> | 78.6(4)   |
| O7–Mo3–O9   | 85.3(3)   | O1W–Na1–Mo2              | 77.52(1)  |
| O7–Mo3–N9   | 85.5(2)   | O1W–Na1–Mo2 <sup>1</sup> | 77.52(1)  |
| O7–Mo3–N7   | 160.8(2)  | O2W–Na1–Mo3 <sup>1</sup> | 103.3(4)  |
| O8–Mo3–Mo2  | 48.62(2)  | O2W–Na1–Mo3              | 103.3(4)  |
| O8–Mo3–Na1  | 59.96(2)  | O2W–Na1–Mo2 <sup>1</sup> | 102.74(1) |
| O8–Mo3–O9   | 84.1(3)   | O2W–Na1–Mo2              | 102.74(1) |
| O8–Mo3–O7   | 96.2(2)   | Mo1–O6–Mo2               | 119.3(2)  |
| O8–Mo3–N9   | 160.0(3)  | Na1–O6–Mo1               | 118.2(3)  |
| O8–Mo3–N7   | 86.7(2)   | Na1–O6–Mo2               | 117.1(3)  |
| N9–Mo3–Mo2  | 133.21(2) | O1W–O6–Mo1               | 115.4(4)  |
| N9–Mo3–Na1  | 101.04(2) | O1W–O6–Mo2               | 116.6(4)  |
| N9–Mo3–O9   | 76.2(3)   | Mo3 <sup>1</sup> –O9–Mo3 | 119.7(4)  |
| N9–Mo3–N7   | 85.4(2)   | Na1–O9–Mo3               | 117.6(3)  |
| N7–Mo3–Mo2  | 134.65(2) | Na1–O9–Mo3 <sup>1</sup>  | 117.6(3)  |
| N7–Mo3–Na1  | 85.5(2)   | O1W–O9–Mo3               | 115.9(2)  |
| O3–Mo3–Mo2  | 106.4(2)  | O1W–O9–Mo3 <sup>1</sup>  | 115.9(2)  |
| O3–Mo3–Na1  | 166.3(3)  | Mo1–O4–Mo1 <sup>1</sup>  | 83.1(3)   |
| O3–Mo3–O9   | 163.8(3)  | Mo2–O7–Mo3               | 82.7(2)   |
| O3–Mo3–O7   | 105.2(3)  | Mo1–O5–Mo1 <sup>1</sup>  | 82.8(3)   |
| O3–Mo3–O8   | 106.5(3)  | Mo1–O5–Na1               | 84.3(3)   |
| O3–Mo3–N9   | 92.2(3)   | Mo1 <sup>1</sup> –O5–Na1 | 84.3(3)   |
| O3–Mo3–N7   | 92.0(3)   | Mo3–O8–Mo2               | 82.9(2)   |
| Mo3–Mo2–Na1 | 66.66(1)  | Mo3–O8–Na1               | 83.8(2)   |
| O6–Mo2–Mo3  | 89.76(1)  | Mo2–O8–Na1               | 83.97(2)  |
| O6–Mo2–Na1  | 26.29(2)  | N5–N4–Mo1                | 124.0(5)  |
| O6–Mo2–N5   | 77.2(2)   | C4–N4–Mo1                | 128.6(6)  |
| O6–Mo2–N1   | 76.8(2)   | N9 <sup>1</sup> –N9–Mo3  | 124.18(2) |
| O7–Mo2–Mo3  | 48.78(2)  | N10–N9–Mo3               | 127.5(6)  |
| O7–Mo2–Na1  | 79.55(2)  | C7–N9–Mo3                | 127.5(6)  |
| O7–Mo2–O6   | 85.1(2)   | N7 <sup>1</sup> –N7–Mo3  | 123.37(2) |
| O7–Mo2–O8   | 96.3(2)   | N8–N7–Mo3                | 125.8(8)  |
| O7–Mo2–N5   | 85.8(2)   | C5–N7–Mo3                | 125.8(8)  |
| O7–Mo2–N1   | 161.1(2)  | N1–N2–Mo1                | 123.8(5)  |
| O8–Mo2–Mo3  | 48.44(2)  | N3–N2–Mo1                | 125.2(6)  |
| O8–Mo2–Na1  | 59.8(2)   | N4–N5–Mo2                | 122.9(5)  |
| O8–Mo2–O6   | 84.2(2)   | N6–N5–Mo2                | 126.8(6)  |
| O8–Mo2–N5   | 161.1(3)  | N2–N1–Mo2                | 123.2(5)  |
| O8–Mo2–N1   | 87.5(3)   | C2–N1–Mo2                | 132.5(7)  |
| N5–Mo2–Mo3  | 133.97(2) | O8–Na1–Mo2               | 36.27(1)  |
| N5–Mo2–Na1  | 102.43(2) | O8 <sup>1</sup> –Na1–Mo2 | 145.1(2)  |
| N1–Mo2–Mo3  | 135.34(2) | O2–Mo2–Mo3               | 105.9(2)  |
| N1–Mo2–Na1  | 86.5(2)   | O2–Mo2–Na1               | 165.1(3)  |
| N1–Mo2–N5   | 84.8(3)   | O2–Mo2–O6                | 164.3(3)  |

Symmetric codes: <sup>1</sup> + x, 1 – y, +z.

**Table S7.** Selected bond distances ( Å ) and angles ( ° ) in  $\text{Na}_2[\text{Mo}_6\text{O}_6(\mu_2\text{-O})_9(\text{Htrz})_4(\text{trz})_2] \cdot 10\text{H}_2\text{O}$  (**3**).

| <b>3</b>             |           |                                        |           |
|----------------------|-----------|----------------------------------------|-----------|
| Mo3–Mo2              | 2.5809(1) | Mo1–O4                                 | 1.965(5)  |
| Mo3–Na1              | 3.503(3)  | Mo1–O5                                 | 1.955(5)  |
| Mo3–Na2              | 3.573(4)  | Mo1–N1                                 | 2.231(7)  |
| Mo3–O9               | 1.958(2)  | Mo1–O1                                 | 1.717(5)  |
| Mo3–O7               | 1.961(4)  | Mo1–N5                                 | 2.199(8)  |
| Mo3–O8               | 1.946(5)  | Mo2–Na1                                | 3.5121(2) |
| Mo3–N9               | 2.246(5)  | Mo2–Na2                                | 3.554(2)  |
| Mo3–N7               | 2.193(6)  | Mo2–O6                                 | 1.955(5)  |
| Mo3–O3               | 1.672(5)  | Mo2–O7                                 | 1.982(5)  |
| Mo1–Mo1 <sup>1</sup> | 2.5786(2) | Mo2–O8                                 | 1.960(5)  |
| Mo1–Na1              | 3.506(4)  | Mo2–N2                                 | 2.237(7)  |
| Mo1–Na2              | 3.519(4)  | Mo2–O2                                 | 1.704(5)  |
| Mo1–O6               | 1.950(4)  | Mo2–N4                                 | 2.239(7)  |
| Mo2–Mo3–Na1          | 68.60(5)  | N4–Mo2–Na1                             | 116.9(2)  |
| Mo2–Mo3–Na2          | 68.38(5)  | N4–Mo2–Na2                             | 78.9(2)   |
| Na1–Mo3–Na2          | 57.22(9)  | Mo3–Na1–Mo3 <sup>1</sup>               | 61.44(6)  |
| O9–Mo3–Mo2           | 96.20(2)  | Mo3–Na1–Mo1                            | 99.65(7)  |
| O9–Mo3–Na1           | 41.28(2)  | Mo3 <sup>1</sup> –Na1–Mo1              | 122.91(1) |
| O9–Mo3–Na2           | 40.95(2)  | Mo3–Na1–Mo1 <sup>1</sup>               | 122.91(1) |
| O9–Mo3–O7            | 90.5(2)   | Mo3 <sup>1</sup> –Na1–Mo1 <sup>1</sup> | 99.64(7)  |
| O9–Mo3–N9            | 76.2(2)   | Mo1–Na1–Mo1 <sup>1</sup>               | 43.15(5)  |
| O9–Mo3–N7            | 76.8(2)   | Na2–Na1–Mo3 <sup>1</sup>               | 62.43(8)  |
| O7–Mo3–Mo2           | 49.47(1)  | Na2–Na1–Mo3                            | 62.43(8)  |
| O7–Mo3–Na1           | 49.24(1)  | Na2–Na1–Mo1                            | 61.36(9)  |
| O7–Mo3–Na2           | 94.02(1)  | Na2–Na1–Mo1 <sup>1</sup>               | 61.36(9)  |
| O7–Mo3–N9            | 165.17(2) | O9–Na1–Mo3 <sup>1</sup>                | 32.45(5)  |
| O7–Mo3–N7            | 86.7(2)   | O9–Na1–Mo3                             | 32.45(5)  |
| O8–Mo3–Mo2           | 48.87(1)  | O9–Na1–Mo1                             | 104.29(2) |
| O8–Mo3–Na1           | 94.41(1)  | O9–Na1–Mo1 <sup>1</sup>                | 104.29(2) |
| O8–Mo3–Na2           | 49.85(2)  | O6–Na1–Mo3 <sup>1</sup>                | 104.88(2) |
| O8–Mo3–O9            | 90.8(2)   | O6 <sup>1</sup> –Na1–Mo3               | 104.88(2) |
| O8–Mo3–O7            | 97.93(2)  | O6 <sup>1</sup> –Na1–Mo3 <sup>1</sup>  | 67.42(1)  |
| O8–Mo3–N9            | 88.8(2)   | O6–Na1–Mo3                             | 67.42(1)  |
| O8–Mo3–N7            | 166.8(2)  | O6 <sup>1</sup> –Na1–Mo1 <sup>1</sup>  | 32.23(1)  |
| N9–Mo3–Mo2           | 137.28(1) | O6 <sup>1</sup> –Na1–Mo1               | 67.37(1)  |
| N9–Mo3–Na1           | 117.31(1) | O6–Na1–Mo1 <sup>1</sup>                | 67.37(1)  |
| N9–Mo3–Na2           | 80.20(2)  | O6–Na1–Mo1                             | 32.23(1)  |
| N7–Mo3–Mo2           | 135.93(1) | O7–Na1–Mo3                             | 33.76(1)  |
| N7–Mo3–Na1           | 79.20(2)  | O7–Na1–Mo3 <sup>1</sup>                | 92.85(1)  |
| N7–Mo3–Na2           | 117.68(2) | O7 <sup>1</sup> –Na1–Mo3 <sup>1</sup>  | 33.76(1)  |
| N7–Mo3–N9            | 84.0(2)   | O7 <sup>1</sup> –Na1–Mo3               | 92.85(1)  |
| O3–Mo3–Mo2           | 107.0(2)  | O7–Na1–Mo1 <sup>1</sup>                | 133.67(1) |
| O3–Mo3–Na1           | 150.7(2)  | O7 <sup>1</sup> –Na1–Mo1 <sup>1</sup>  | 93.22(1)  |
| O3–Mo3–Na2           | 150.2(2)  | O7 <sup>1</sup> –Na1–Mo1               | 133.67(1) |
| O3–Mo3–O9            | 156.8(3)  | O7–Na1–Mo1                             | 93.22(1)  |

|                           |           |                                        |           |
|---------------------------|-----------|----------------------------------------|-----------|
| O3–Mo3–O7                 | 104.8(2)  | O4–Na1–Mo3 <sup>1</sup>                | 133.43(1) |
| O3–Mo3–O8                 | 103.9(3)  | O4–Na1–Mo3                             | 133.44(1) |
| O3–Mo3–N9                 | 86.2(2)   | O4–Na1–Mo1                             | 33.83(1)  |
| O3–Mo3–N7                 | 86.7(3)   | O4–Na1–Mo1 <sup>1</sup>                | 33.83(1)  |
| Mo1 <sup>1</sup> –Mo1–Na1 | 68.43(3)  | O1W–Na1–Mo3 <sup>1</sup>               | 114.2(3)  |
| Mo1 <sup>1</sup> –Mo1–Na2 | 68.51(3)  | O1W–Na1–Mo3                            | 114.2(3)  |
| Na1–Mo1–Na2               | 57.68(9)  | O1W–Na1–Mo1                            | 122.3(3)  |
| O6–Mo1–Mo1 <sup>1</sup>   | 96.58(1)  | O1W–Na1–Mo1 <sup>1</sup>               | 122.3(3)  |
| O6–Mo1–Na1                | 41.29(1)  | Mo1–Na2–Mo1 <sup>1</sup>               | 42.98(5)  |
| O6–Mo1–Na2                | 41.88(1)  | Mo1–Na2–Mo2                            | 60.85(5)  |
| O6–Mo1–O4                 | 90.7(2)   | Mo1 <sup>1</sup> –Na2–Mo2              | 98.56(9)  |
| O6–Mo1–O5                 | 90.3(2)   | Na1–Na2–Mo1                            | 60.96(9)  |
| O6–Mo1–N1                 | 76.7(2)   | Na1–Na2–Mo1 <sup>1</sup>               | 60.96(9)  |
| O6–Mo1–N5                 | 75.5(3)   | Na1–Na2–Mo2                            | 60.72(6)  |
| O4–Mo1–Mo1 <sup>1</sup>   | 49.01(1)  | O9–Na2–Mo1                             | 102.83(2) |
| O4–Mo1–Na1                | 49.42(2)  | O9–Na2–Mo1 <sup>1</sup>                | 102.83(2) |
| O4–Mo1–Na2                | 94.38(2)  | O9–Na2–Mo2                             | 66.08(8)  |
| O4–Mo1–N1                 | 87.5(2)   | O6–Na2–Mo1                             | 32.19(1)  |
| O4–Mo1–N5                 | 165.2(3)  | O6 <sup>1</sup> –Na2–Mo1               | 66.89(1)  |
| O5–Mo1–Mo1 <sup>1</sup>   | 48.73(1)  | O6 <sup>1</sup> –Na2–Mo1 <sup>1</sup>  | 32.19(1)  |
| O5–Mo1–Na1                | 93.31(2)  | O6–Na2–Mo1 <sup>1</sup>                | 66.89(1)  |
| O5–Mo1–Na2                | 48.48(2)  | O6 <sup>1</sup> –Na2–Mo2               | 102.95(2) |
| O5–Mo1–O4                 | 97.2(2)   | O6–Na2–Mo2                             | 31.69(1)  |
| O5–Mo1–N1                 | 166.3(3)  | O8–Na2–Mo1                             | 92.33(1)  |
| O5–Mo1–N5                 | 88.0(3)   | O8 <sup>1</sup> –Na2–Mo1 <sup>1</sup>  | 92.33(1)  |
| N1–Mo1–Mo1 <sup>1</sup>   | 136.22(2) | O8–Na2–Mo1 <sup>1</sup>                | 131.79(2) |
| N1–Mo1–Na1                | 79.92(2)  | O8 <sup>1</sup> –Na2–Mo1               | 131.79(2) |
| N1–Mo1–Na2                | 118.5(2)  | O8 <sup>1</sup> –Na2–Mo2               | 130.23(2) |
| O1–Mo1–Mo1 <sup>1</sup>   | 107.2(2)  | O8–Na2–Mo2                             | 33.23(1)  |
| O1–Mo1–Na1                | 150.7(2)  | O5–Na2–Mo1 <sup>1</sup>                | 33.35(1)  |
| O1–Mo1–Na2                | 149.8(2)  | O5–Na2–Mo1                             | 33.35(1)  |
| O1–Mo1–O6                 | 156.3(3)  | O5–Na2–Mo2                             | 92.32(1)  |
| O1–Mo1–O4                 | 104.8(3)  | O2W <sup>1</sup> –Na2–Mo1              | 125.0(4)  |
| O1–Mo1–O5                 | 105.1(3)  | O2W <sup>1</sup> –Na2–Mo1 <sup>1</sup> | 99.8(4)   |
| O1–Mo1–N1                 | 86.0(3)   | O2W–Na2–Mo1                            | 99.7(4)   |
| O1–Mo1–N5                 | 87.0(3)   | O2W–Na2–Mo1 <sup>1</sup>               | 125.0(4)  |
| N5–Mo1–Mo1 <sup>1</sup>   | 136.4(2)  | O2W–Na2–Mo2                            | 86.1(2)   |
| N5–Mo1–Na1                | 116.7(2)  | O2W <sup>1</sup> –Na2–Mo2              | 152.8(3)  |
| N5–Mo1–Na2                | 78.72(2)  | Mo3–O9–Mo3 <sup>1</sup>                | 132.1(3)  |
| N5–Mo1–N1                 | 84.5(3)   | Mo3–O9–Na1                             | 106.27(2) |
| Mo3–Mo2–Na1               | 68.23(6)  | Mo3 <sup>1</sup> –O9–Na1               | 106.27(2) |
| Mo3–Mo2–Na2               | 69.16(7)  | Mo3–O9–Na2                             | 107.55(2) |
| Na1–Mo2–Na2               | 57.31(8)  | Mo3 <sup>1</sup> –O9–Na2               | 107.55(2) |
| O6–Mo2–Mo3                | 96.36(1)  | Mo1–O6–Mo2                             | 133.1(2)  |
| O6–Mo2–Na1                | 41.17(1)  | Mo1–O6–Na1                             | 106.5(2)  |
| O6–Mo2–Na2                | 41.02(1)  | Mo1–O6–Na2                             | 105.9(2)  |
| O6–Mo2–O7                 | 90.23(2)  | Mo2–O6–Na1                             | 106.6(2)  |
| O6–Mo2–O8                 | 91.38(2)  | Mo2–O6–Na2                             | 107.30(2) |
| O6–Mo2–N2                 | 76.0(2)   | Mo3–O7–Mo2                             | 81.76(2)  |
| O6–Mo2–N4                 | 75.8(3)   | Mo3–O7–Na1                             | 97.00(2)  |

|            |           |                          |           |
|------------|-----------|--------------------------|-----------|
| O7–Mo2–Mo3 | 48.77(1)  | Mo2–O7–Na1               | 96.82(2)  |
| O7–Mo2–Na1 | 49.10(1)  | Mo1–O4–Mo1 <sup>1</sup>  | 82.0(3)   |
| O7–Mo2–Na2 | 94.21(1)  | Mo1–O4–Na1               | 96.7(2)   |
| O7–Mo2–N2  | 88.1(2)   | Mo1 <sup>1</sup> –O4–Na1 | 96.8(2)   |
| O7–Mo2–N4  | 165.0(3)  | Mo3–O8–Mo2               | 82.73(2)  |
| O8–Mo2–Mo3 | 48.40(2)  | Mo3–O8–Na2               | 97.47(2)  |
| O8–Mo2–Na1 | 93.88(1)  | Mo2–O8–Na2               | 96.40(2)  |
| O8–Mo2–Na2 | 50.37(2)  | Mo1 <sup>1</sup> –O5–Mo1 | 82.5(3)   |
| O8–Mo2–O7  | 96.76(2)  | Mo1–O5–Na2               | 98.2(2)   |
| O8–Mo2–N2  | 166.5(3)  | Mo1 <sup>1</sup> –O5–Na2 | 98.2(2)   |
| O8–Mo2–N4  | 89.2(2)   | N9 <sup>1</sup> –N9–Mo3  | 119.99(1) |
| N2–Mo2–Mo3 | 136.53(2) | C7–N9–Mo3                | 131.3(5)  |
| N2–Mo2–Na1 | 79.76(2)  | N10–N9–Mo3               | 131.3(5)  |
| N2–Mo2–Na2 | 116.9(2)  | N1–N2–Mo2                | 120.8(6)  |
| N2–Mo2–N4  | 83.3(3)   | N3–N2–Mo2                | 129.4(7)  |
| O2–Mo2–Mo3 | 106.0(2)  | N71–N7–Mo3               | 120.05(2) |
| O2–Mo2–Na1 | 149.8(2)  | C5–N7–Mo3                | 132.6(6)  |
| O2–Mo2–Na2 | 150.6(2)  | N8–N7–Mo3                | 132.6(6)  |
| O2–Mo2–O6  | 157.6(2)  | N2–N1–Mo1                | 119.2(6)  |
| O2–Mo2–O7  | 103.9(3)  | C2–N1–Mo1                | 132.7(7)  |
| O2–Mo2–O8  | 103.8(2)  | N4–N5–Mo1                | 122.0(6)  |
| O2–Mo2–N2  | 87.1(3)   | N6–N5–Mo1                | 132.9(8)  |
| O2–Mo2–N4  | 87.9(3)   | N5–N4–Mo2                | 118.6(6)  |
| N4–Mo2–Mo3 | 137.11(2) | C4–N4–Mo2                | 128.8(8)  |

Symmetry codes: <sup>1</sup> + x, 1 – y, + z.

**Table S8.** Selected bond distances ( Å ) and angles ( ° ) in  $\text{Na}_2[\text{Mo}_6\text{O}_6(\mu_2\text{-O})_9(\text{Htrz})_4(\text{trz})_2] \cdot 49\text{H}_2\text{O}$  (**4**).

| <b>4</b>    |           |             |           |
|-------------|-----------|-------------|-----------|
| Mo1–Mo6     | 2.6115(1) | Mo5–Mo4     | 2.6129(1) |
| Mo1–Na1     | 3.516(4)  | Mo5–Na1     | 3.543(4)  |
| Mo1–Na2     | 3.515(4)  | Mo5–Na2     | 3.563(4)  |
| Mo1–O7      | 1.949(5)  | Mo5–O13     | 1.957(5)  |
| Mo1–O15     | 2.079(7)  | Mo5–O11     | 2.101(8)  |
| Mo1–O14     | 2.063(7)  | Mo5–N14     | 2.240(8)  |
| Mo1–N1      | 2.259(8)  | Mo5–O12     | 2.030(7)  |
| Mo1–N5      | 2.231(8)  | Mo5–O5      | 1.732(7)  |
| Mo1–O1      | 1.727(6)  | Mo5–N16     | 2.250(9)  |
| Mo6–Na1     | 3.539(4)  | Mo4–Na1     | 3.531(4)  |
| Mo6–Na2     | 3.511(4)  | Mo4–Na2     | 3.592(4)  |
| Mo6–O15     | 2.074(7)  | Mo4–O10     | 1.978(6)  |
| Mo6–O14     | 2.051(6)  | Mo4–O11     | 2.054(7)  |
| Mo6–O13     | 1.966(5)  | Mo4–O12     | 2.056(8)  |
| Mo6–O6      | 1.714(6)  | Mo4–N7      | 2.252(9)  |
| Mo6–N13     | 2.234(8)  | Mo4–O4      | 1.721(6)  |
| Mo6–N17     | 2.234(9)  | Mo4–N11     | 2.265(9)  |
| Mo2–Mo3     | 2.6191(1) | Mo3–Na1     | 3.516(4)  |
| Mo2–Na1     | 3.521(4)  | Mo3–Na2     | 3.583(4)  |
| Mo2–Na2     | 3.570(4)  | Mo3–O10     | 1.954(6)  |
| Mo2–O7      | 1.976(6)  | Mo3–O8      | 2.019(8)  |
| Mo2–O8      | 2.040(8)  | Mo3–O9      | 2.103(8)  |
| Mo2–O9      | 2.096(7)  | Mo3–O3      | 1.731(6)  |
| Mo2–N2      | 2.241(9)  | Mo3–N10     | 2.242(9)  |
| Mo2–N4      | 2.246(8)  | Mo3–N8      | 2.224(9)  |
| Mo2–O2      | 1.704(6)  |             |           |
| Mo6–Mo1–Na1 | 68.75(7)  | O4–Mo4–Na2  | 150.4(3)  |
| Mo6–Mo1–Na2 | 68.10(7)  | O4–Mo4–O10  | 157.6(3)  |
| Na2–Mo1–Na1 | 57.10(9)  | O4–Mo4–O11  | 103.2(3)  |
| O7–Mo1–Mo6  | 96.50(2)  | O4–Mo4–O12  | 102.4(3)  |
| O7–Mo1–Na1  | 41.91(2)  | O4–Mo4–N7   | 87.0(3)   |
| O7–Mo1–Na2  | 40.76(2)  | O4–Mo4–N11  | 85.4(3)   |
| O7–Mo1–O15  | 92.6(2)   | N11–Mo4–Mo5 | 136.4(2)  |
| O7–Mo1–O14  | 90.0(2)   | N11–Mo4–Na1 | 118.7(2)  |
| O7–Mo1–N1   | 77.4(3)   | N11–Mo4–Na2 | 81.3(2)   |
| O7–Mo1–N5   | 75.9(3)   | Mo2–Mo3–Na1 | 68.27(7)  |
| O15–Mo1–Mo6 | 50.96(2)  | Mo2–Mo3–Na2 | 68.24(7)  |
| O15–Mo1–Na1 | 50.75(2)  | Na1–Mo3–Na2 | 56.50(9)  |
| O15–Mo1–Na2 | 95.87(2)  | O10–Mo3–Mo2 | 96.13(2)  |
| O15–Mo1–N1  | 84.8(3)   | O10–Mo3–Na1 | 41.31(2)  |
| O15–Mo1–N5  | 165.7(3)  | O10–Mo3–Na2 | 40.63(2)  |
| O14–Mo1–Mo6 | 50.39(2)  | O10–Mo3–O8  | 90.9(2)   |
| O14–Mo1–Na1 | 95.18(2)  | O10–Mo3–O9  | 91.0(2)   |
| O14–Mo1–Na2 | 49.42(2)  | O10–Mo3–N10 | 77.3(3)   |
| O14–Mo1–O15 | 101.1(2)  | O10–Mo3–N8  | 76.6(3)   |

|             |           |             |           |
|-------------|-----------|-------------|-----------|
| O14–Mo1–N1  | 166.4(3)  | O8–Mo3–Mo2  | 50.2(2)   |
| O14–Mo1–N5  | 87.6(3)   | O8–Mo3–Na1  | 49.64(2)  |
| N1–Mo1–Mo6  | 135.3(2)  | O8–Mo3–Na2  | 94.4(2)   |
| N1–Mo1–Na1  | 78.9(2)   | O8–Mo3–O9   | 101.2(3)  |
| N1–Mo1–Na2  | 118.1(2)  | O8–Mo3–N10  | 165.9(3)  |
| N5–Mo1–Mo6  | 137.70(2) | O8–Mo3–N8   | 86.8(3)   |
| N5–Mo1–Na1  | 117.7(2)  | O9–Mo3–Mo2  | 51.29(2)  |
| N5–Mo1–Na2  | 81.1(2)   | O9–Mo3–Na1  | 95.94(2)  |
| N5–Mo1–N1   | 84.4(3)   | O9–Mo3–Na2  | 50.63(2)  |
| O1–Mo1–Mo6  | 106.6(3)  | O9–Mo3–N10  | 86.8(3)   |
| O1–Mo1–Na1  | 150.9(3)  | O9–Mo3–N8   | 165.5(3)  |
| O1–Mo1–Na2  | 149.9(3)  | O3–Mo3–Mo2  | 105.9(2)  |
| O1–Mo1–O7   | 156.9(3)  | O3–Mo3–Na1  | 150.7(3)  |
| O1–Mo1–O15  | 103.0(3)  | O3–Mo3–Na2  | 150.2(3)  |
| O1–Mo1–O14  | 103.4(3)  | O3–Mo3–O10  | 157.9(3)  |
| O1–Mo1–N1   | 87.1(3)   | O3–Mo3–O8   | 103.7(3)  |
| O1–Mo1–N5   | 85.7(3)   | O3–Mo3–O9   | 102.1(3)  |
| Mo1–Mo6–Na1 | 67.81(7)  | O3–Mo3–N10  | 85.7(4)   |
| Mo1–Mo6–Na2 | 68.26(7)  | O3–Mo3–N8   | 87.5(3)   |
| Na2–Mo6–Na1 | 56.93(9)  | N10–Mo3–Mo2 | 137.8(2)  |
| O15–Mo6–Mo1 | 51.13(2)  | N10–Mo3–Na1 | 118.5(3)  |
| O15–Mo6–Na1 | 50.23(2)  | N10–Mo3–Na2 | 81.6(2)   |
| O15–Mo6–Na2 | 96.07(2)  | N8–Mo3–Mo2  | 136.6(2)  |
| O15–Mo6–N13 | 84.7(3)   | N8–Mo3–Na1  | 79.9(2)   |
| O15–Mo6–N17 | 164.8(3)  | N8–Mo3–Na2  | 117.2(2)  |
| O14–Mo6–Mo1 | 50.79(2)  | N8–Mo3–N10  | 83.1(3)   |
| O14–Mo6–Na1 | 94.72(2)  | Mo1–Na1–Mo2 | 61.41(7)  |
| O14–Mo6–Na2 | 49.47(2)  | Mo1–Na1–Mo4 | 123.35(1) |
| O14–Mo6–O15 | 101.6(3)  | Mo2–Na1–Mo4 | 100.15(9) |
| O14–Mo6–N13 | 166.2(3)  | Mo3–Na1–Mo1 | 100.06(1) |
| O14–Mo6–N17 | 87.0(3)   | Mo3–Na1–Mo2 | 43.70(5)  |
| O13–Mo6–Mo1 | 96.64(2)  | Mo3–Na1–Mo4 | 61.25(6)  |
| O13–Mo6–Na1 | 41.54(2)  | Na2–Na1–Mo1 | 61.42(1)  |
| O13–Mo6–Na2 | 41.81(2)  | Na2–Na1–Mo2 | 62.44(1)  |
| O13–Mo6–O15 | 91.5(2)   | Na2–Na1–Mo4 | 62.78(9)  |
| O13–Mo6–O14 | 91.1(2)   | Na2–Na1–Mo3 | 62.77(9)  |
| O13–Mo6–N13 | 76.3(3)   | O10–Na1–Mo1 | 104.70(2) |
| O13–Mo6–N17 | 75.7(3)   | O10–Na1–Mo2 | 67.63(2)  |
| O6–Mo6–Mo1  | 106.3(2)  | O10–Na1–Mo4 | 32.52(1)  |
| O6–Mo6–Na1  | 150.6(2)  | O10–Na1–Mo3 | 32.21(2)  |
| O6–Mo6–Na2  | 150.0(2)  | O7–Na1–Mo1  | 32.22(1)  |
| O6–Mo6–O15  | 102.7(3)  | O7–Na1–Mo2  | 32.78(1)  |
| O6–Mo6–O14  | 103.3(3)  | O7–Na1–Mo4  | 104.76(2) |
| O6–Mo6–O13  | 157.0(3)  | O7–Na1–Mo3  | 67.85(2)  |
| O6–Mo6–N13  | 87.1(3)   | O15–Na1–Mo1 | 36.19(2)  |
| O6–Mo6–N17  | 87.2(3)   | O15–Na1–Mo2 | 94.66(2)  |
| N13–Mo6–Mo1 | 135.35(2) | O15–Na1–Mo4 | 135.1(2)  |
| N13–Mo6–Na1 | 79.7(2)   | O15–Na1–Mo3 | 136.10(2) |
| N13–Mo6–Na2 | 118.1(2)  | O13–Na1–Mo1 | 67.89(2)  |
| N13–Mo6–N17 | 84.4(3)   | O13–Na1–Mo2 | 105.51(2) |



|             |           |             |           |
|-------------|-----------|-------------|-----------|
| N17–Mo6–Mo1 | 137.3(2)  | O13–Na1–Mo4 | 67.39(2)  |
| N17–Mo6–Na1 | 117.2(2)  | O13–Na1–Mo3 | 105.05(2) |
| N17–Mo6–Na2 | 79.9(2)   | O8–Na1–Mo1  | 94.15(2)  |
| Mo3–Mo2–Na1 | 68.03(6)  | O8–Na1–Mo2  | 35.23(2)  |
| Mo3–Mo2–Na2 | 68.80(7)  | O8–Na1–Mo4  | 93.32(2)  |
| Na1–Mo2–Na2 | 56.57(9)  | O8–Na1–Mo3  | 34.86(2)  |
| O7–Mo2–Mo3  | 96.01(2)  | O11–Na1–Mo1 | 135.9(2)  |
| O7–Mo2–Na1  | 41.99(2)  | O11–Na1–Mo2 | 135.33(2) |
| O7–Mo2–Na2  | 39.58(2)  | O11–Na1–Mo4 | 35.47(2)  |
| O7–Mo2–O8   | 91.5(2)   | O11–Na1–Mo3 | 93.54(2)  |
| O7–Mo2–O9   | 90.3(2)   | O1W–Na1–Mo1 | 117.8(3)  |
| O7–Mo2–N2   | 76.6(3)   | O1W–Na1–Mo2 | 114.9(4)  |
| O7–Mo2–N4   | 75.4(3)   | O1W–Na1–Mo4 | 118.4(4)  |
| O8–Mo2–Mo3  | 49.5(2)   | O1W–Na1–Mo3 | 115.4(4)  |
| O8–Mo2–Na1  | 49.56(2)  | Mo1–Na2–Mo5 | 99.48(9)  |
| O8–Mo2–Na2  | 94.4(2)   | Mo6–Na2–Mo1 | 43.64(5)  |
| O8–Mo2–O9   | 100.7(3)  | Mo6–Na2–Mo5 | 61.22(7)  |
| O8–Mo2–N2   | 85.7(3)   | Na1–Na2–Mo1 | 61.47(9)  |
| O8–Mo2–N4   | 164.9(3)  | Na1–Na2–Mo6 | 61.96(9)  |
| O9–Mo2–Mo3  | 51.5(2)   | Na1–Na2–Mo5 | 61.48(1)  |
| O9–Mo2–Na1  | 95.90(2)  | O10–Na2–Mo1 | 103.94(2) |
| O9–Mo2–Na2  | 50.92(2)  | O10–Na2–Mo6 | 104.42(2) |
| O9–Mo2–N2   | 165.7(3)  | O10–Na2–Mo5 | 66.85(2)  |
| O9–Mo2–N4   | 87.1(3)   | O7–Na2–Mo1  | 31.98(1)  |
| N2–Mo2–Mo3  | 134.7(2)  | O7–Na2–Mo6  | 67.96(2)  |
| N2–Mo2–Na1  | 78.4(2)   | O7–Na2–Mo5  | 104.74(2) |
| N2–Mo2–Na2  | 116.2(2)  | O14–Na2–Mo1 | 35.79(2)  |
| N2–Mo2–N4   | 84.0(3)   | O14–Na2–Mo6 | 35.59(2)  |
| N4–Mo2–Mo3  | 138.11(2) | O14–Na2–Mo5 | 94.20(2)  |
| N4–Mo2–Na1  | 117.2(3)  | O13–Na2–Mo1 | 68.05(2)  |
| N4–Mo2–Na2  | 80.4(2)   | O13–Na2–Mo6 | 32.64(1)  |
| O2–Mo2–Mo3  | 107.7(2)  | O13–Na2–Mo5 | 31.46(1)  |
| O2–Mo2–Na1  | 150.2(3)  | O9–Na2–Mo1  | 93.97(2)  |
| O2–Mo2–Na2  | 151.7(2)  | O9–Na2–Mo6  | 135.3(2)  |
| O2–Mo2–O7   | 156.3(3)  | O9–Na2–Mo5  | 133.7(2)  |
| O2–Mo2–O8   | 104.1(3)  | O12–Na2–Mo1 | 134.06(2) |
| O2–Mo2–O9   | 103.8(3)  | O12–Na2–Mo6 | 93.30(2)  |
| O2–Mo2–N2   | 86.8(3)   | O12–Na2–Mo5 | 34.63(2)  |
| O2–Mo2–N4   | 86.2(3)   | O3W–Na2–Mo1 | 126.5(6)  |
| Mo4–Mo5–Na1 | 68.06(7)  | O3W–Na2–Mo6 | 100.4(6)  |
| Mo4–Mo5–Na2 | 69.17(7)  | O3W–Na2–Mo5 | 85.5(4)   |
| Na1–Mo5–Na2 | 56.44(9)  | O2W–Na2–Mo1 | 100.2(7)  |
| O13–Mo5–Mo4 | 96.46(2)  | O2W–Na2–Mo6 | 126.1(7)  |
| O13–Mo5–Na1 | 41.37(2)  | O2W–Na2–Mo5 | 152.7(5)  |
| O13–Mo5–Na2 | 40.39(2)  | Mo4–O10–Na1 | 106.4(3)  |
| O13–Mo5–O11 | 91.2(2)   | Mo4–O10–Na2 | 107.7(3)  |
| O13–Mo5–N14 | 75.9(3)   | Mo3–O10–Mo4 | 131.8(3)  |
| O13–Mo5–O12 | 91.7(2)   | Mo3–O10–Na1 | 106.5(3)  |
| O13–Mo5–N16 | 75.5(3)   | Mo3–O10–Na2 | 108.2(3)  |
| O11–Mo5–Mo4 | 50.25(2)  | Mo1–O7–Mo2  | 132.6(3)  |

|             |           |             |          |
|-------------|-----------|-------------|----------|
| O11–Mo5–Na1 | 50.00(2)  | Mo1–O7–Na1  | 105.9(3) |
| O11–Mo5–Na2 | 95.4(2)   | Mo1–O7–Na2  | 107.3(3) |
| O11–Mo5–N14 | 86.4(3)   | Mo2–O7–Na1  | 105.2(3) |
| O11–Mo5–N16 | 164.7(3)  | Mo2–O7–Na2  | 108.8(2) |
| N14–Mo5–Mo4 | 136.2(2)  | Mo1–O15–Na1 | 93.1(2)  |
| N14–Mo5–Na1 | 79.7(2)   | Mo6–O15–Mo1 | 77.9(3)  |
| N14–Mo5–Na2 | 116.2(2)  | Mo6–O15–Na1 | 94.0(2)  |
| N14–Mo5–N16 | 83.1(3)   | Mo1–O14–Na2 | 94.8(2)  |
| O12–Mo5–Mo4 | 50.7(2)   | Mo6–O14–Mo1 | 78.8(2)  |
| O12–Mo5–Na1 | 95.5(2)   | Mo6–O14–Na2 | 94.9(2)  |
| O12–Mo5–Na2 | 51.39(2)  | Mo6–O13–Na1 | 106.2(2) |
| O12–Mo5–O11 | 100.7(3)  | Mo6–O13–Na2 | 105.5(3) |
| O12–Mo5–N14 | 165.9(3)  | Mo5–O13–Mo6 | 133.4(3) |
| O12–Mo5–N16 | 87.4(3)   | Mo5–O13–Na1 | 106.7(3) |
| O5–Mo5–Mo4  | 106.3(2)  | Mo5–O13–Na2 | 108.2(2) |
| O5–Mo5–Na1  | 150.8(3)  | Mo2–O8–Na1  | 95.2(3)  |
| O5–Mo5–Na2  | 150.7(2)  | Mo3–O8–Mo2  | 80.4(3)  |
| O5–Mo5–O13  | 157.3(3)  | Mo3–O8–Na1  | 95.5(3)  |
| O5–Mo5–O11  | 103.4(3)  | Mo5–O11–Na1 | 93.7(3)  |
| O5–Mo5–N14  | 87.6(3)   | Mo4–O11–Mo5 | 77.9(3)  |
| O5–Mo5–O12  | 102.4(3)  | Mo4–O11–Na1 | 94.3(3)  |
| O5–Mo5–N16  | 87.2(3)   | N13–N14–Mo5 | 120.6(6) |
| N16–Mo5–Mo4 | 137.52(2) | N15–N14–Mo5 | 128.7(7) |
| N16–Mo5–Na1 | 116.8(2)  | Mo2–O9–Mo3  | 77.2(3)  |
| N16–Mo5–Na2 | 79.5(2)   | Mo2–O9–Na2  | 93.2(2)  |
| Mo5–Mo4–Na1 | 68.59(7)  | Mo3–O9–Na2  | 93.5(3)  |
| Mo5–Mo4–Na2 | 67.99(7)  | Mo5–O12–Mo4 | 79.5(3)  |
| Na1–Mo4–Na2 | 56.30(9)  | Mo5–O12–Na2 | 94.0(2)  |
| O10–Mo4–Mo5 | 96.14(2)  | Mo4–O12–Na2 | 94.4(3)  |
| O10–Mo4–Na1 | 41.12(2)  | N14–N13–Mo6 | 119.6(6) |
| O10–Mo4–Na2 | 40.62(2)  | C10–N13–Mo6 | 133.0(7) |
| O10–Mo4–O11 | 91.2(2)   | N2–N1–Mo1   | 118.6(6) |
| O10–Mo4–O12 | 91.3(2)   | C2–N1–Mo1   | 132.6(9) |
| O10–Mo4–N7  | 77.1(3)   | N8–N7–Mo4   | 118.3(7) |
| O10–Mo4–N11 | 77.6(3)   | C6–N7–Mo4   | 130.7(8) |
| O11–Mo4–Mo5 | 51.9(2)   | N4–N5–Mo1   | 120.1(6) |
| O11–Mo4–Na1 | 50.20(2)  | N6–N5–Mo1   | 129.7(8) |
| O11–Mo4–Na2 | 95.4(2)   | N16–N17–Mo6 | 120.3(7) |
| O11–Mo4–O12 | 101.4(3)  | N18–N17–Mo6 | 132.9(8) |
| O11–Mo4–N7  | 85.1(3)   | N11–N10–Mo3 | 120.5(6) |
| O11–Mo4–N11 | 166.2(3)  | C8–N10–Mo3  | 132.9(9) |
| O12–Mo4–Mo5 | 49.80(2)  | N7–N8–Mo3   | 122.4(7) |
| O12–Mo4–Na1 | 95.36(2)  | N9–N8–Mo3   | 130.1(8) |
| O12–Mo4–Na2 | 50.78(2)  | N1–N2–Mo2   | 121.1(6) |
| O12–Mo4–N7  | 166.8(3)  | N3–N2–Mo2   | 132.7(9) |
| O12–Mo4–N11 | 86.9(3)   | N10–N11–Mo4 | 116.9(6) |
| N7–Mo4–Mo5  | 136.6(2)  | N12–N11–Mo4 | 134.0(9) |
| N7–Mo4–Na1  | 79.9(2)   | N5–N4–Mo2   | 120.0(6) |
| N7–Mo4–Na2  | 117.7(2)  | C4–N4–Mo2   | 129.7(8) |
| N7–Mo4–N11  | 84.6(3)   | N17–N16–Mo5 | 120.4(7) |

---

|            |          |             |          |
|------------|----------|-------------|----------|
| O4–Mo4–Mo5 | 106.2(2) | C12–N16–Mo5 | 129.8(9) |
| O4–Mo4–Na1 | 151.0(3) |             |          |

---

**Table S9.** Comparisons of selected bond distances (Å) for [Mo<sub>6</sub>O<sub>6</sub>(μ<sub>2</sub>-O)<sub>9</sub>(Htrz)<sub>6</sub>] · 1.5H<sub>2</sub>O (**1**), Na[Mo<sub>6</sub>O<sub>6</sub>(μ<sub>2</sub>-O)<sub>9</sub>(Htrz)<sub>5</sub>(trz)] · 1.2H<sub>2</sub>O (**2**), Na<sub>2</sub>[Mo<sub>6</sub>O<sub>6</sub>(μ<sub>2</sub>-O)<sub>9</sub>(Htrz)<sub>4</sub>(trz)<sub>2</sub>] · 10H<sub>2</sub>O (**3**), Na<sub>2</sub>[Mo<sub>6</sub>O<sub>6</sub>(μ<sub>2</sub>-O)<sub>9</sub>(Htrz)<sub>4</sub>(trz)<sub>2</sub>] · 49H<sub>2</sub>O (**4**), Na<sub>3</sub>[Mo<sub>6</sub>O<sub>6</sub>(μ<sub>2</sub>-O)<sub>9</sub>(Htrz)<sub>3</sub>(trz)<sub>3</sub>] · 7.5H<sub>2</sub>O (**5**),<sup>1</sup> [Mo<sub>8</sub>O<sub>8</sub>(μ<sub>2</sub>-O)<sub>12</sub>(Htrz)<sub>8</sub>] · 30H<sub>2</sub>O (**6**),<sup>1</sup> [Mo<sub>8</sub>O<sub>8</sub>(μ<sub>2</sub>-O)<sub>12</sub>(Htrz)<sub>8</sub>] · 62H<sub>2</sub>O (**7**),<sup>2</sup> [MoO<sub>3</sub>(1,2,3-Htrz)<sub>0.5</sub>] (**8**),<sup>3</sup> [Cu<sub>3</sub>(Htrz)<sub>2</sub>Mo<sub>4</sub>O<sub>13</sub>(OH)] · 6H<sub>2</sub>O (**9**),<sup>3</sup> H<sub>2</sub>[Cu<sub>4</sub>(trz)<sub>5</sub>(H<sub>2</sub>O)<sub>2</sub>][Mo<sub>4</sub>Cu<sub>4</sub>O<sub>26</sub>]<sub>0.5</sub> · 3H<sub>2</sub>O (**10**),<sup>4</sup> [Cu<sub>24</sub>(trz)<sub>16</sub>(H<sub>2</sub>O)Cl<sub>4</sub>(HPMo<sub>12</sub>O<sub>40</sub>)] (**11**),<sup>5</sup> Cu(trz) (**12**),<sup>3</sup> [Cu<sub>6</sub>(trz)<sub>3</sub>I<sub>3</sub>]<sub>n</sub> (**13**),<sup>6</sup> (Cu<sub>5</sub>I<sub>5</sub>)[Cu(trz)<sub>2</sub>]<sup>-</sup> (**14**),<sup>7</sup> [Cu(trz)<sub>2</sub>] (**15**),<sup>8</sup> [Cu<sub>3</sub>(trz)<sub>2</sub>V<sub>4</sub>O<sub>12</sub>] (**16**),<sup>9</sup> [Zn<sub>10</sub>(trz)<sub>12</sub>(TADIPA)<sub>2</sub>(DMF)<sub>4</sub>] · DMF · 6H<sub>2</sub>O (**17**),<sup>10</sup> [Zn<sub>10</sub>(trz)<sub>12</sub>(TPTA)<sub>2</sub>(DMA)<sub>2</sub>] · 2DMA · 4H<sub>2</sub>O (**18**),<sup>10</sup> [(Zn<sub>3</sub>OH)<sub>2</sub>(trz)<sub>6</sub> · Zn<sub>6</sub>(OHOBDC)<sub>6</sub>] · 2NH<sub>2</sub>(CH<sub>3</sub>)<sub>2</sub> (**19**),<sup>11</sup> [(Zn<sub>3</sub>OH)<sub>2</sub>(trz)<sub>6</sub> · Zn<sub>6</sub>(OBDC)<sub>6</sub>] · 2NH<sub>2</sub>(CH<sub>3</sub>)<sub>2</sub> (**20**),<sup>11</sup> [Zn<sub>3</sub>(tp)<sub>2</sub>(trz)<sub>2</sub>]<sub>n</sub> (**21**),<sup>12</sup> Zn<sub>5</sub>(trz)<sub>6</sub>(NO<sub>3</sub>)<sub>4</sub> (**22**),<sup>13</sup> Zn<sub>3</sub>(trz)<sub>2</sub>(bdc)<sub>2</sub> · 2DMAc · C<sub>6</sub>H<sub>4</sub>(OH)<sub>2</sub> (**23**),<sup>13</sup> [Ag<sub>29</sub>(trz)<sub>18</sub>][SiW<sub>7</sub>W<sub>5</sub>O<sub>40</sub>](Ag<sub>29</sub>SiW<sub>12</sub>) (**24**),<sup>14</sup> H[Ag<sub>27</sub>(trz)<sub>16</sub>(H<sub>2</sub>O)<sub>4</sub>][AsW<sub>12</sub>O<sub>40</sub>]<sub>2</sub> (**25**),<sup>15</sup> [Ag<sub>15</sub>(trz)<sub>8</sub>][AsW<sub>12</sub>O<sub>40</sub>] (**26**),<sup>15</sup> H<sub>3</sub>[Ag<sub>27</sub>(trz)<sub>16</sub>(H<sub>2</sub>O)<sub>6</sub>][SiW<sub>12</sub>O<sub>40</sub>]<sub>2</sub> · 5H<sub>2</sub>O (**27**),<sup>16</sup> H[Ag<sub>27</sub>(trz)<sub>16</sub>(H<sub>2</sub>O)<sub>4</sub>][PW<sub>12</sub>O<sub>40</sub>]<sub>2</sub> · 2H<sub>2</sub>O (**28**),<sup>16</sup> [Ag<sub>23</sub>(trz)<sub>14</sub>(H<sub>2</sub>O)<sub>2</sub>][HSiW<sub>12</sub>O<sub>40</sub>] (**29**),<sup>16</sup> [Ag<sub>23</sub>(trz)<sub>14</sub>(H<sub>2</sub>O)<sub>2</sub>][PW<sub>12</sub>O<sub>40</sub>] (**30**),<sup>16</sup> [Cd<sub>3</sub>(trz)<sub>3</sub>Cl<sub>3</sub>]<sub>n</sub> (**31**),<sup>6</sup> {[Cd<sub>3</sub>(trz)<sub>6</sub>] · 6H<sub>2</sub>O}<sub>n</sub> (**32**),<sup>6</sup> Cd[HB(trz)<sub>3</sub>]<sub>2</sub> (**33**).<sup>17</sup>

| Complexes | M  | Mo=O (Å)                     | Mo-μ <sub>2</sub> -O <sub>Mo-Mo</sub> (Å) | Mo-μ <sub>2</sub> -O <sub>Mo-trz-Mo</sub> (Å) | M-N (Å)                      |
|-----------|----|------------------------------|-------------------------------------------|-----------------------------------------------|------------------------------|
| <b>1</b>  | Mo | 1.717(6) <sub>av</sub>       | 1.961(6) <sub>av</sub>                    | 2.002(5) <sub>av</sub>                        | 2.225(7) <sub>av</sub>       |
| <b>2</b>  |    | 1.687(6) <sub>av</sub>       | 1.938(6) <sub>av</sub>                    | 2.180(5) <sub>av</sub>                        | 2.197(7) <sub>av</sub>       |
| <b>3</b>  |    | 1.698(5) <sub>av</sub>       | 1.961(5) <sub>av</sub>                    | 1.954(3) <sub>av</sub>                        | 2.225(7) <sub>av</sub>       |
| <b>4</b>  |    | 1.722(6) <sub>av</sub>       | 2.065(7) <sub>av</sub>                    | 1.962(6) <sub>av</sub>                        | 2.244(9) <sub>av</sub>       |
| <b>Av</b> |    | <b>1.706(6)<sub>av</sub></b> | <b>1.981(6)<sub>av</sub></b>              | <b>2.025(5)<sub>av</sub></b>                  | <b>2.223(8)<sub>av</sub></b> |
| <b>5</b>  | Mo | 1.727(5) <sub>av</sub>       | 2.011(1) <sub>av</sub>                    | 1.959(9) <sub>av</sub>                        | 2.241(1) <sub>av</sub>       |
| <b>6</b>  |    | 1.688(4) <sub>av</sub>       | 1.936(4) <sub>av</sub>                    | 2.157(3) <sub>av</sub>                        | 2.198(5) <sub>av</sub>       |
| <b>7</b>  |    | 1.683(7) <sub>av</sub>       | 1.941(4) <sub>av</sub>                    | 2.148(3) <sub>av</sub>                        | 2.198(2) <sub>av</sub>       |
| <b>8</b>  |    | 1.682(5)                     | 1.893(4) <sub>av</sub>                    | 1.875(2)                                      | 2.433(5)                     |
| <b>9</b>  |    | 1.730(3) <sub>av</sub>       | 1.947(3) <sub>av</sub>                    |                                               |                              |
| <b>10</b> |    | 1.670(4) <sub>av</sub>       | 1.888(9) <sub>av</sub>                    |                                               |                              |
| <b>11</b> |    | 1.662(7) <sub>av</sub>       | 1.908(9) <sub>av</sub>                    |                                               |                              |
| <b>Av</b> |    | <b>1.692(5)<sub>av</sub></b> | <b>1.932(5)<sub>av</sub></b>              | <b>2.035(4)<sub>av</sub></b>                  | <b>2.268(3)<sub>av</sub></b> |
| <b>9</b>  | Cu |                              |                                           |                                               | 1.952(4) <sub>av</sub>       |
| <b>10</b> |    |                              |                                           |                                               | 2.049(1) <sub>av</sub>       |
| <b>11</b> |    |                              |                                           |                                               | 1.881(9) <sub>av</sub>       |
| <b>12</b> |    |                              |                                           |                                               | 1.974(2) <sub>av</sub>       |
| <b>13</b> |    |                              |                                           |                                               | 1.929(1) <sub>av</sub>       |
| <b>14</b> |    |                              |                                           |                                               | 1.97(1) <sub>av</sub>        |
| <b>15</b> |    |                              |                                           |                                               | 2.181(5) <sub>av</sub>       |
| <b>16</b> |    |                              |                                           |                                               | 1.963(4) <sub>av</sub>       |
| <b>Av</b> |    |                              |                                           |                                               | <b>1.987(3)<sub>av</sub></b> |
| <b>17</b> | Zn |                              |                                           |                                               | 2.101(4) <sub>av</sub>       |
| <b>18</b> |    |                              |                                           |                                               | 2.092(3) <sub>av</sub>       |
| <b>19</b> |    |                              |                                           |                                               | 2.080(8) <sub>av</sub>       |
| <b>20</b> |    |                              |                                           |                                               | 2.095(2) <sub>av</sub>       |
| <b>21</b> |    |                              |                                           |                                               | 2.050(3) <sub>av</sub>       |
| <b>22</b> |    |                              |                                           |                                               | 2.132(3) <sub>av</sub>       |
| <b>23</b> |    |                              |                                           |                                               | 2.065(4) <sub>av</sub>       |

|           |    |                              |
|-----------|----|------------------------------|
| <b>Av</b> |    | <b>2.088(4)<sub>av</sub></b> |
| <b>24</b> | Ag | 2.146(4) <sub>av</sub>       |
| <b>25</b> |    | 2.115(3) <sub>av</sub>       |
| <b>26</b> |    | 2.13(3) <sub>av</sub>        |
| <b>27</b> |    | 2.114(2) <sub>av</sub>       |
| <b>28</b> |    | 2.126(2) <sub>av</sub>       |
| <b>29</b> |    | 2.138(2) <sub>av</sub>       |
| <b>30</b> |    | 2.145(2) <sub>av</sub>       |
| <b>Av</b> |    | <b>2.131(3)<sub>av</sub></b> |
| <b>31</b> | Cd | 2.311(5) <sub>av</sub>       |
| <b>32</b> |    | 2.351(6) <sub>av</sub>       |
| <b>33</b> |    | 2.349(1) <sub>av</sub>       |
| <b>Av</b> |    | <b>2.373(4)<sub>av</sub></b> |

Av represents average. List of abbreviations: H<sub>4</sub>TADIPA = 5,5'-(1H-1,2,4-triazole-3,5-diyl)diisophthalic acid, DMF = *N,N*-dimethylformamide, H<sub>4</sub>TPTA = [1,1':3',1''-terphenyl]-3,3'',5,5''-tetracarboxylic acid, DMA = *N,N*-dimethylacetamide; H<sub>4</sub>DOBDC = 2,5-dihydroxyterephthalic acid, H<sub>3</sub>OBDC = 2-hydroxyterephthalic acid; tp = terephthalate; H<sub>2</sub>bdc = terephthalic acid, DMAc = *N,N*-dimethylacetamide.

**Table S10.** Detail calibrated adsorption data of O<sub>2</sub>, N<sub>2</sub>, H<sub>2</sub>, CO<sub>2</sub> and CH<sub>4</sub> for Na[Mo<sub>6</sub>O<sub>6</sub>(μ<sub>2</sub>-O)<sub>9</sub>(Htrz)<sub>5</sub>(trz)] · 12H<sub>2</sub>O (**2**) at 298 K.

| Gases            |                | O <sub>2</sub>    |                | CO <sub>2</sub>   |                | CH <sub>4</sub>   |                | N <sub>2</sub>    |                | H <sub>2</sub>    |  |
|------------------|----------------|-------------------|----------------|-------------------|----------------|-------------------|----------------|-------------------|----------------|-------------------|--|
| Temperature (°C) | Pressure (bar) | Adsorption (mg/g) |  |
| 25.0             | 0              | 0                 | 0              | 0                 | 0              | 0                 | 0              | 0                 | 0              | 0                 |  |
|                  | 0.901          | 1.20146           | 0.895          | 2.91417           | 0.900          | 0.65962           | 0.900          | 0.80859           | 0.900          | 1.06600           |  |
|                  | 1.910          | 1.59459           | 1.900          | 3.84683           | 1.910          | 0.75338           | 1.900          | 0.83135           | 1.910          | 1.24147           |  |
|                  | 3.900          | 2.22086           | 3.900          | 5.12808           | 3.900          | 0.81318           | 3.900          | 0.86466           | 3.910          | 1.13953           |  |
|                  | 5.900          | 2.91233           | 5.898          | 6.01419           | 5.899          | 0.80167           | 5.895          | 0.85572           | 5.910          | 1.12377           |  |
|                  | 7.897          | 3.72497           | 7.891          | 7.08482           | 7.899          | 0.86542           | 7.900          | 0.91075           | 7.900          | 1.29036           |  |
|                  | 9.890          | 4.36027           | 9.894          | 7.84100           | 9.895          | 0.93096           | 9.899          | 0.98113           | 9.901          | 1.41196           |  |
|                  | 11.893         | 5.04451           | 11.896         | 8.79690           | 11.899         | 0.96234           | 11.896         | 0.99932           | 11.900         | 1.31786           |  |
|                  | 13.900         | 5.81597           | 13.895         | 9.45548           | 13.893         | 0.93762           | 13.893         | 1.01587           | 13.901         | 1.07930           |  |
|                  | 15.894         | 6.39814           | 15.894         | 10.54885          | 15.895         | 0.96558           | 15.898         | 0.99552           | 15.907         | 1.19075           |  |
|                  | 17.900         | 7.05991           | 17.894         | 10.94648          | 17.897         | 0.96485           | 17.897         | 1.01067           | 17.903         | 1.35016           |  |
|                  | 19.896         | 7.66172           | 19.896         | 12.38102          | 19.897         | 0.88081           | 19.899         | 1.08557           | 19.905         | 1.35929           |  |
|                  | 21.899         | 8.32109           | 21.892         | 12.44916          | 21.895         | 1.04187           | 21.892         | 1.02015           | 21.900         | 1.06392           |  |
|                  | 23.897         | 8.99572           | 23.894         | 12.84092          | 23.895         | 1.04187           | 23.895         | 1.05164           | 23.903         | 1.25002           |  |
|                  | 25.894         | 9.63720           | 25.893         | 14.63140          | 25.897         | 1.01403           | 25.892         | 1.01958           | 25.904         | 1.09822           |  |
|                  | 27.896         | 10.23207          | 27.892         | 14.63140          | 27.897         | 0.89531           | 27.893         | 1.01958           | 27.902         | 1.00704           |  |
|                  | 29.897         | 10.93957          | 29.891         | 15.25720          | 29.896         | 0.98330           | 29.893         | 0.95286           | 29.905         | 1.40765           |  |

**Table S11.** Detail calibrated adsorption data of O<sub>2</sub>, N<sub>2</sub>, H<sub>2</sub>, CO<sub>2</sub> and CH<sub>4</sub> for Na<sub>2</sub>[Mo<sub>6</sub>O<sub>6</sub>(μ<sub>2</sub>-O)<sub>9</sub>(Htrz)<sub>4</sub>(trz)<sub>2</sub>] · 10H<sub>2</sub>O (**3**) at 298 K.

| Gases            |                | O <sub>2</sub>    |                | CO <sub>2</sub>   |                | CH <sub>4</sub>   |                | N <sub>2</sub>    |                | H <sub>2</sub>    |  |
|------------------|----------------|-------------------|----------------|-------------------|----------------|-------------------|----------------|-------------------|----------------|-------------------|--|
| Temperature (°C) | Pressure (bar) | Adsorption (mg/g) |  |
| 25.0             | 0              | 0                 | 0              | 0                 | 0              | 0                 | 0              | 0                 | 0              | 0                 |  |
|                  | 0.900          | 1.05713           | 0.895          | 2.76303           | 0.900          | 0.18761           | 0.898          | 0.23097           | 0.900          | 0.07238           |  |
|                  | 1.900          | 1.55384           | 1.900          | 3.98258           | 1.910          | 0.34022           | 1.900          | 0.26136           | 1.900          | 0.08325           |  |
|                  | 3.900          | 2.30408           | 3.900          | 5.09627           | 3.900          | 0.40163           | 3.890          | 0.38401           | 3.910          | 0.09704           |  |
|                  | 5.890          | 2.94222           | 5.899          | 5.82859           | 5.900          | 0.52627           | 5.890          | 0.42085           | 5.910          | 0.08770           |  |
|                  | 7.899          | 3.78207           | 7.895          | 6.35108           | 7.896          | 0.58646           | 7.899          | 0.51454           | 7.900          | 0.18790           |  |
|                  | 9.897          | 4.60447           | 9.897          | 6.97763           | 9.899          | 0.67683           | 9.890          | 0.53204           | 9.901          | 0.16635           |  |
|                  | 11.900         | 5.43190           | 11.895         | 7.48048           | 11.900         | 0.69210           | 11.896         | 0.68936           | 11.905         | 0.14362           |  |
|                  | 13.895         | 6.00660           | 13.894         | 7.83025           | 13.895         | 0.73648           | 13.899         | 0.74183           | 13.912         | 0.11968           |  |
|                  | 15.896         | 6.67295           | 15.899         | 8.22129           | 15.894         | 0.72099           | 15.894         | 0.73707           | 15.900         | 0.14846           |  |
|                  | 17.900         | 7.38667           | 17.894         | 8.51607           | 17.894         | 0.75000           | 17.894         | 0.71126           | 17.903         | 0.16561           |  |
|                  | 19.894         | 8.01280           | 19.892         | 8.83445           | 19.899         | 0.81263           | 19.896         | 0.73580           | 19.906         | 0.21733           |  |
|                  | 21.894         | 8.71157           | 21.897         | 9.13997           | 21.897         | 0.80729           | 21.899         | 0.71102           | 21.905         | 0.19979           |  |
|                  | 23.894         | 9.34683           | 23.896         | 9.13997           | 23.898         | 0.76026           | 23.897         | 0.60355           | 23.904         | 0.13476           |  |
|                  | 25.893         | 10.07824          | 25.894         | 9.26432           | 25.897         | 0.84049           | 25.896         | 0.59378           | 25.901         | 0.19134           |  |
|                  | 27.898         | 10.78664          | 27.894         | 9.64255           | 27.894         | 0.76926           | 27.895         | 0.55800           | 27.904         | 0.16042           |  |
| 29.896           | 11.43590       | 29.892            | 9.75213        | 29.898            | 0.72027        | 29.897            | 0.54853        | 29.900            | 0.16555        |                   |  |

**Table S12.** Detail calibrated adsorption data of O<sub>2</sub>, N<sub>2</sub>, H<sub>2</sub>, CO<sub>2</sub> and CH<sub>4</sub> for Na<sub>2</sub>[Mo<sub>6</sub>O<sub>6</sub>(μ<sub>2</sub>-O)<sub>9</sub>(Htrz)<sub>4</sub>(trz)<sub>2</sub>] 49H<sub>2</sub>O (**4**) at 298 K.

| Gases            |                | O <sub>2</sub>    |                | CO <sub>2</sub>   |                | CH <sub>4</sub>   |                | N <sub>2</sub>    |                | H <sub>2</sub>    |  |
|------------------|----------------|-------------------|----------------|-------------------|----------------|-------------------|----------------|-------------------|----------------|-------------------|--|
| Temperature (°C) | Pressure (bar) | Adsorption (mg/g) |  |
| 25.0             | 0              | 0                 | 0              | 0                 | 0              | 0                 | 0              | 0                 | 0              | 0                 |  |
|                  | 0.900          | 1.52563           | 0.900          | 3.16372           | 0.897          | 0.51970           | 0.897          | 0.93336           | 0.902          | 0.83219           |  |
|                  | 1.900          | 1.96613           | 1.900          | 4.38676           | 1.900          | 0.72855           | 1.900          | 1.08367           | 1.900          | 0.89006           |  |
|                  | 3.900          | 2.79526           | 3.900          | 5.79246           | 3.900          | 0.90517           | 3.890          | 1.04798           | 3.900          | 1.18211           |  |
|                  | 5.899          | 3.85279           | 5.900          | 7.21671           | 5.892          | 1.05807           | 5.900          | 0.96659           | 5.890          | 1.32227           |  |
|                  | 7.895          | 4.72477           | 7.898          | 8.16657           | 7.891          | 1.20453           | 7.897          | 1.06992           | 7.899          | 1.27938           |  |
|                  | 9.896          | 5.64483           | 9.891          | 8.85294           | 9.894          | 1.35089           | 9.893          | 0.97765           | 9.908          | 1.38368           |  |
|                  | 11.896         | 6.30076           | 11.892         | 9.56203           | 11.899         | 1.50293           | 11.892         | 1.08237           | 11.901         | 1.44399           |  |
|                  | 13.893         | 7.13015           | 13.897         | 10.49088          | 13.897         | 1.73224           | 13.897         | 1.00510           | 13.905         | 1.48594           |  |
|                  | 15.896         | 7.89819           | 15.894         | 11.50677          | 15.895         | 1.75789           | 15.895         | 0.91991           | 15.904         | 1.54684           |  |
|                  | 17.894         | 8.74856           | 17.894         | 11.76114          | 17.896         | 1.91461           | 17.894         | 1.02700           | 17.903         | 1.71844           |  |
|                  | 19.896         | 9.63265           | 19.895         | 12.20985          | 19.894         | 2.04054           | 19.894         | 0.81302           | 19.904         | 1.70628           |  |
|                  | 21.894         | 10.50397          | 21.892         | 12.20985          | 21.892         | 2.37734           | 21.896         | 0.98947           | 21.903         | 1.58512           |  |
|                  | 23.894         | 11.31848          | 23.892         | 13.96626          | 23.895         | 2.43672           | 23.893         | 0.67786           | 23.903         | 1.50193           |  |
|                  | 25.893         | 11.91955          | 25.893         | 14.33316          | 25.895         | 2.73173           | 25.893         | 0.88494           | 25.906         | 1.57642           |  |
|                  | 27.895         | 12.63629          | 27.891         | 14.54317          | 27.895         | 2.99196           | 27.892         | 0.61879           | 27.902         | 1.74072           |  |
| 29.895           | 13.54145       | 29.890            | 15.59483       | 29.895            | 2.99196        | 29.891            | 0.61035        | 29.901            | 1.65163        |                   |  |



**Table S13.** Comparisons of O<sub>2</sub> and CO<sub>2</sub> adsorption data for **2** ~ **4** with some other reported porous materials at 1.0 bar under different temperatures.

| Adsorbent                             | O <sub>2</sub><br>(mmol·g <sup>-1</sup> ) | amount | CO <sub>2</sub><br>(mmol·g <sup>-1</sup> ) | amount | Temperature<br>(K) |
|---------------------------------------|-------------------------------------------|--------|--------------------------------------------|--------|--------------------|
| <b>2</b>                              | 0.0250                                    |        | 0.0482                                     |        | 298                |
| <b>3</b>                              | 0.0253                                    |        | 0.0489                                     |        | 298                |
| <b>4</b>                              | 0.0338                                    |        | 0.0525                                     |        | 298                |
| MOF-177 <sup>21</sup>                 | 0.18                                      |        |                                            |        | 298                |
| Cu(BDT) <sup>22</sup>                 | 14.30                                     |        |                                            |        | 77                 |
| [Zn(dtp)] <sup>23</sup>               | 12.39                                     |        |                                            |        | 77                 |
| [Zn(dtp)] <sup>23</sup>               |                                           |        | 6.10                                       |        | 195                |
| [Mg(TCPBDA)] <sup>24</sup>            |                                           |        | 1.49                                       |        | 298                |
| Fe <sub>2</sub> (DOBDC) <sup>25</sup> |                                           |        | 2.02                                       |        | 298                |
| [Cu(tba) <sub>2</sub> ] <sup>26</sup> |                                           |        | 1.83                                       |        | 293                |
| [CuL] <sup>27</sup>                   |                                           |        | 4.95                                       |        | 298                |

List of abbreviations: H<sub>2</sub>BDT = ditetrazole 1,4-benzeneditetrazol-5-yl; H<sub>2</sub>dtp = 2,3-di-1*H*-tetrazol-5-ylpyrazine; TCPBDA<sup>2-</sup> = *N,N,N',N'*-tetrakis(4-carboxyphenyl)-biphenyl-4'4'-diamine; BOBDC = 2,5-dioxido-1,4-benzenedicarboxylate; tba = 4-(1*H*-1,2,4-triazol-1-yl)benzoate; H<sub>2</sub>L = 5-(1*H*-tetrazol-1-yl)isophthalic acid

**Table S14.** Bond valence calculations for complexes  $[\text{Mo}_6\text{O}_6(\mu_2\text{-O})_9(\text{Htrz})_6] \cdot 15\text{H}_2\text{O}$  (**1**),  $\text{Na}[\text{Mo}_6\text{O}_6(\mu_2\text{-O})_9(\text{Htrz})_5(\text{trz})] \cdot 12\text{H}_2\text{O}$  (**2**),  $\text{Na}_2[\text{Mo}_6\text{O}_6(\mu_2\text{-O})_9(\text{Htrz})_4(\text{trz})_2] \cdot 10\text{H}_2\text{O}$  (**3**) and  $\text{Na}_2[\text{Mo}_6\text{O}_6(\mu_2\text{-O})_9(\text{Htrz})_4(\text{trz})_2] \cdot 49\text{H}_2\text{O}$  (**4**) respectively.

| Complexes                                                                                                                   | Atoms     | N         | $\sum S_{ij}$ | $\Delta$     |
|-----------------------------------------------------------------------------------------------------------------------------|-----------|-----------|---------------|--------------|
| $[\text{Mo}_6\text{O}_6(\mu_2\text{-O})_9(\text{Htrz})_6] \cdot 15\text{H}_2\text{O}$ ( <b>1</b> )                          | Mo1       | 5+        | 5.230         | 0.230        |
|                                                                                                                             | Mo2       | 5+        | 5.386         | 0.386        |
|                                                                                                                             | Mo3       | 5+        | 5.257         | 0.257        |
|                                                                                                                             | Mo4       | 5+        | 5.263         | 0.263        |
|                                                                                                                             | Mo5       | 5+        | 5.218         | 0.218        |
|                                                                                                                             | Mo6       | 5+        | 5.394         | 0.394        |
|                                                                                                                             | <b>Mo</b> | <b>5+</b> | <b>5.291</b>  | <b>0.291</b> |
| $\text{Na}[\text{Mo}_6\text{O}_6(\mu_2\text{-O})_9(\text{Htrz})_5(\text{trz})] \cdot 12\text{H}_2\text{O}$ ( <b>2</b> )     | Mo1       | 5+        | 5.351         | 0.351        |
|                                                                                                                             | Mo2       | 5+        | 5.292         | 0.292        |
|                                                                                                                             | Mo3       | 5+        | 5.363         | 0.363        |
|                                                                                                                             | <b>Mo</b> | <b>5+</b> | <b>5.335</b>  | <b>0.335</b> |
| $\text{Na}_2[\text{Mo}_6\text{O}_6(\mu_2\text{-O})_9(\text{Htrz})_4(\text{trz})_2] \cdot 10\text{H}_2\text{O}$ ( <b>3</b> ) | Mo1       | 5+        | 5.153         | 0.153        |
|                                                                                                                             | Mo2       | 5+        | 5.078         | 0.078        |
|                                                                                                                             | Mo3       | 5+        | 5.351         | 0.351        |
|                                                                                                                             | <b>Mo</b> | <b>5+</b> | <b>5.194</b>  | <b>0.194</b> |
|                                                                                                                             | Mo4       | 5+        | 4.868         | 0.132        |
| $\text{Na}_2[\text{Mo}_6\text{O}_6(\mu_2\text{-O})_9(\text{Htrz})_4(\text{trz})_2] \cdot 49\text{H}_2\text{O}$ ( <b>4</b> ) | Mo2       | 5+        | 4.899         | 0.101        |
|                                                                                                                             | Mo3       | 5+        | 4.891         | 0.109        |
|                                                                                                                             | Mo4       | 5+        | 4.862         | 0.138        |
|                                                                                                                             | Mo5       | 5+        | 4.826         | 0.174        |
|                                                                                                                             | Mo6       | 5+        | 4.926         | 0.074        |
|                                                                                                                             | <b>Mo</b> | <b>5+</b> | <b>4.879</b>  | <b>0.121</b> |

**Table S15.** Selected average bond distances (Å) and NPA charge of different N donor and Mo atoms in the optimized individual conformers of **1-1** ~ **4-1** complexes calculated at the B3LYP/def2SVP/LANL2DZ level of theory.

| Complexes  | Bond Distances (Å)      |                       | NPA Charge          |                        |                      |
|------------|-------------------------|-----------------------|---------------------|------------------------|----------------------|
|            | Mo–N <sub>neutral</sub> | Mo–N <sub>anion</sub> | Q <sub>Mo</sub>     | Q <sub>N-neutral</sub> | Q <sub>N-anion</sub> |
| <b>1-1</b> | 2.435 <sub>av</sub>     |                       | 0.998 <sub>av</sub> | –0.212 <sub>av</sub>   |                      |
| <b>2-1</b> | 2.413 <sub>av</sub>     | 2.264 <sub>av</sub>   | 0.969 <sub>av</sub> | –0.211 <sub>av</sub>   | –0.291 <sub>av</sub> |
| <b>3-1</b> | 2.399 <sub>av</sub>     | 2.235 <sub>av</sub>   | 0.942 <sub>av</sub> | –0.214 <sub>av</sub>   | –0.273 <sub>av</sub> |
| <b>4-1</b> | 2.388 <sub>av</sub>     | 2.250 <sub>av</sub>   | 0.945 <sub>av</sub> | –0.210 <sub>av</sub>   | –0.290 <sub>av</sub> |

**Table S16.** Geometry optimized coordinates for compounds **1** ~ **4** and **1-1** ~ **4-1**, respectively.

| <b>1</b> |             |              |             |
|----------|-------------|--------------|-------------|
| Mo       | 9.797845339 | 7.421998322  | 7.366825012 |
| Mo       | 7.421969778 | 3.544719927  | 11.6001938  |
| Mo       | 10.660716   | 5.652893137  | 5.780763283 |
| Mo       | 6.554768185 | 5.305920419  | 13.18735751 |
| Mo       | 9.647420827 | 5.668480076  | 2.262223269 |
| Mo       | 7.580426812 | 5.276325968  | 16.68808211 |
| Mo       | 6.807966571 | 10.03428864  | 3.772931842 |
| Mo       | 10.41091982 | 0.932783694  | 15.19868734 |
| Mo       | 8.0896978   | 7.500294006  | 1.478845242 |
| Mo       | 9.131108541 | 3.456159765  | 17.5021151  |
| Mo       | 7.498020661 | 9.976586745  | 6.192231533 |
| Mo       | 9.721467495 | 0.992722559  | 12.77942311 |
| O        | 11.33028355 | 7.436634763  | 6.158945085 |
| O        | 5.887145491 | 3.527470886  | 12.80614995 |
| O        | 9.81935423  | 6.144044695  | 4.115997799 |
| O        | 7.391780987 | 4.761486991  | 14.8509716  |
| O        | 10.05262783 | 7.443311342  | 1.574659242 |
| O        | 7.168546107 | 3.517723736  | 17.4024486  |
| O        | 9.051441703 | 5.687487331  | 6.876731083 |
| O        | 8.16708105  | 5.279744726  | 12.09450274 |
| O        | 8.688118639 | 8.475200139  | 6.169586649 |
| O        | 8.530881074 | 2.493278605  | 12.79887774 |
| O        | 7.814098885 | 8.530072617  | 3.083579207 |
| O        | 9.405270552 | 2.438647778  | 15.88787747 |
| O        | 8.33091301  | 10.86290415  | 4.664362535 |
| O        | 8.886859133 | 0.105502389  | 14.30461822 |
| O        | 6.016635432 | 9.105107576  | 5.288343069 |
| O        | 11.20209873 | 1.864098748  | 13.68184061 |
| O        | 7.698093086 | 5.778242491  | 2.27889701  |
| O        | 9.53620561  | 5.191493863  | 16.74878823 |
| O        | 10.50923133 | 7.223289555  | 8.940240068 |
| O        | 6.710357399 | 3.747033943  | 10.02783763 |
| O        | 11.76304403 | 4.596371088  | 6.630945602 |
| O        | 5.456678289 | 6.371606374  | 12.34164396 |
| O        | 9.9646257   | 4.55168486   | 0.95391906  |
| O        | 7.23425445  | 6.423146319  | 17.95770294 |
| O        | 4.071291724 | -0.008681141 | 3.391326475 |
| O        | 13.14764494 | 10.97424384  | 15.57704922 |
| O        | 5.110971823 | -0.142452838 | 7.190884811 |
| O        | 12.10824992 | 11.11285069  | 11.77916789 |
| O        | 12.61418513 | 6.964045041  | 18.73801841 |
| O        | 4.604255387 | 4.000658634  | 0.240291017 |
| N        | 3.968979296 | 8.68812104   | 2.457452775 |
| N        | 13.24134385 | 2.281328516  | 16.46898347 |
| N        | 5.311276308 | 8.686211323  | 2.528138787 |
| N        | 11.89894304 | 2.271648582  | 16.43105372 |

---

|   |             |             |             |
|---|-------------|-------------|-------------|
| N | 7.768659944 | 7.712165433 | 8.531547952 |
| N | 9.451193322 | 3.255070267 | 10.43639998 |
| N | 5.745296846 | 7.876319577 | 1.581194018 |
| N | 11.47704863 | 3.070024752 | 17.39171477 |
| N | 6.878945309 | 8.501606998 | 7.960628095 |
| N | 10.34255817 | 2.470756077 | 11.01247254 |
| N | 9.801100918 | 3.614724817 | 4.818903787 |
| N | 7.421831511 | 7.303227748 | 14.14200571 |
| N | 12.26283364 | 5.381980227 | 4.035601681 |
| N | 4.947787814 | 5.546478622 | 14.92743091 |
| N | 9.427594983 | 3.668728107 | 3.557468498 |
| N | 7.816122277 | 7.246094437 | 15.39595276 |
| N | 11.90794831 | 5.307052431 | 2.764920264 |
| N | 5.305831993 | 5.609762404 | 16.19725648 |
| N | 7.929879051 | 10.76617733 | 1.73496179  |
| N | 9.295918307 | 0.199289066 | 17.23492563 |
| N | 8.326409281 | 9.800990875 | 0.93216933  |
| N | 8.896269394 | 1.161497708 | 18.03990377 |
| N | 10.1897944  | 9.650660562 | 7.872915932 |
| N | 7.030687624 | 1.311189207 | 11.09277384 |
| N | 9.475250664 | 10.65826473 | 7.418939791 |
| N | 7.746480997 | 0.307455832 | 11.55258865 |
| N | 5.726392293 | 8.335275877 | 8.623971734 |
| N | 11.49355612 | 2.63280824  | 10.34551994 |
| N | 2.81493934  | 5.020767703 | 4.103377011 |
| N | 14.40340202 | 5.937487232 | 14.86201847 |
| N | 11.11158876 | 10.14721011 | 8.702493907 |
| N | 6.107834066 | 0.808560154 | 10.26812158 |
| N | 13.7040999  | 10.00626979 | 18.80914495 |
| N | 3.517567592 | 0.952558482 | 0.160619648 |
| N | 8.894249315 | 2.476083941 | 3.254093489 |
| N | 8.37628226  | 8.42797385  | 15.68702016 |
| H | 3.44746708  | 9.231133145 | 3.144950078 |
| H | 13.75072365 | 1.745751466 | 15.76666856 |
| H | 4.904120346 | 8.830274229 | 8.28425181  |
| H | 12.31571789 | 2.136281524 | 10.6836704  |
| H | 3.244154449 | 4.959111027 | 5.026335843 |
| H | 13.97502226 | 6.013789938 | 13.93975213 |
| H | 9.745390784 | 2.129483434 | 6.341648083 |
| H | 7.469116177 | 8.786564843 | 12.61653978 |
| H | 11.66612462 | 9.491688456 | 9.25633412  |
| H | 5.550962054 | 1.457604055 | 9.709095844 |
| H | 13.97894837 | 9.421403582 | 18.01864779 |
| H | 3.239514286 | 1.533935214 | 0.952403856 |
| H | 2.161707676 | 4.76039224  | 0.944397808 |
| H | 15.06587292 | 6.169340006 | 18.0208366  |
| H | 4.814372701 | 6.672390682 | 0.070106661 |
| H | 12.43077607 | 4.277278297 | 18.88415702 |
| H | 7.744235996 | 6.363852122 | 10.20676416 |
| H | 9.471987206 | 4.58813426  | 8.747835302 |

---

|          |             |             |              |
|----------|-------------|-------------|--------------|
| H        | 2.481479964 | 7.729541531 | 1.218213639  |
| H        | 14.74717616 | 3.239237693 | 17.68463761  |
| H        | 8.550909526 | 2.328698572 | 2.306693599  |
| H        | 8.726742242 | 8.573003475 | 16.63200127  |
| H        | 6.266734168 | 1.566339001 | 1.605542838  |
| H        | 10.9598909  | 9.399212133 | 17.35713322  |
| H        | 5.080140741 | 7.142365963 | 10.3220761   |
| H        | 12.13608415 | 3.812153825 | 8.636313634  |
| H        | 4.33385023  | 4.424242431 | 2.685401785  |
| H        | 12.89954785 | 6.558482815 | 16.28540863  |
| H        | 7.856843342 | 1.433113765 | 7.758532383  |
| H        | 9.366962439 | 9.530400229 | 11.2276594   |
| H        | 10.00861697 | 0.722823998 | 9.463215955  |
| H        | 7.212040717 | 10.22588421 | 9.522509794  |
| H        | 8.406722812 | 0.66057577  | 4.321290759  |
| H        | 8.86265514  | 10.24094148 | 14.61584331  |
| H        | 12.35548428 | 0.648265017 | 18.08621529  |
| H        | 4.870715775 | 10.30813642 | 0.877738429  |
| C        | 9.504818443 | 2.384872857 | 5.319722215  |
| C        | 7.727349825 | 8.528482171 | 13.63331094  |
| C        | 2.232988479 | 4.887986066 | 2.019283486  |
| C        | 14.99107304 | 6.048490828 | 16.94559035  |
| C        | 4.685961814 | 7.366624139 | 0.893984945  |
| C        | 12.54690975 | 3.584836557 | 18.05774853  |
| C        | 7.192849175 | 7.050524649 | 9.571750116  |
| C        | 10.02472146 | 3.908188318 | 9.389484321  |
| C        | 3.527966473 | 7.881244042 | 1.455979576  |
| C        | 13.69701211 | 3.082956368 | 17.46798376  |
| C        | 6.569434289 | 0.631298023 | 1.148744104  |
| C        | 10.65682766 | 10.332392   | 17.81701021  |
| C        | 5.865456501 | 7.438067132 | 9.636139897  |
| C        | 11.35228554 | 3.521101976 | 9.326188556  |
| C        | 3.305786357 | 4.706080216 | 2.875453245  |
| C        | 13.92123766 | 6.256546315 | 16.0919891   |
| C        | 8.323227665 | 0.477413982 | 7.963273019  |
| C        | 8.899025301 | 10.48414312 | 11.01725568  |
| C        | 9.381000993 | 0.156893922 | 8.793085575  |
| C        | 7.839814806 | 10.79825054 | 10.18691263  |
| C        | 8.899044617 | 1.636955351 | 4.324278288  |
| C        | 8.362371934 | 9.267711833 | 14.61712319  |
| C        | 7.161789209 | 0.386513374 | -0.075872989 |
| C        | 10.06307813 | 10.57251386 | 19.04178613  |
| <b>2</b> |             |             |              |
| Mo       | 4.603551    | 8.730613    | 9.521628     |
| Mo       | 8.868149    | 8.22178     | 6.246881     |
| Mo       | 7.178457    | 6.889044    | 7.637791     |
| Mo       | 17.129953   | 18.760078   | 9.515879     |
| Mo       | 21.393856   | 18.252623   | 6.240171     |
| Mo       | 19.704819   | 16.920639   | 7.632102     |
| Mo       | 19.587893   | 8.777758    | 1.563153     |

---

|    |           |           |           |
|----|-----------|-----------|-----------|
| Mo | 15.374062 | 8.203693  | 4.934515  |
| Mo | 17.053261 | 6.921876  | 3.483155  |
| Mo | 7.062613  | 18.808699 | 1.560806  |
| Mo | 2.84894   | 18.235708 | 4.932731  |
| Mo | 4.528007  | 16.953369 | 3.481995  |
| Mo | 19.566656 | 11.333688 | 1.562925  |
| Mo | 15.303492 | 11.840156 | 4.838882  |
| Mo | 16.991167 | 13.173311 | 3.446563  |
| Mo | 7.041253  | 1.301982  | 1.558562  |
| Mo | 2.778426  | 1.809998  | 4.836131  |
| Mo | 4.466904  | 3.141756  | 3.442825  |
| Mo | 4.583189  | 11.286815 | 9.52171   |
| Mo | 8.796634  | 11.860325 | 6.149747  |
| Mo | 7.117556  | 13.144371 | 7.60022   |
| Mo | 17.108612 | 1.253547  | 9.515994  |
| Mo | 21.322857 | 1.826758  | 6.143924  |
| Mo | 19.643412 | 3.109049  | 7.594938  |
| O  | 6.114714  | 8.402691  | 8.353825  |
| O  | 8.880286  | 7.680004  | 8.14473   |
| O  | 7.032619  | 7.622772  | 5.823733  |
| O  | 3.25447   | 8.013567  | 10.37399  |
| O  | 10.00231  | 7.162054  | 5.425274  |
| O  | 7.482309  | 5.174979  | 7.51395   |
| O  | 18.640102 | 18.43429  | 8.345338  |
| O  | 21.40535  | 17.714172 | 8.138503  |
| O  | 19.558338 | 17.652637 | 5.817118  |
| O  | 15.781121 | 18.042711 | 10.367909 |
| O  | 22.528416 | 17.193222 | 5.418404  |
| O  | 20.011377 | 15.207055 | 7.512218  |
| O  | 18.080698 | 8.438166  | 2.750222  |
| O  | 15.323681 | 7.670432  | 3.02588   |
| O  | 17.218361 | 7.618197  | 5.31504   |
| O  | 20.940956 | 8.08584   | 0.694288  |
| O  | 14.30457  | 7.078011  | 5.744708  |
| O  | 16.783861 | 5.197881  | 3.579512  |
| O  | 5.555521  | 18.469219 | 2.747953  |
| O  | 2.79909   | 17.702717 | 3.024141  |
| O  | 4.69312   | 17.650152 | 5.313406  |
| O  | 8.414796  | 18.114727 | 0.692318  |
| O  | 1.780219  | 17.108984 | 5.742307  |
| O  | 4.258273  | 15.229321 | 3.57736   |
| O  | 18.055742 | 11.659577 | 2.733037  |
| O  | 15.289987 | 12.380212 | 2.940892  |
| O  | 17.13846  | 12.441418 | 5.261371  |
| O  | 20.915359 | 12.051414 | 0.710757  |
| O  | 14.168077 | 12.897678 | 5.662344  |
| O  | 16.684389 | 14.886798 | 3.56692   |
| O  | 5.531742  | 1.628385  | 2.72913   |
| O  | 2.766367  | 2.347314  | 2.937366  |
| O  | 4.613862  | 2.410706  | 5.258211  |

---

---

|   |           |           |           |
|---|-----------|-----------|-----------|
| O | 8.389285  | 2.020271  | 0.70614   |
| O | 1.643704  | 2.869625  | 5.65765   |
| O | 4.160507  | 4.855709  | 3.561117  |
| O | 6.091701  | 11.628086 | 8.336875  |
| O | 8.847981  | 12.397526 | 8.057454  |
| O | 6.95182   | 12.445483 | 5.770317  |
| O | 3.230073  | 11.979772 | 10.38977  |
| O | 9.865202  | 12.986215 | 5.338603  |
| O | 7.383453  | 14.868895 | 7.500836  |
| O | 18.615532 | 1.593127  | 8.328296  |
| O | 21.372955 | 2.360633  | 8.052273  |
| O | 19.478554 | 2.412625  | 5.763165  |
| O | 15.755853 | 1.945416  | 10.385107 |
| O | 22.392551 | 2.952198  | 5.333405  |
| O | 19.912724 | 4.832993  | 7.499052  |
| O | 8.251411  | 10.042825 | 6.668297  |
| O | 5.468997  | 10.014329 | 10.708215 |
| O | 3.860797  | 10.005385 | 8.207965  |
| O | 20.775291 | 0.009896  | 6.661969  |
| O | 17.994938 | 20.043327 | 10.702755 |
| O | 16.386251 | 20.034008 | 8.202401  |
| O | 15.921804 | 10.021104 | 4.41675   |
| O | 18.701752 | 10.050205 | 0.376237  |
| O | 20.309933 | 10.059481 | 2.876894  |
| O | 3.397968  | 20.052713 | 4.415098  |
| O | 6.176905  | 0.017483  | 0.372267  |
| O | 7.786223  | 0.028953  | 2.872517  |
| N | 5.936473  | 7.130403  | 10.621351 |
| N | 10.739915 | 9.416298  | 6.877882  |
| N | 8.688239  | 9.338185  | 4.249465  |
| N | 4.007093  | 7.0221    | 7.926525  |
| N | 6.772086  | 6.445539  | 9.868013  |
| N | 4.926674  | 6.241412  | 7.398788  |
| N | 7.335566  | 5.518471  | 10.638332 |
| N | 2.820863  | 6.479223  | 7.626311  |
| N | 8.470799  | 8.829304  | 3.040251  |
| N | 18.461613 | 17.159712 | 10.6174   |
| N | 23.268703 | 19.446369 | 6.871607  |
| N | 21.215384 | 19.368948 | 4.243909  |
| N | 16.533638 | 17.05027  | 7.92313   |
| N | 19.297922 | 16.476213 | 9.863717  |
| N | 17.453085 | 16.269073 | 7.395857  |
| N | 19.863979 | 15.550671 | 10.633971 |
| N | 15.347239 | 16.506706 | 7.624848  |
| N | 20.999346 | 18.859459 | 3.03464   |
| N | 18.269102 | 7.142421  | 0.48251   |
| N | 13.404403 | 9.357414  | 4.466435  |
| N | 15.502139 | 9.377656  | 6.863332  |
| N | 20.21298  | 7.076297  | 3.099581  |
| N | 17.414116 | 6.488673  | 1.239603  |

---



---

|   |           |           |           |
|---|-----------|-----------|-----------|
| N | 19.327961 | 6.296389  | 3.682897  |
| N | 16.857317 | 5.539958  | 0.491138  |
| N | 21.419802 | 6.558604  | 3.35278   |
| N | 12.273743 | 8.872219  | 3.947786  |
| N | 5.742595  | 17.174032 | 0.480292  |
| N | 0.88057   | 19.388824 | 4.465036  |
| N | 2.974788  | 19.410213 | 6.861236  |
| N | 7.688634  | 17.108643 | 3.101136  |
| N | 4.887653  | 16.520817 | 1.237891  |
| N | 6.803474  | 16.328222 | 3.683689  |
| N | 4.328965  | 15.573247 | 0.489451  |
| N | 8.895644  | 16.59211  | 3.356454  |
| N | -0.251072 | 18.90295  | 3.949227  |
| N | 18.234249 | 12.933034 | 0.461527  |
| N | 13.429128 | 10.646076 | 4.205756  |
| N | 15.485173 | 10.723239 | 6.835352  |
| N | 20.162466 | 13.043429 | 3.155181  |
| N | 17.397943 | 13.617401 | 1.214557  |
| N | 19.243193 | 13.824737 | 3.682675  |
| N | 16.831095 | 14.541473 | 0.443118  |
| N | 21.34901  | 13.586672 | 3.453346  |
| N | 15.703087 | 11.231674 | 8.044727  |
| N | 5.708124  | 2.899836  | 0.456478  |
| N | 0.903889  | 0.615362  | 4.204716  |
| N | 2.957097  | 0.693589  | 6.832854  |
| N | 7.638589  | 3.011404  | 3.153996  |
| N | 4.87214   | 3.584074  | 1.209998  |
| N | 6.719333  | 3.792985  | 3.68101   |
| N | 4.304166  | 4.507612  | 0.438835  |
| N | 8.825151  | 3.553288  | 3.45455   |
| N | 3.172557  | 1.202417  | 8.042528  |
| N | 5.902409  | 12.923691 | 10.600855 |
| N | 10.765164 | 10.705007 | 6.617213  |
| N | 8.669333  | 10.683867 | 4.220988  |
| N | 3.957979  | 12.986279 | 7.982545  |
| N | 6.757397  | 13.577638 | 9.843588  |
| N | 4.842809  | 13.766385 | 7.39944   |
| N | 7.312459  | 14.527856 | 10.591461 |
| N | 2.750828  | 13.502321 | 7.727537  |
| N | 11.898191 | 11.188421 | 7.131614  |
| N | 18.427565 | 2.888611  | 10.596093 |
| N | 23.292582 | 0.672975  | 6.61143   |
| N | 21.196278 | 0.652275  | 4.215203  |
| N | 16.483128 | 2.95482   | 7.979191  |
| N | 19.282797 | 3.542177  | 9.839095  |
| N | 17.367922 | 3.734726  | 7.395525  |
| N | 19.840101 | 4.490384  | 10.587846 |
| N | 15.276102 | 3.472031  | 7.725966  |
| N | 24.424339 | 1.158157  | 7.127589  |
| C | 6.870735  | 6.648712  | 0.812682  |

---

---

|   |           |           |           |
|---|-----------|-----------|-----------|
| C | 11.851395 | 9.070608  | 7.570463  |
| C | 7.771966  | 5.601538  | 0.830475  |
| C | 2.963046  | 5.340104  | 6.902385  |
| C | 4.332655  | 5.192874  | 6.771276  |
| C | 19.397743 | 16.678587 | 0.809039  |
| C | 24.380255 | 19.102266 | 7.56545   |
| C | 20.301657 | 15.633716 | 0.826599  |
| C | 15.489059 | 15.366687 | 6.902577  |
| C | 16.858698 | 15.219422 | 6.770751  |
| C | 17.36273  | 6.610321  | 10.309072 |
| C | 15.73449  | 9.007236  | 8.13954   |
| C | 16.451849 | 5.570254  | 10.306682 |
| C | 21.326967 | 5.43435   | 4.107172  |
| C | 19.966587 | 5.27019   | 4.305755  |
| C | 4.834344  | 16.64278  | 10.3065   |
| C | 3.205143  | 19.04014  | 8.13781   |
| C | 3.922304  | 15.60367  | 10.304632 |
| C | 8.802787  | 15.468182 | 4.11121   |
| C | 7.442297  | 15.303032 | 4.308094  |
| C | 17.297169 | 13.411938 | 10.269207 |
| C | 12.319573 | 10.990058 | 3.508992  |
| C | 16.392731 | 14.456576 | 10.250407 |
| C | 21.207561 | 14.726611 | 4.175747  |
| C | 19.837929 | 14.874065 | 4.307917  |
| C | 4.769996  | 3.378534  | 10.264147 |
| C | -0.207982 | 0.958809  | 3.51103   |
| C | 3.864901  | 4.42276   | 10.245834 |
| C | 8.683688  | 4.692694  | 4.177973  |
| C | 7.314135  | 4.841316  | 4.308338  |
| C | 6.807467  | 13.457146 | 0.773604  |
| C | 8.436382  | 11.053592 | 2.94473   |
| C | 7.717039  | 14.498464 | 0.775245  |
| C | 2.843321  | 14.625725 | 6.972135  |
| C | 4.203648  | 14.791153 | 6.774673  |
| C | 19.334282 | 3.420334  | 0.769745  |
| C | 20.964396 | 1.021661  | 2.938655  |
| C | 20.245655 | 4.459989  | 0.772307  |
| C | 15.368513 | 4.596075  | 6.971208  |
| C | 16.72888  | 4.76054   | 6.772382  |
| C | 12.606463 | 10.215218 | 7.744725  |
| C | 8.304418  | 9.884973  | 2.199138  |
| C | 0.076881  | 0.185911  | 7.741609  |
| C | 20.833431 | 19.914869 | 2.193267  |
| C | 11.56657  | 9.844342  | 3.331867  |
| C | 15.868044 | 10.175574 | 8.88544   |
| C | 24.095858 | 19.874804 | 3.335229  |
| C | 3.336677  | 0.146505  | 8.883753  |
| H | 6.281837  | 7.082358  | 1.612505  |
| H | 7.96637   | 4.841059  | 10.206345 |
| H | 1.983729  | 6.943579  | 7.975107  |

---

---

|   |           |           |           |
|---|-----------|-----------|-----------|
| H | 12.033608 | 8.048411  | 7.875756  |
| H | 8.057125  | 9.756478  | 1.148043  |
| H | 8.113028  | 4.932388  | 1.60504   |
| H | 2.147385  | 4.714413  | 6.539522  |
| H | 4.889964  | 4.391735  | 6.296512  |
| H | 18.807657 | 17.109306 | 1.609743  |
| H | 20.493176 | 14.872416 | 10.201123 |
| H | 14.510351 | 16.970758 | 7.974576  |
| H | -0.490527 | 18.08016  | 7.869394  |
| H | 20.586376 | 19.785263 | 1.142214  |
| H | 20.646418 | 14.967017 | 1.601939  |
| H | 14.673384 | 14.740648 | 6.540548  |
| H | 17.415697 | 14.41744  | 6.29694   |
| H | 17.997261 | 6.993941  | 9.517579  |
| H | 16.217619 | 4.881669  | 0.939995  |
| H | 22.230024 | 7.027186  | 2.948603  |
| H | 11.978405 | 7.916588  | 4.173597  |
| H | 15.787044 | 7.960842  | 8.416595  |
| H | 16.135637 | 4.861291  | 9.555491  |
| H | 22.165224 | 4.82795   | 4.44829   |
| H | 19.439051 | 4.478407  | 4.829151  |
| H | 5.468859  | 17.025768 | 9.51468   |
| H | 3.689315  | 14.915201 | 0.938762  |
| H | 9.706131  | 17.061035 | 2.953223  |
| H | 24.510323 | 17.947243 | 4.175747  |
| H | 3.258627  | 17.993879 | 8.414873  |
| H | 3.604334  | 14.895467 | 9.553525  |
| H | 9.640814  | 14.861938 | 4.452933  |
| H | 6.914742  | 14.510966 | 4.830997  |
| H | 17.886421 | 12.979574 | 9.468751  |
| H | 16.201466 | 15.219637 | 0.875223  |
| H | 22.185699 | 13.122451 | 3.103416  |
| H | 12.136017 | 12.011946 | 3.203153  |
| H | 16.115885 | 10.303837 | 9.936501  |
| H | 16.047312 | 15.121673 | 9.473974  |
| H | 22.023439 | 15.35265  | 4.537298  |
| H | 19.281237 | 15.676154 | 4.781917  |
| H | 5.359084  | 2.946761  | 9.463148  |
| H | 3.674819  | 5.185544  | 0.871596  |
| H | 9.662145  | 3.088775  | 3.105451  |
| H | 24.662203 | 1.980825  | 3.207316  |
| H | 3.583531  | 0.275304  | 9.93496   |
| H | 3.518399  | 5.087052  | 9.469219  |
| H | 9.499752  | 5.317334  | 4.541294  |
| H | 6.757403  | 5.643135  | 4.782524  |
| H | 6.173559  | 13.073077 | 1.565532  |
| H | 7.953794  | 15.18505  | 10.143534 |
| H | 1.940827  | 13.03267  | 8.130733  |
| H | 12.193851 | 12.143816 | 6.90493   |
| H | 8.381778  | 12.099716 | 2.667263  |

---

|          |           |           |           |
|----------|-----------|-----------|-----------|
| H        | 8.031068  | 15.209494 | 1.525254  |
| H        | 2.005086  | 15.230738 | 6.629454  |
| H        | 4.731073  | 15.582547 | 6.250656  |
| H        | 18.699297 | 3.037045  | 1.561037  |
| H        | 20.479647 | 5.148788  | 10.138908 |
| H        | 14.466042 | 3.003511  | 8.130466  |
| H        | -0.336418 | 2.113686  | 6.901171  |
| H        | 20.909647 | 2.067684  | 2.660825  |
| H        | 20.562279 | 5.168363  | 1.523868  |
| H        | 14.530132 | 5.202385  | 6.630358  |
| H        | 17.2561   | 5.552501  | 6.248971  |
| H        | 13.546021 | 10.410562 | 8.246561  |
| H        | 1.014736  | 0.382973  | 8.246365  |
| H        | 10.629078 | 9.648086  | 2.825889  |
| H        | 23.157654 | 19.677492 | 2.831301  |
| Na       | 5.94146   | 9.996577  | 6.654454  |
| Na       | 18.4625   | 20.0252   | 6.639304  |
| Na       | 18.234697 | 10.068712 | 4.438597  |
| Na       | 5.709928  | 0.03874   | 4.435613  |
| <b>3</b> |           |           |           |
| Mo       | 22.706888 | 8.602207  | 1.581436  |
| Mo       | 27.967213 | 9.18552   | 2.892461  |
| Mo       | 24.888796 | 7.344602  | 2.064993  |
| Mo       | 3.875364  | 19.049379 | 3.866715  |
| Mo       | 9.147764  | 19.632765 | 5.179842  |
| Mo       | 6.074483  | 17.797491 | 4.341777  |
| Mo       | 15.153028 | 8.622213  | 3.376291  |
| Mo       | 9.897715  | 9.177008  | 2.131129  |
| Mo       | 12.983281 | 7.343887  | 2.906757  |
| Mo       | 34.064213 | 19.051489 | 1.30343   |
| Mo       | 27.682566 | 19.623264 | 9.324048  |
| Mo       | 31.870348 | 17.78916  | 0.814233  |
| Mo       | 15.145333 | 12.264877 | 3.40979   |
| Mo       | 9.896401  | 11.708123 | 2.133294  |
| Mo       | 12.983602 | 13.54164  | 2.902452  |
| Mo       | 22.670305 | 12.246452 | 1.558345  |
| Mo       | 27.949894 | 11.720693 | 2.885433  |
| Mo       | 24.833874 | 13.537415 | 2.060389  |
| Mo       | 34.065411 | 1.830671  | 1.349569  |
| Mo       | 27.682411 | 1.269918  | 9.307073  |
| Mo       | 31.887794 | 3.100629  | 0.774589  |
| Mo       | 3.882379  | 1.826478  | 3.778856  |
| Mo       | 9.15008   | 1.286008  | 5.180263  |
| Mo       | 6.068007  | 3.096645  | 4.274051  |
| O        | 26.126219 | 8.881311  | 2.432835  |
| O        | 23.639774 | 8.149027  | 3.301814  |
| O        | 24.297594 | 8.080509  | 0.402278  |
| O        | 21.499441 | 7.422425  | 1.32579   |
| O        | 29.528175 | 8.484166  | 3.160198  |
| O        | 24.660938 | 5.630446  | 2.120292  |

---

|   |           |           |          |
|---|-----------|-----------|----------|
| O | 7.315215  | 19.334677 | 4.652093 |
| O | 4.812946  | 18.59573  | 5.574944 |
| O | 5.46105   | 18.523884 | 2.68197  |
| O | 2.666832  | 17.864267 | 3.622667 |
| O | 10.688557 | 18.92412  | 5.514308 |
| O | 5.902032  | 16.075869 | 4.40375  |
| O | 11.73593  | 8.881704  | 2.599549 |
| O | 14.227179 | 8.149051  | 1.659798 |
| O | 13.580682 | 8.079988  | 4.564242 |
| O | 16.365536 | 7.441998  | 3.634045 |
| O | 8.345246  | 8.481824  | 1.810434 |
| O | 13.213895 | 5.628712  | 2.843836 |
| O | 30.6348   | 19.328354 | 0.397286 |
| O | 32.005138 | 18.594902 | 9.046916 |
| O | 32.464375 | 18.536741 | 2.463208 |
| O | 35.262226 | 17.862526 | 1.572536 |
| O | 26.127296 | 18.921608 | 9.036042 |
| O | 32.094379 | 16.075541 | 0.788295 |
| O | 11.734775 | 12.002317 | 2.599836 |
| O | 14.233667 | 12.730402 | 1.669046 |
| O | 13.572658 | 12.807755 | 4.567346 |
| O | 16.372746 | 13.443414 | 3.623288 |
| O | 8.344729  | 12.40194  | 1.810605 |
| O | 13.214908 | 15.255516 | 2.842115 |
| O | 26.118547 | 12.004781 | 2.364479 |
| O | 23.575924 | 12.727414 | 3.293193 |
| O | 24.229136 | 12.805656 | 0.396243 |
| O | 21.413212 | 13.383975 | 1.3379   |
| O | 29.519768 | 12.403444 | 3.157534 |
| O | 24.581705 | 15.248217 | 2.118068 |
| O | 23.519228 | 10.438106 | 1.726519 |
| O | 27.563532 | 10.448016 | 4.324444 |
| O | 28.150551 | 10.443407 | 1.409813 |
| O | 14.294714 | 10.443349 | 3.236384 |
| O | 10.306623 | 10.442451 | 0.705366 |
| O | 9.707673  | 10.44141  | 3.621329 |
| O | 30.645754 | 1.556821  | 0.393969 |
| O | 32.068459 | 2.289042  | 9.049808 |
| O | 32.453907 | 2.362848  | 2.454268 |
| O | 35.264603 | 3.021948  | 1.571684 |
| O | 26.133127 | 1.960932  | 8.971176 |
| O | 32.109238 | 4.812612  | 0.716045 |
| O | 7.310781  | 1.560331  | 4.649318 |
| O | 4.815588  | 2.290623  | 5.503309 |
| O | 5.473696  | 2.360573  | 2.606555 |
| O | 2.667767  | 3.016984  | 3.621316 |
| O | 10.680335 | 2.030092  | 5.514499 |
| O | 5.840059  | 4.809759  | 4.323843 |
| O | 4.698899  | 0.000717  | 3.933104 |
| O | 8.728353  | 0.010272  | 6.606462 |

---

---

|   |           |           |          |
|---|-----------|-----------|----------|
| O | 9.396524  | 0.009523  | 3.705027 |
| O | 33.244057 | 0.001145  | 1.193908 |
| O | 28.094015 | 20.881578 | 7.881891 |
| O | 28.552748 | 0.006169  | 1.339492 |
| N | 20.782925 | 9.733125  | 9.289729 |
| N | 25.977373 | 7.004424  | 4.250982 |
| N | 21.272167 | 9.723537  | 2.818286 |
| N | 27.04192  | 7.675206  | 4.649929 |
| N | 27.984747 | 7.490604  | 1.248834 |
| N | 20.277534 | 9.221203  | 3.539189 |
| N | 26.922052 | 6.804643  | 0.873821 |
| N | 25.204575 | 6.797866  | 5.325887 |
| N | 29.048523 | 6.950943  | 0.639679 |
| N | 2.82472   | 20.185276 | 2.26661  |
| N | 7.095855  | 17.530806 | 6.540517 |
| N | 2.542961  | 20.222055 | 5.194692 |
| N | 8.17293   | 18.183989 | 6.933799 |
| N | 9.179542  | 17.959055 | 3.496547 |
| N | 1.820115  | 19.759865 | 6.210071 |
| N | 8.11284   | 17.274933 | 3.132105 |
| N | 6.30592   | 17.374161 | 7.611175 |
| N | 10.231625 | 17.444159 | 2.848068 |
| N | 15.951432 | 9.754819  | 5.110708 |
| N | 11.894934 | 7.014448  | 0.777141 |
| N | 16.573486 | 9.775332  | 2.138743 |
| N | 10.820824 | 7.671986  | 0.384054 |
| N | 9.879416  | 7.481681  | 3.764556 |
| N | 17.577908 | 9.292349  | 1.416499 |
| N | 10.946392 | 6.790644  | 4.119794 |
| N | 11.526178 | 6.782638  | 9.141767 |
| N | 8.821622  | 6.937862  | 4.381072 |
| N | 35.093033 | 20.19198  | 2.910581 |
| N | 29.736374 | 17.449821 | 8.024595 |
| N | 34.310673 | 20.211554 | 9.445161 |
| N | 28.685341 | 18.116814 | 7.580062 |
| N | 28.761366 | 17.961824 | 1.569154 |
| N | 35.014301 | 19.743883 | 8.42078  |
| N | 29.818455 | 17.287079 | 1.978238 |
| N | 30.578331 | 17.295435 | 6.993874 |
| N | 27.68959  | 17.452232 | 2.187535 |
| N | 15.891791 | 11.110542 | 5.136372 |
| N | 11.904915 | 13.850895 | 0.76273  |
| N | 16.618422 | 11.133707 | 2.201787 |
| N | 10.814631 | 13.21026  | 0.384546 |
| N | 9.877897  | 13.406403 | 3.770774 |
| N | 16.297318 | 11.590746 | 6.305637 |
| N | 10.947745 | 14.101579 | 4.108582 |
| N | 11.538784 | 14.037094 | 9.121838 |
| N | 8.828037  | 13.949079 | 4.40275  |
| N | 20.799894 | 11.09184  | 9.279921 |

---

---

|   |           |           |          |
|---|-----------|-----------|----------|
| N | 25.904577 | 13.861512 | 4.185063 |
| N | 21.222383 | 11.083627 | 2.778718 |
| N | 26.985134 | 13.216278 | 4.586562 |
| N | 27.951548 | 13.454166 | 1.268713 |
| N | 20.37005  | 11.575802 | 8.12064  |
| N | 26.878767 | 14.116712 | 0.875706 |
| N | 25.155327 | 14.107966 | 5.2679   |
| N | 29.017023 | 14.028379 | 0.696122 |
| N | 35.014633 | 0.668563  | 2.994576 |
| N | 29.741638 | 3.423894  | 8.043684 |
| N | 35.474846 | 0.681439  | 0.053169 |
| N | 28.67614  | 2.768682  | 7.619608 |
| N | 28.761585 | 2.93805   | 1.503517 |
| N | 35.934792 | 1.146861  | 3.829462 |
| N | 29.809996 | 3.635445  | 1.901492 |
| N | 30.515785 | 3.665673  | 6.978998 |
| N | 27.681389 | 3.441821  | 2.113989 |
| N | 2.910069  | 0.661117  | 2.168694 |
| N | 7.091871  | 3.4439    | 6.470793 |
| N | 2.491095  | 0.691186  | 5.119983 |
| N | 8.133929  | 2.764074  | 6.912974 |
| N | 9.183294  | 2.933168  | 3.516804 |
| N | 1.987079  | 1.139704  | 1.337614 |
| N | 8.131431  | 3.607547  | 3.090326 |
| N | 6.279799  | 3.660418  | 7.515424 |
| N | 10.264901 | 3.43856   | 2.912221 |
| C | 20.312664 | 9.341174  | 8.084794 |
| C | 25.751902 | 7.354095  | 6.435772 |
| C | 26.945967 | 7.900108  | 5.991487 |
| C | 27.312067 | 5.81503   | 0.017903 |
| C | 27.561716 | 5.903263  | 9.307661 |
| C | 1.806847  | 19.801443 | 1.466977 |
| C | 6.859379  | 17.938841 | 8.714147 |
| C | 8.071518  | 18.442038 | 8.269486 |
| C | 8.489753  | 16.304346 | 2.24875  |
| C | 9.857563  | 16.405199 | 2.060444 |
| C | 16.419403 | 9.360166  | 6.315637 |
| C | 10.953367 | 7.308507  | 8.029929 |
| C | 9.765786  | 7.861491  | 8.483334 |
| C | 10.564966 | 5.797535  | 4.975151 |
| C | 9.193998  | 5.88398   | 5.148424 |
| C | 36.103436 | 19.807468 | 3.719357 |
| C | 30.090033 | 17.875216 | 5.868454 |
| C | 28.86058  | 18.385981 | 6.254843 |
| C | 29.414545 | 16.32856  | 2.863434 |
| C | 28.040598 | 16.427141 | 3.003339 |
| C | 17.696009 | 11.522165 | 1.485843 |
| C | 10.948661 | 13.50968  | 8.01991  |
| C | 9.749803  | 12.994219 | 8.487403 |
| C | 10.57723  | 15.09649  | 4.966663 |

---

---

|   |           |           |          |
|---|-----------|-----------|----------|
| C | 9.209167  | 15.006834 | 5.161078 |
| C | 20.145405 | 11.452005 | 3.506641 |
| C | 25.739058 | 13.612953 | 6.388248 |
| C | 26.92639  | 13.056293 | 5.939531 |
| C | 27.26741  | 15.126338 | 0.042256 |
| C | 27.522867 | 15.074282 | 9.364452 |
| C | 19.557053 | 10.279924 | 3.975274 |
| C | 20.066046 | 10.500687 | 7.355243 |
| C | 18.293537 | 10.361721 | 1.000688 |
| C | 16.624369 | 10.516604 | 7.062219 |
| C | 35.123341 | 1.091882  | 8.469169 |
| C | 29.966658 | 3.155997  | 5.847209 |
| C | 28.771338 | 2.596354  | 6.270312 |
| C | 29.38941  | 4.603007  | 2.769074 |
| C | 28.016665 | 4.486157  | 2.911531 |
| C | 1.697158  | 1.107875  | 6.131583 |
| C | 6.778608  | 3.101826  | 8.646938 |
| C | 7.983868  | 2.542854  | 8.249931 |
| C | 8.552016  | 4.565382  | 2.211859 |
| C | 9.927763  | 4.46232   | 2.089684 |
| C | 1.285954  | 20.850151 | 6.816325 |
| C | 1.289441  | 0.072222  | 0.886707 |
| C | 35.530518 | 20.829306 | 7.791157 |
| C | 36.62373  | 0.079669  | 4.293281 |
| H | 27.704752 | 8.460194  | 6.522359 |
| H | 24.254486 | 6.452621  | 5.165723 |
| H | 25.482813 | 5.099918  | 9.060332 |
| H | 28.285952 | 5.312499  | 8.762008 |
| H | 29.9788   | 7.287782  | 0.901658 |
| H | 20.186321 | 8.293377  | 7.845829 |
| H | 19.864525 | 12.491663 | 3.615231 |
| H | 5.344162  | 17.064495 | 7.44485  |
| H | 7.778243  | 15.59267  | 1.84627  |
| H | 10.574974 | 15.827387 | 1.491947 |
| H | 11.168413 | 17.777042 | 3.087569 |
| H | 1.515443  | 18.761898 | 1.391581 |
| H | 8.991789  | 8.402188  | 7.954229 |
| H | 12.48306  | 6.453077  | 9.297177 |
| H | 11.275189 | 5.080844  | 5.371259 |
| H | 8.474752  | 5.288575  | 5.696158 |
| H | 7.886609  | 7.270164  | 4.131355 |
| H | 16.570814 | 8.313021  | 6.542624 |
| H | 17.970928 | 12.565157 | 1.396322 |
| H | 28.125988 | 18.95068  | 5.695685 |
| H | 31.526777 | 16.970739 | 7.200658 |
| H | 30.113333 | 15.624013 | 3.298942 |
| H | 27.308167 | 15.854474 | 3.557333 |
| H | 26.763746 | 17.786964 | 1.909441 |
| H | 36.388405 | 18.766888 | 3.80341  |
| H | 8.961326  | 12.461503 | 7.971715 |

---



|          |           |           |           |
|----------|-----------|-----------|-----------|
| H        | 12.501505 | 14.35528  | 9.263395  |
| H        | 11.293357 | 15.814068 | 5.350529  |
| H        | 8.495569  | 15.601068 | 5.717958  |
| H        | 7.888804  | 13.615638 | 4.172174  |
| H        | 19.207607 | 10.235254 | 0.433504  |
| H        | 27.706583 | 12.532363 | 6.476295  |
| H        | 24.200069 | 14.442564 | 5.115517  |
| H        | 25.432566 | 15.831815 | 9.077035  |
| H        | 28.2446   | 15.687625 | 8.839495  |
| H        | 29.949562 | 13.706779 | 0.969869  |
| H        | 18.646511 | 10.137538 | 4.544438  |
| H        | 11.431541 | 7.269364  | 7.059059  |
| H        | 30.646885 | 17.899035 | 4.937908  |
| H        | 11.424023 | 13.526311 | 7.046589  |
| H        | 19.707081 | 10.619492 | 6.343356  |
| H        | 30.467646 | 3.201272  | 4.887379  |
| H        | 0.454224  | 0.191478  | 0.207791  |
| H        | 0.670032  | 20.75399  | 7.702293  |
| H        | 28.008324 | 2.062651  | 5.718762  |
| H        | 31.459293 | 4.022139  | 7.149609  |
| H        | 30.075508 | 5.328537  | 3.190749  |
| H        | 27.273396 | 5.059542  | 3.451936  |
| H        | 26.759676 | 3.09078   | 1.842286  |
| H        | 35.320446 | 2.142698  | 8.301567  |
| H        | 8.718434  | 1.979514  | 8.810776  |
| H        | 5.341715  | 4.018492  | 7.320505  |
| H        | 7.863341  | 5.275664  | 1.769231  |
| H        | 10.672929 | 5.03269   | 1.549517  |
| H        | 11.187492 | 3.103696  | 3.201189  |
| H        | 1.485454  | 2.158828  | 6.27938   |
| H        | 36.129913 | 20.726364 | 6.894907  |
| H        | 25.253132 | 7.339122  | 7.397298  |
| H        | 7.475335  | 17.953867 | 0.224387  |
| H        | 8.841658  | 18.99234  | 8.793952  |
| H        | 16.966822 | 10.634036 | 8.080334  |
| H        | 25.267488 | 13.670826 | 7.361677  |
| H        | 37.45694  | 0.200574  | 4.974587  |
| H        | 7.366235  | 3.121354  | 0.141827  |
| Na       | 24.453979 | 10.44203  | 3.779171  |
| Na       | 25.559031 | 10.442059 | 0.474795  |
| Na       | 5.624477  | 0.080958  | 6.061768  |
| Na       | 6.721057  | 0.080714  | 2.834873  |
| Na       | 13.341849 | 10.442013 | 1.181517  |
| Na       | 12.219172 | 10.442048 | 4.640191  |
| Na       | 31.178913 | 0.080744  | 8.580913  |
| Na       | 31.223309 | 0.080908  | 2.204771  |
| <b>4</b> |           |           |           |
| Mo       | 6.785831  | 22.817331 | 14.532247 |
| Mo       | 6.688537  | 21.060431 | 12.688519 |
| Mo       | 5.959727  | 26.283018 | 13.662039 |

---

|    |          |           |           |
|----|----------|-----------|-----------|
| Mo | 5.535107 | 21.941019 | 9.302183  |
| Mo | 4.960754 | 24.353203 | 8.724031  |
| Mo | 5.258071 | 26.960011 | 11.293939 |
| Mo | 3.402    | 4.994622  | 16.937012 |
| Mo | 3.503699 | 3.220003  | 18.773838 |
| Mo | 4.198612 | 8.474259  | 17.776669 |
| Mo | 4.497529 | 4.099192  | 1.95195   |
| Mo | 5.0019   | 6.539643  | 2.488979  |
| Mo | 4.861427 | 9.148378  | 20.159321 |
| Mo | 3.159385 | 12.836545 | 6.216777  |
| Mo | 3.227076 | 14.60958  | 8.048153  |
| Mo | 3.981136 | 9.35392   | 7.050758  |
| Mo | 4.341693 | 13.736729 | 11.460111 |
| Mo | 4.879213 | 11.298841 | 11.989301 |
| Mo | 4.614202 | 8.676224  | 9.434394  |
| Mo | 6.475089 | 30.643291 | 3.839751  |
| Mo | 6.371621 | 32.415703 | 1.997739  |
| Mo | 5.702393 | 27.171764 | 2.956193  |
| Mo | 5.4509   | 31.535408 | 18.80224  |
| Mo | 4.956136 | 29.102335 | 18.225082 |
| Mo | 5.026045 | 26.504358 | 0.579951  |
| Na | 7.433155 | 24.171324 | 11.305494 |
| Na | 4.24505  | 23.593618 | 12.194843 |
| Na | 2.770761 | 6.352537  | 20.185844 |
| Na | 5.958242 | 5.775078  | 19.296946 |
| Na | 2.443081 | 11.465919 | 9.465497  |
| Na | 5.631105 | 12.043583 | 8.577188  |
| Na | 7.103965 | 29.284557 | 0.664608  |
| Na | 3.917799 | 29.86183  | 1.474731  |
| O  | 5.204862 | 25.077013 | 10.503042 |
| O  | 6.309764 | 24.338709 | 13.340458 |
| O  | 8.103214 | 22.278425 | 13.111266 |
| O  | 5.285912 | 21.767628 | 13.825922 |
| O  | 6.044944 | 22.178164 | 11.187716 |
| O  | 7.030967 | 26.638666 | 12.032657 |
| O  | 6.695375 | 23.422831 | 8.780121  |
| O  | 3.968836 | 27.230537 | 2.106365  |
| O  | 3.789308 | 30.595974 | 19.001579 |
| O  | 4.708354 | 24.827244 | 0.575844  |
| O  | 6.767741 | 0.131284  | 2.585014  |
| O  | 5.369935 | 32.594765 | 17.442333 |
| O  | 7.0897   | 31.346394 | 5.274614  |
| O  | 4.37768  | 28.956059 | 16.597485 |
| O  | 4.223904 | 26.218645 | 12.825356 |
| O  | 3.854546 | 22.857042 | 9.514001  |
| O  | 4.883421 | 28.626091 | 11.300484 |
| O  | 7.089263 | 19.461035 | 13.228201 |
| O  | 5.481591 | 20.86611  | 7.937309  |
| O  | 7.345899 | 22.112053 | 15.99179  |
| O  | 4.345175 | 24.423462 | 7.105723  |

---

---

|   |          |           |           |
|---|----------|-----------|-----------|
| O | 6.132765 | 27.716269 | 14.611461 |
| O | 4.715248 | 7.246997  | 0.707643  |
| O | 3.893534 | 6.524577  | 18.091112 |
| O | 2.102236 | 4.464186  | 18.37307  |
| O | 4.913151 | 3.953112  | 17.660418 |
| O | 3.951516 | 4.287069  | 0.091759  |
| O | 3.100107 | 8.822514  | 19.386932 |
| O | 3.299998 | 5.530875  | 2.48991   |
| O | 5.919318 | 8.402251  | 18.653942 |
| O | 6.154892 | 5.038302  | 1.69097   |
| O | 5.239186 | 10.812963 | 20.189459 |
| O | 3.106894 | 1.644271  | 18.185471 |
| O | 4.586097 | 3.047043  | 3.31827   |
| O | 2.786956 | 4.290503  | 15.500344 |
| O | 5.648376 | 6.680461  | 4.09245   |
| O | 4.065617 | 9.896981  | 16.809393 |
| O | 4.605254 | 10.568702 | 10.207616 |
| O | 3.641227 | 11.301535 | 7.368832  |
| O | 1.844054 | 13.355444 | 7.65306   |
| O | 4.651194 | 13.934958 | 6.932967  |
| O | 3.829054 | 13.532055 | 9.581317  |
| O | 2.859293 | 8.997885  | 8.65269   |
| O | 3.167394 | 12.278961 | 11.989674 |
| O | 5.702875 | 9.413918  | 7.939583  |
| O | 5.980753 | 12.778964 | 11.180279 |
| O | 4.989986 | 7.01026   | 9.467477  |
| O | 2.78684  | 16.183229 | 7.472003  |
| O | 2.538782 | 13.529173 | 4.777027  |
| O | 5.530975 | 11.21454  | 13.590229 |
| O | 4.469521 | 14.781107 | 12.83948  |
| O | 3.82482  | 7.926314  | 6.085108  |
| O | 5.164152 | 28.390984 | 20.005987 |
| O | 5.98186  | 29.119625 | 2.682027  |
| O | 7.773343 | 31.172186 | 2.40256   |
| O | 4.963015 | 31.682125 | 3.11413   |
| O | 5.718771 | 31.343306 | 0.467903  |
| O | 6.783467 | 26.890112 | 1.31765   |
| O | 5.888165 | 25.734055 | 3.886508  |
| O | 6.656989 | 30.102602 | 18.277874 |
| N | 8.079029 | 20.463299 | 10.772176 |
| N | 7.543246 | 20.800064 | 9.618957  |
| N | 8.346991 | 24.516558 | 15.032125 |
| N | 6.102183 | 26.224054 | 8.321166  |
| N | 5.246789 | 23.943237 | 15.683232 |
| N | 4.944386 | 19.889111 | 11.662383 |
| N | 3.257318 | 26.79501  | 10.047899 |
| N | 6.251214 | 27.160496 | 9.293505  |
| N | 7.980293 | 25.737118 | 14.70028  |
| N | 3.176311 | 25.847128 | 9.134723  |
| N | 5.014597 | 25.256311 | 15.428709 |

---

---

|   |          |           |           |
|---|----------|-----------|-----------|
| N | 4.508447 | 20.120193 | 10.440916 |
| N | 0.42959  | 26.555828 | 14.990149 |
| N | 6.939515 | 28.205976 | 8.854117  |
| N | 8.352549 | 20.370279 | 8.64604   |
| N | 4.546806 | 23.517956 | 16.729418 |
| N | 1.987072 | 25.980362 | 8.53142   |
| N | 4.325682 | 18.795557 | 12.114584 |
| N | 2.127948 | 3.064918  | 1.629599  |
| N | 1.690017 | 2.878495  | 0.398484  |
| N | 1.812385 | 6.669291  | 16.479132 |
| N | 3.733045 | 8.333317  | 2.871423  |
| N | 4.872657 | 6.161422  | 15.71342  |
| N | 5.164605 | 1.956043  | 19.823273 |
| N | 6.635828 | 8.995172  | 1.180217  |
| N | 3.60886  | 9.303796  | 1.924218  |
| N | 2.134501 | 7.906523  | 16.789875 |
| N | 6.735604 | 8.029273  | 2.067827  |
| N | 5.094909 | 7.477544  | 15.972563 |
| N | 5.451806 | 2.161444  | 0.81222   |
| N | 1.048165 | 8.661513  | 16.589716 |
| N | 1.058423 | 3.385268  | 2.378274  |
| N | 2.84166  | 10.297964 | 2.351853  |
| N | 5.437013 | 5.788662  | 14.56905  |
| N | 7.925062 | 8.166515  | 2.670229  |
| N | 5.562971 | 0.74564   | 19.420504 |
| N | 2.340657 | 14.917206 | 11.185897 |
| N | 1.796669 | 15.255351 | 10.036322 |
| N | 1.60571  | 11.124895 | 5.683251  |
| N | 3.730653 | 9.423304  | 12.390119 |
| N | 4.692268 | 11.707645 | 5.038248  |
| N | 4.935461 | 15.823207 | 9.09759   |
| N | 6.596077 | 8.8544    | 10.686322 |
| N | 3.571905 | 8.491203  | 11.413116 |
| N | 1.977887 | 9.902466  | 5.998173  |
| N | 6.6664   | 9.820768  | 11.575747 |
| N | 4.954233 | 10.400352 | 5.311611  |
| N | 5.364544 | 15.593194 | 10.322962 |
| N | 0.968667 | 9.081349  | 5.696157  |
| N | 2.904746 | 7.435135  | 11.85822  |
| N | 1.535632 | 15.343854 | 12.168116 |
| N | 5.546821 | 16.92511  | 8.653389  |
| N | 5.359543 | 12.123466 | 3.968513  |
| N | 7.867458 | 9.731828  | 12.165154 |
| N | 7.746648 | 32.50671  | 19.162241 |
| N | 7.977665 | 32.758671 | 0.161665  |
| N | 8.108003 | 28.963009 | 4.268715  |
| N | 6.214512 | 27.300903 | 17.881014 |
| N | 5.012305 | 29.445156 | 5.063138  |
| N | 4.727768 | 33.666435 | 0.91697   |
| N | 3.247998 | 26.646467 | 19.557308 |

---

---

|   |          |           |           |
|---|----------|-----------|-----------|
| N | 6.288388 | 26.327374 | 18.827818 |
| N | 7.796969 | 27.737179 | 3.90511   |
| N | 3.187923 | 27.572117 | 18.621662 |
| N | 4.798366 | 28.131157 | 4.779726  |
| N | 4.460786 | 33.432991 | 19.925692 |
| N | 0.335976 | 26.991112 | 4.027918  |
| N | 7.04251  | 25.31646  | 18.419294 |
| N | 4.440314 | 29.788605 | 6.212065  |
| N | 1.989613 | 27.459799 | 18.032198 |
| N | 0.253598 | 32.208076 | 18.410986 |
| N | 4.313694 | 1.019771  | 1.290764  |
| H | 0.314121 | 27.544754 | 14.766035 |
| H | 8.06012  | 20.544765 | 7.681556  |
| H | 1.300301 | 19.444532 | 11.349942 |
| H | 1.549235 | 23.655039 | 15.881807 |
| H | 1.764179 | 25.335606 | 7.774901  |
| H | 3.183123 | 19.109989 | 9.107474  |
| H | 2.926752 | 17.38072  | 11.327377 |
| H | 4.60177  | 18.432169 | 13.029509 |
| H | 6.687849 | 26.14876  | 6.280786  |
| H | 1.980617 | 28.375912 | 10.700585 |
| H | 2.431152 | 26.3186   | 15.752857 |
| H | 1.649545 | 19.31761  | 8.541107  |
| H | 0.272889 | 27.275969 | 8.735682  |
| H | 7.750597 | 28.684547 | 6.950615  |
| H | 3.220053 | 24.517189 | 18.056679 |
| H | 3.8657   | 26.734119 | 16.427832 |
| H | 1.110069 | 9.654191  | 16.814762 |
| H | 1.217716 | 3.655441  | 3.348723  |
| H | 8.566185 | 3.000373  | 19.649956 |
| H | 8.610121 | 5.700254  | 15.763162 |
| H | 6.629357 | 0.982065  | 2.163305  |
| H | 8.148764 | 7.522895  | 3.427004  |
| H | 6.492307 | 33.00119  | 0.030983  |
| H | 5.168995 | 0.383252  | 18.547255 |
| H | 2.982971 | 8.148332  | 4.857132  |
| H | 7.879023 | 10.615038 | 0.560447  |
| H | 7.572887 | 8.303151  | 15.970999 |
| H | 7.513555 | 3.715675  | 2.029418  |
| H | 1.051822 | 9.489456  | 2.48682   |
| H | 1.883218 | 10.662166 | 4.215951  |
| H | 6.54987  | 6.860958  | 13.112517 |
| H | 6.034106 | 9.023369  | 14.862654 |
| H | 1.09015  | 8.090116  | 5.90636   |
| H | 1.823585 | 15.156992 | 13.131054 |
| H | 8.567822 | 16.269329 | 9.475741  |
| H | 8.402534 | 11.989141 | 4.84032   |
| H | 8.077523 | 10.394176 | 12.910261 |
| H | 6.672229 | 16.614408 | 11.667111 |
| H | 6.923935 | 18.351824 | 9.453239  |

---

---

|   |          |           |           |
|---|----------|-----------|-----------|
| H | 5.281066 | 17.286421 | 7.734648  |
| H | 3.190692 | 9.473833  | 14.442577 |
| H | 7.899668 | 7.288558  | 10.048058 |
| H | 7.536285 | 9.316805  | 4.92551   |
| H | 8.233902 | 16.389887 | 12.284548 |
| H | 1.037537 | 8.460512  | 11.973005 |
| H | 2.130714 | 6.935262  | 13.771328 |
| H | 6.675922 | 11.125734 | 2.629593  |
| H | 6.106265 | 8.927861  | 4.310185  |
| H | 0.282023 | 26.010332 | 3.753878  |
| H | 8.655843 | 31.891069 | 17.45507  |
| H | 1.324349 | 32.75581  | 1.108042  |
| H | 1.320032 | 29.922688 | 4.976639  |
| H | 1.779675 | 28.08997  | 17.260695 |
| H | 3.298001 | 0.715325  | 18.533033 |
| H | 3.169532 | 2.596771  | 0.414251  |
| H | 4.691111 | 1.399975  | 2.163518  |
| H | 7.008258 | 27.46427  | 15.910325 |
| H | 1.727254 | 25.112293 | 0.034139  |
| H | 2.389868 | 27.35227  | 4.598127  |
| H | 2.37714  | 31.990837 | 18.739487 |
| H | 0.242826 | 26.218786 | 18.279091 |
| H | 3.322153 | 28.688057 | 7.639719  |
| H | 8.036933 | 24.925787 | 16.579144 |
| H | 3.859677 | 26.559643 | 5.854093  |
| C | 0.686416 | 19.806561 | 10.535942 |
| C | 1.046263 | 24.55151  | 15.540863 |
| C | 3.614576 | 19.149105 | 10.098902 |
| C | 3.486662 | 18.290037 | 11.174093 |
| C | 6.718556 | 26.698814 | 7.214918  |
| C | 2.112704 | 27.533634 | 10.03348  |
| C | 1.480797 | 25.864531 | 15.505367 |
| C | 0.874057 | 19.740328 | 9.165335  |
| C | 1.275361 | 27.011309 | 9.062755  |
| C | 7.241162 | 27.945047 | 7.55596   |
| C | 3.847549 | 24.590429 | 17.176018 |
| C | 4.142482 | 25.686342 | 16.366955 |
| C | 0.34196  | 3.076934  | 0.361463  |
| C | 0.511683 | 6.626529  | 16.075075 |
| C | 6.170513 | 1.062338  | 1.185122  |
| C | 6.112426 | 0.144207  | 0.1509    |
| C | 3.009439 | 8.730987  | 3.942034  |
| C | 7.765531 | 9.755094  | 1.207874  |
| C | 8.566265 | 7.909441  | 16.154129 |
| C | 8.484257 | 3.419242  | 1.635871  |
| C | 0.048925 | 9.22398   | 2.16211   |
| C | 2.459062 | 9.968616  | 3.613074  |
| C | 6.035814 | 6.895793  | 14.065521 |
| C | 5.815628 | 7.962631  | 14.935616 |
| C | 0.624477 | 15.90786  | 10.284249 |

---

|   |          |           |           |
|---|----------|-----------|-----------|
| C | 0.343217 | 11.090237 | 5.170469  |
| C | 6.246623 | 16.572206 | 10.673063 |
| C | 6.374169 | 17.435532 | 9.601023  |
| C | 3.142094 | 8.932058  | 13.504431 |
| C | 7.756611 | 8.140556  | 10.700363 |
| C | 8.481291 | 9.774213  | 5.18607   |
| C | 0.443377 | 15.970773 | 11.656237 |
| C | 8.593379 | 8.702205  | 11.649405 |
| C | 2.624578 | 7.683449  | 13.163804 |
| C | 6.069921 | 11.056996 | 3.52562   |
| C | 5.812676 | 9.97133   | 4.36061   |
| C | 0.768713 | 32.621979 | 0.188704  |
| C | 0.855962 | 29.006432 | 4.632393  |
| C | 3.739491 | 0.657713  | 19.520653 |
| C | 3.564632 | 1.5956    | 0.319218  |
| C | 6.950204 | 26.884247 | 16.825449 |
| C | 2.08615  | 25.935713 | 19.566185 |
| C | 1.384731 | 27.738276 | 4.468912  |
| C | 1.400752 | 32.255386 | 19.139521 |
| C | 1.2563   | 26.459373 | 18.591442 |
| C | 7.462186 | 25.633667 | 17.166801 |
| C | 3.842713 | 28.671206 | 6.690163  |
| C | 4.073061 | 27.622694 | 5.801127  |

---

**1-1**


---

|    |           |           |           |
|----|-----------|-----------|-----------|
| Mo | -0.922591 | 2.999108  | -0.049446 |
| Mo | -2.848017 | 1.319504  | -0.058104 |
| Mo | -2.137235 | -2.299197 | 0.023001  |
| Mo | 3.059727  | -0.702527 | 0.057281  |
| Mo | 0.279554  | -3.125531 | -0.024298 |
| Mo | 2.566552  | 1.804361  | 0.048541  |
| O  | -1.821845 | 2.075842  | 1.421893  |
| O  | -1.937168 | -0.380609 | -0.045082 |
| O  | -0.898365 | -2.683788 | 1.476774  |
| O  | -1.902735 | 2.188111  | -1.529268 |
| O  | 0.638104  | 1.864566  | -0.00056  |
| O  | 1.297606  | -1.487277 | 0.043462  |
| O  | 2.844395  | 0.563482  | 1.52852   |
| O  | 2.711841  | 0.524603  | -1.422708 |
| O  | -0.934679 | -2.671484 | -1.478072 |
| O  | -1.496186 | 4.640747  | 0.095876  |
| O  | -4.398311 | 2.108777  | 0.081245  |
| O  | -3.276973 | -3.616779 | -0.051284 |
| O  | 4.76872   | -1.028273 | -0.082071 |
| O  | 4.025343  | 2.750948  | -0.096113 |
| O  | 0.374095  | -4.864992 | 0.050316  |
| N  | 4.069607  | -2.866881 | -2.265232 |
| H  | 4.918529  | -2.30489  | -2.172052 |
| N  | 3.055805  | -2.523376 | -1.497458 |
| N  | 0.665469  | 3.94961   | -1.662718 |
| N  | 2.099733  | -3.378872 | -1.66343  |

---

|            |           |           |           |
|------------|-----------|-----------|-----------|
| N          | 1.873724  | 3.513293  | -1.506122 |
| N          | -4.025146 | -0.13839  | -1.675782 |
| N          | -3.959656 | -0.122986 | 1.498502  |
| N          | -3.756194 | -1.395104 | -1.520019 |
| N          | -3.727853 | -1.385149 | 1.662279  |
| N          | 3.096142  | -2.573438 | 1.675185  |
| N          | 2.113632  | -3.402099 | 1.520538  |
| N          | 0.670518  | 3.923763  | 1.505754  |
| N          | 1.892634  | 3.528237  | 1.663251  |
| N          | 2.680463  | 4.221914  | -2.268888 |
| H          | 3.678685  | 4.019103  | -2.183131 |
| N          | -4.969244 | 0.225507  | 2.26958   |
| H          | -5.296191 | 1.189866  | 2.179411  |
| C          | -5.03712  | -0.009406 | -2.570831 |
| H          | -5.430592 | 0.964935  | -2.848283 |
| N          | 0.465857  | 4.976891  | 2.26988   |
| H          | -0.447408 | 5.427989  | 2.183781  |
| N          | 2.324391  | -4.452981 | 2.287324  |
| H          | 1.648296  | -5.21529  | 2.215549  |
| C          | -4.604755 | -1.881991 | 2.571208  |
| H          | -4.595772 | -2.930645 | 2.85631   |
| C          | 2.491254  | -4.309469 | -2.570401 |
| H          | 1.842649  | -5.133073 | -2.856802 |
| C          | 0.674807  | 4.969079  | -2.558754 |
| H          | -0.237132 | 5.490444  | -2.837454 |
| C          | 3.775918  | -3.98559  | -2.973093 |
| H          | 4.468055  | -4.442483 | -3.674803 |
| N          | -4.567938 | -2.097624 | -2.284412 |
| H          | -4.500319 | -3.11423  | -2.211056 |
| C          | 3.974304  | -3.089377 | 2.572116  |
| H          | 4.882     | -2.559708 | 2.849037  |
| C          | 1.985513  | 5.156301  | -2.964014 |
| H          | 2.452452  | 5.847467  | -3.660056 |
| C          | -5.420443 | -0.839471 | 2.977521  |
| H          | -6.245353 | -0.777397 | 3.681702  |
| C          | 2.508493  | 4.338457  | 2.561343  |
| H          | 3.548347  | 4.191695  | 2.841128  |
| C          | 1.586613  | 5.288664  | 2.96693   |
| H          | 1.639971  | 6.119989  | 3.664262  |
| C          | -5.399726 | -1.281909 | -2.978459 |
| H          | -6.146989 | -1.650548 | -3.675554 |
| C          | 3.481044  | -4.316371 | 2.981965  |
| H          | 3.845424  | -5.064067 | 3.680828  |
| <b>2-1</b> |           |           |           |
| Mo         | 0.407183  | 3.080523  | 0.097722  |
| Mo         | -2.929975 | -1.217584 | -0.07097  |
| Mo         | -2.873511 | 1.345014  | -0.059041 |
| O          | -0.969595 | 1.653934  | -0.085729 |
| O          | -2.805507 | 0.051303  | 1.407047  |
| O          | -2.859467 | 0.068014  | -1.552492 |



---

|    |           |           |           |
|----|-----------|-----------|-----------|
| O  | 0.688932  | 4.786438  | -0.058153 |
| N  | -1.26535  | 3.618642  | 1.716983  |
| N  | -2.540432 | -2.923636 | 1.535611  |
| N  | -2.653753 | -3.111666 | -1.6311   |
| N  | -1.36703  | 3.783914  | -1.45935  |
| N  | -2.41093  | 3.039055  | 1.54539   |
| O  | -4.548723 | -1.84486  | 0.054248  |
| N  | -2.512845 | 3.202305  | -1.621568 |
| O  | -4.463568 | 2.042483  | 0.078312  |
| C  | -1.364547 | 4.51562   | 2.729633  |
| H  | -0.516247 | 5.118649  | 3.042541  |
| N  | -3.265006 | 3.53759   | 2.415558  |
| H  | -4.227453 | 3.199671  | 2.363808  |
| N  | -1.348374 | 4.882251  | -2.186189 |
| H  | -0.515394 | 5.46939   | -2.104329 |
| H  | -4.346498 | -2.972124 | 2.394201  |
| C  | -3.450706 | -3.834957 | -2.458856 |
| H  | -4.44635  | -3.495869 | -2.73261  |
| C  | -2.667033 | 4.470842  | 3.196273  |
| H  | -3.186795 | 5.004505  | 3.986976  |
| C  | -2.515123 | 5.034202  | -2.860066 |
| H  | -2.711594 | 5.869578  | -3.526331 |
| C  | -3.266696 | 3.934835  | -2.481049 |
| H  | -4.274712 | 3.634656  | -2.754841 |
| Mo | 2.64931   | 1.799372  | 0.027405  |
| Mo | 0.269017  | -3.098639 | 0.078176  |
| Mo | 2.53689   | -1.866324 | 0.022311  |
| O  | 1.903241  | -0.045772 | 0.155543  |
| O  | 1.327468  | -2.45351  | 1.525702  |
| O  | 1.270821  | -2.323027 | -1.420405 |
| O  | 3.933708  | 2.938764  | 0.042474  |
| N  | 4.09454   | 0.589974  | 1.51795   |
| N  | -1.423045 | -3.556955 | 1.700088  |
| N  | -1.535678 | -3.742978 | -1.460242 |
| N  | 3.82421   | 0.592911  | -1.488706 |
| N  | 4.013269  | -0.700692 | 1.441295  |
| O  | 0.486741  | -4.817953 | -0.055924 |
| N  | 3.790115  | -0.743801 | -1.488622 |
| O  | 3.838356  | -3.020569 | 0.132456  |
| C  | 5.238036  | 0.925383  | 2.16563   |
| H  | 5.517487  | 1.964285  | 2.31881   |
| N  | 5.077314  | -1.223785 | 2.014331  |
| H  | 5.188303  | -2.236199 | 1.916184  |
| N  | 4.624378  | 1.053973  | -2.419849 |
| C  | -1.54898  | -4.427472 | 2.732474  |
| H  | -0.72624  | -5.065471 | 3.044029  |
| H  | -0.775579 | -5.490703 | -2.04891  |
| C  | 5.889505  | -0.250841 | 2.494823  |
| H  | 6.827516  | -0.458399 | 3.001811  |
| C  | 5.132303  | -0.016945 | -3.059021 |

---

|            |           |           |           |
|------------|-----------|-----------|-----------|
| H          | 5.827209  | 0.09089   | -3.889906 |
| C          | 4.608591  | -1.165622 | -2.466293 |
| H          | 4.758192  | -2.224145 | -2.664626 |
| Na         | 0.124153  | 0.014344  | -1.295274 |
| O          | -1.037782 | -1.617478 | -0.116689 |
| O          | 1.456386  | 2.403349  | 1.533995  |
| O          | 1.346848  | 2.229069  | -1.393926 |
| C          | -2.838767 | -4.307082 | 3.220324  |
| C          | -2.757802 | -4.981977 | -2.807406 |
| H          | -3.370385 | -4.796935 | 4.031234  |
| H          | -3.002444 | -5.828922 | -3.442406 |
| N          | -1.577757 | -4.864842 | -2.149856 |
| N          | -3.402864 | -3.360434 | 2.430639  |
| <b>3-1</b> |           |           |           |
| Mo         | 1.275874  | -2.864047 | 0.030101  |
| Mo         | -3.09408  | 0.38066   | -0.034367 |
| Mo         | -1.287398 | -2.861566 | 0.027569  |
| O          | -1.567952 | -0.950634 | 0.034665  |
| O          | -0.004055 | -2.651434 | -1.451226 |
| O          | -0.006985 | -2.872845 | 1.510789  |
| N          | 3.042357  | -2.532817 | 1.627869  |
| N          | -3.055028 | -2.450168 | -1.492689 |
| N          | 3.057256  | -2.44895  | -1.485337 |
| O          | 1.935826  | -4.465682 | -0.158105 |
| N          | -3.681473 | -1.32627  | -1.639802 |
| O          | -4.805388 | 0.635333  | 0.070472  |
| O          | -1.951541 | -4.462294 | -0.159829 |
| N          | -3.663056 | -1.370546 | 1.512195  |
| C          | 3.715356  | -3.316233 | 2.508744  |
| N          | 3.625577  | -3.343178 | -2.270137 |
| N          | -3.059105 | -2.513353 | 1.622761  |
| C          | -4.671247 | -2.816326 | -2.937143 |
| H          | -5.286948 | -3.384494 | -3.628934 |
| C          | -4.693437 | -1.493199 | -2.527558 |
| H          | -5.358168 | -0.67566  | -2.794748 |
| N          | -3.633271 | -3.357502 | -2.254615 |
| H          | -3.276569 | -4.312924 | -2.177357 |
| C          | -3.711126 | -3.276964 | 2.536075  |
| H          | -3.378855 | -4.2819   | 2.782822  |
| C          | -4.782719 | -2.536806 | 3.005714  |
| H          | -5.559029 | -2.743086 | 3.737315  |
| N          | -4.697969 | -1.366876 | 2.326873  |
| H          | -5.298361 | -0.539653 | 2.311639  |
| H          | 3.386815  | -4.325362 | 2.743359  |
| H          | 3.263228  | -4.297567 | -2.215924 |
| Mo         | 3.094021  | 0.373531  | -0.01071  |
| Mo         | -1.817552 | 2.638572  | -0.000445 |
| Mo         | 1.825416  | 2.636448  | -0.03882  |
| O          | 0.002667  | 1.80587   | -0.052853 |
| O          | 2.363169  | 1.339184  | -1.497748 |

|            |           |           |           |
|------------|-----------|-----------|-----------|
| O          | 2.231536  | 1.304425  | 1.44018   |
| N          | 3.647079  | -1.390057 | 1.5244    |
| N          | 0.677276  | 3.833135  | -1.525731 |
| N          | 3.689503  | -1.325875 | -1.61445  |
| O          | 4.803519  | 0.62216   | 0.146135  |
| N          | -0.658536 | 3.877687  | -1.474102 |
| O          | -3.005825 | 3.875178  | -0.052449 |
| O          | 3.016702  | 3.866635  | 0.071022  |
| N          | -0.666887 | 3.800522  | 1.506039  |
| N          | 4.703773  | -1.405511 | 2.310201  |
| C          | 4.693584  | -1.479154 | -2.513347 |
| H          | 5.358142  | -0.658461 | -2.771393 |
| N          | 0.666614  | 3.849521  | 1.45004   |
| C          | 0.092791  | 5.24207   | -3.013157 |
| H          | 0.212332  | 5.967998  | -3.815144 |
| C          | -1.063658 | 4.763623  | -2.396971 |
| H          | -2.117097 | 4.990936  | -2.539011 |
| N          | 1.153152  | 4.643835  | -2.439147 |
| C          | 1.074966  | 4.712848  | 2.393007  |
| H          | 2.128595  | 4.939465  | 2.534273  |
| C          | -0.079958 | 5.172456  | 3.025992  |
| H          | -0.19769  | 5.878658  | 3.845681  |
| N          | -1.141742 | 4.585938  | 2.442439  |
| H          | 5.311727  | -0.583548 | 2.279354  |
| Na         | -0.009087 | 0.095924  | -1.528353 |
| Na         | -0.000614 | 0.237626  | 1.548584  |
| O          | 1.562854  | -0.953313 | 0.034888  |
| O          | -2.305298 | 1.338415  | -1.492379 |
| O          | -2.276781 | 1.308209  | 1.448714  |
| C          | 4.661363  | -2.793489 | -2.949496 |
| C          | 4.802423  | -2.589061 | 2.96318   |
| H          | 5.598373  | -2.813319 | 3.667908  |
| H          | 5.268125  | -3.350256 | -3.658261 |
| <b>4-1</b> |           |           |           |
| Mo         | 3.173878  | -0.334178 | -0.026293 |
| Mo         | 2.319162  | 2.09699   | -0.128376 |
| Mo         | 0.694858  | -3.049788 | 0.059187  |
| Mo         | -1.302568 | 2.843393  | 0.099075  |
| Mo         | -3.010269 | 0.914393  | 0.024619  |
| Mo         | -1.857    | -2.580288 | -0.039497 |
| Na         | -0.060927 | -0.091845 | -1.533049 |
| Na         | 0.055857  | -0.064631 | 1.518256  |
| O          | -1.73888  | -0.549583 | 0.128201  |
| O          | 1.378373  | -1.191994 | -0.113888 |
| O          | 2.541596  | 0.832277  | -1.55778  |
| O          | 2.554921  | 0.892857  | 1.39001   |
| O          | 0.361199  | 1.798269  | -0.030807 |
| O          | -0.520932 | -2.558136 | -1.450221 |
| O          | -2.047199 | 1.846024  | -1.414673 |
| N          | 0.10822   | 3.944026  | -1.482238 |

---

|   |           |           |           |
|---|-----------|-----------|-----------|
| O | -0.544553 | -2.602525 | 1.476599  |
| O | -1.982283 | 1.769189  | 1.546448  |
| O | -2.679708 | -4.082439 | 0.025318  |
| O | 3.636322  | 3.226045  | -0.072564 |
| N | 1.359272  | 3.675798  | -1.68982  |
| O | -2.071926 | 4.401396  | 0.058585  |
| N | 3.457846  | -2.193797 | -1.493863 |
| N | -3.774294 | -0.524615 | -1.515797 |
| N | 3.271401  | -1.952236 | 1.526601  |
| N | 1.451411  | 3.644481  | 1.462888  |
| N | -3.611935 | -1.945993 | 1.479379  |
| O | 4.888273  | -0.31244  | -0.132556 |
| N | -3.341815 | -1.791961 | -1.546224 |
| N | 2.557629  | -3.119085 | -1.395342 |
| O | -4.619867 | 1.55024   | 0.22155   |
| N | -3.979932 | -0.706218 | 1.420246  |
| N | 2.362274  | -2.934421 | 1.572441  |
| N | 0.196568  | 3.896415  | 1.664388  |
| N | 3.001626  | -4.202066 | -1.998224 |
| H | 2.423533  | -5.041458 | -1.902174 |
| N | -0.23167  | 4.965853  | -2.24211  |
| H | -1.185364 | 5.31966   | -2.143987 |
| O | 0.94765   | -4.7603   | -0.092219 |
| C | 1.853955  | 4.539466  | -2.611975 |
| H | 2.892532  | 4.50184   | -2.930066 |
| N | -3.918905 | -2.472296 | -2.505597 |
| C | 4.521073  | -2.676193 | -2.184367 |
| H | 5.40493   | -2.069273 | -2.360885 |
| N | 4.176717  | -2.089739 | 2.464745  |
| N | -5.149828 | -0.584571 | 2.014075  |
| H | -5.601311 | 0.330715  | 1.933264  |
| C | 0.080309  | 4.84629   | 2.626285  |
| H | -0.889005 | 5.217361  | 2.948433  |
| C | 1.360661  | 5.185096  | 3.03028   |
| H | 1.740797  | 5.884991  | 3.769154  |
| N | 2.16515   | 4.407035  | 2.266159  |
| H | 3.182111  | 4.342362  | 2.187368  |
| C | -4.673604 | -0.384829 | -2.504148 |
| H | -5.177248 | 0.561292  | -2.686259 |
| C | -4.55871  | -2.66028  | 2.136769  |
| H | -4.461314 | -3.733277 | 2.27888   |
| C | 4.233532  | -3.988193 | -2.520522 |
| H | 4.789166  | -4.750451 | -3.059227 |
| C | 0.822642  | 5.38558   | -2.983096 |
| H | 0.762656  | 6.212792  | -3.684836 |
| C | -5.568757 | -1.78153  | 2.491009  |
| H | -6.511737 | -1.913973 | 3.013741  |
| C | -4.758063 | -1.626457 | -3.132912 |
| H | -5.361079 | -1.94488  | -3.980988 |
| C | 3.853478  | -3.198904 | 3.155477  |

---

---

|   |          |           |          |
|---|----------|-----------|----------|
| H | 4.447998 | -3.538429 | 4.001381 |
| C | 2.700649 | -3.743441 | 2.589249 |
| H | 2.115509 | -4.626897 | 2.832634 |

---

## References

- 1 L. Deng, X. Dong and Z. H. Zhou, *Chem. – Eur. J.*, 2021, **27**, 9643–9653.
- 2 L. Deng, R. Y. Lin and Z. H. Zhou, *Dalton Trans.*, 2022, **51**, 5239–5249.
- 3 J. Chuang, W. Ouellette and J. Zubieta, *Inorg. Chim. Acta*, 2008, **361**, 2357–2364.
- 4 P. P. Zhu, X. Y. Yang, X. Li, N. Sheng, H. F. Zhang, G. G. Zhang and J. Q. Sha, *Dalton Trans.*, 2020, **49**, 79–88.
- 5 X. Y. Yang, P. P. Zhu, X. L. Ma, W. J. Li, Z. L. Tan and J. Q. Sha, *CrystEngComm*, 2020, **22**, 1340–1345.
- 6 X. H. Zhou, Y. H. Peng, X. D. Du, J. L. Zuo and X. Z. You, *CrystEngComm*, 2009, **11**, 1964–1970.
- 7 T. Wu, M. Li, D. Li and X. C. Huang, *Cryst. Growth Des.*, 2008, **8**, 568–574.
- 8 M. Grzywa, D. Denysenko, J. Hanss, E. W. Scheidt, W. Scherer, M. Weil and D. Volkmer, *Dalton Trans.*, 2012, **41**, 4239–4248.
- 9 R. N. Devi, P. Rabu, V. O. Golub, C. J. O'Connor and J. Zubieta, *Solid State Sci.*, 2002, **4**, 1095–1102.
- 10 L. Kan, G. H. Li and Y. L. Liu, *ACS Appl. Mater. Interfaces*, 2020, **12**, 18642–18649.
- 11 H. J. Yang, J. Le, A. Dinh, X. Zhao, X. T. Chen, F. Peng, P. Y. Feng and X. H. Bu, *Chem. – Eur. J.*, 2019, **25**, 10590–10593.
- 12 P. Lama and L. J. Barbour, *J. Am. Chem. Soc.*, 2018, **140**, 2145–2150.
- 13 Y. X. Ye, X. Z. Wu, Z. Z. Yao, L. Wu, Z. T. Cai, L. H. Wang, X. L. Ma, Q. H. Chen, Z. J. Zhang and S. C. Xiang, *J. Mater. Chem. A*, 2016, **4**, 4062–4070.
- 14 J. Q. Sha, X. Y. Yang, N. Sheng, G. D. Liu, J. S. Li and J. B. Yang, *J. Solid State Chem.*, 2018, **263**, 52–59.
- 15 J. Q. Sha, X. Li, J. S. Li, X. Y. Yang, H. F. Zhang, M. B. Yue and K. F. Zhou, *Cryst. Growth Des.*, 2018, **18**, 2289–2296.
- 16 M. T. Li, X. Y. Yang, J. S. Li, N. Sheng, G. D. Liu, J. Q. Sha and Y. Q. Lan, *Inorg. Chem.*, 2018, **57**, 3865–3872.
- 17 B. C. Hughes, Z. Lu and D. M. Jenkins, *Chem. Commun.*, 2014, **50**, 5273–5275.
- 18 T. Bunchuay, A. Docker, U. Eiamprasert, P. Surawatanawong, A. Brown and P. D. Beer, *Angew. Chem. Int. Ed.*, 2020, **59**, 12007–12012.
- 19 M. Karbarz and J. Romanski, *Inorg. Chem.*, 2016, **55**, 3616–3623.
- 20 J. Romański, B. Trzaskowski and P. Piątek, *Dalton Trans.*, 2013, **42**, 15271–15274.
- 21 Y. W. Li and R. T. Yang, *Langmuir*, 2007, **23**, 12937–12944.
- 22 M. Dincă, A. F. Yu and J. R. Long, *J. Am. Chem. Soc.*, 2006, **128**, 8904–8913.
- 23 J. R. Li, Y. Tao, Q. Yu, X. H. Bu, H. Sakamoto and S. Kitagawa, *Chem. – Eur. J.*, 2008, **14**, 2771–2776.
- 24 Y. E. Cheon, J. Park and M. P. Suh, *Chem. Commun.*, 2009, 5436–5438.
- 25 W. L. Lou, J. F. Yang, L. B. Li and J. P. Li, *J. Solid State Chem.*, 2014, **213**, 224–228.
- 26 M. Du, C. P. Li, M. Chen, Z. W. Ge, X. Wang, L. Wang and C. S. Liu, *J. Am. Chem. Soc.*, 2014, **136**, 10906–10909.
- 27 S. M. Zhang, Z. Chang, T. L. Hu and X. H. Bu, *Inorg. Chem.*, 2010, **49**, 11581–11586.
